# 1 Serotonergic Neurons Mediate 2 Operant Conditioning in *Drosophila* 3 Larvae

4 **Kristina T Klein**<sup>1,2,†</sup>, **Elise C Croteau-Chonka**<sup>1,2,†</sup>, **Lakshmi Narayan**<sup>1</sup>, **Michael**  
5 **Winding**<sup>1,2</sup>, **Jean-Baptiste Masson**<sup>1,3</sup>, **Marta Zlatic**<sup>1,2,4\*</sup>

\*For correspondence:

[mzlatic@mrc-lmb.cam.ac.uk](mailto:mzlatic@mrc-lmb.cam.ac.uk) (MZ)

†These authors contributed  
equally to this work

6 <sup>1</sup>Janelia Research Campus, Howard Hughes Medical Institute, Ashburn, Virginia, United  
7 States; <sup>2</sup>Department of Zoology, University of Cambridge, Cambridge, United Kingdom;  
8 <sup>3</sup>Decision and Bayesian Computation, Neuroscience Department CNRS UMR 3751 &  
9 Computational Biology Department USR 3756 (C3BI/DBC), Institut Pasteur, CNRS, Paris,  
10 France; <sup>4</sup>MRC Laboratory of Molecular Biology, Trumpington, Cambridge, United  
11 Kingdom

12  
13 **Abstract** Observed across species, operant conditioning facilitates learned associations  
14 between behaviours and outcomes, biasing future action selection to maximise reward and avoid  
15 punishment. To elucidate the underlying neural mechanisms, we built a high-throughput tracker  
16 for *Drosophila melanogaster* larvae, combining real-time behaviour detection with closed-loop  
17 optogenetic and thermogenetic stimulation capabilities. We demonstrate operant conditioning in  
18 *Drosophila* larvae by inducing a bend direction preference through optogenetic activation of  
19 reward-encoding serotonergic neurons. Specifically, we establish that the ventral nerve cord is  
20 necessary for this memory formation. Our results extend the role of serotonergic neurons for  
21 learning in insects as well as the existence of learning circuits outside the mushroom body. This  
22 work supports future studies on the function of serotonin and the mechanisms underlying  
23 operant conditioning at both circuit and cellular levels.

## 24 25 **Introduction**

26 Animals must rapidly alter their behaviour in response to environmental changes. An important  
27 adaptation strategy is associative learning (*Dickinson, 1981; Rescorla, 1988*), in which an animal  
28 learns to predict an unconditioned stimulus (US) by the occurrence of a conditioned stimulus (CS).  
29 The US is often a punishing or rewarding event such as pain or the discovery of a new food source  
30 (*Pavlov, 1927*). The nature of the CS distinguishes two major associative learning types: classical  
31 conditioning (*Pavlov, 1927*) and operant conditioning (*Skinner, 1938; Thorndike, 1911*).

32 In classical conditioning, the CS is an inherently neutral environmental stimulus such as a sound,  
33 odour, or visual cue. Pairing with an appetitive or aversive US leads to learned approach or avoid-  
34 ance of the CS in the future. Many vertebrates (*Andreatta and Pauli, 2015; Brown et al., 1951;*  
35 *Jones et al., 2005; Braubach et al., 2009*) and invertebrates (*Takeda, 1961; Vinauger et al., 2014;*  
36 *Alexander et al., 1984; Wen et al., 1997; Scherer et al., 2003; Davis, 2005; Cognigni et al., 2018; Vogt*  
37 *et al., 2014*) can make these associations. Across the animal kingdom, neural circuits have been  
38 identified as convergence sites for the external CS and the rewarding or punishing US (*Heisenberg*  
39 *et al., 1985; Hawkins and Byrne, 2015; Oswald and Waddell, 2015; Gründemann and Lüthi, 2015;*  
40 *Caroni, 2015; Tonegawa et al., 2015*). In classical conditioning of both larval and adult *Drosophila*,

41 the mushroom body (MB) brain area serves this purpose (*Cognigni et al., 2018; Heisenberg et al.,*  
42 *1985; Heisenberg, 2003; Rohwedder et al., 2016; Vogt et al., 2014; Saumweber et al., 2018; Oswald*  
43 *and Waddell, 2015*). In each larval brain hemisphere, the CS is encoded by a subset of the ap-  
44 proximately 110 Kenyon cells (KCs) (*Aso et al., 2014a; Honegger et al., 2011; Berck et al., 2016; Lin*  
45 *et al., 2014; Oswald and Waddell, 2015; Campbell et al., 2013; Turner et al., 2008; Eichler et al.,*  
46 *2017*), which synapse onto 24 MB output neurons (MBONs) driving approach or avoidance (*Aso*  
47 *et al., 2014b; Oswald et al., 2015; Perisse et al., 2016; Séjourné et al., 2011; Saumweber et al., 2018;*  
48 *Shyu et al., 2017; Plaçais et al., 2013; Eichler et al., 2017*). KC to MBON connection strength is  
49 modulated by dopaminergic and octopaminergic neurons, which represent the rewarding or pun-  
50 ishing US (*Schwaerzel et al., 2003; Schroll et al., 2006; Honjo and Furukubo-Tokunaga, 2009; Vogt*  
51 *et al., 2014; Saumweber et al., 2018; Waddell, 2013*). Activation of the MB-innervating PAM cluster  
52 dopaminergic neurons serves as both a necessary and sufficient reward signal in classical condi-  
53 tioning (*Rohwedder et al., 2016; Liu et al., 2012; Vogt et al., 2014; Waddell, 2013; Cognigni et al.,*  
54 *2018*).

55 In operant conditioning, the CS is an animal's own action (*Skinner, 1938; Thorndike, 1911*). Af-  
56 ter memory formation, the animal can predict the outcome of its behaviour and bias future action  
57 selection accordingly, usually to maximise reward and avoid punishment (*Skinner, 1938*). This be-  
58 havioural adaptation can facilitate novel action sequences (*Topál et al., 2006; Nottebohm, 1991;*  
59 *Fee and Goldberg, 2011*) and, in some cases, repetitive, high-frequency motor activity (*Olds and*  
60 *Milner, 1954; Corbett and Wise, 1980; Jin and Costa, 2010; Lovell et al., 2015*). Such observations  
61 have wider implications for understanding diseases including obsessive-compulsive disorder and  
62 addiction (*Everitt et al., 2018; Balleine et al., 2015; Joel, 2006*). Invertebrates are also capable of  
63 operant conditioning (*Brembs, 2003; Hoyle, 1979; Abramson et al., 2016; Nuwal et al., 2012; Booker*  
64 *and Quinn, 1981*). Despite countless operant conditioning experiments across species using vari-  
65 ous CS-US combinations, the underlying neural mechanisms remain poorly understood. For an  
66 animal to associate an action with its outcome, behavioural information must converge with cir-  
67 cuits encoding positive or negative valence. Although vertebrate basal ganglia-like structures ex-  
68 emplify this (*Fee and Goldberg, 2011; Redgrave et al., 2011; Balleine et al., 2009*), some learned  
69 action-outcome associations do not require the brain (*Booker and Quinn, 1981; Horridge, 1962;*  
70 *Grau et al., 1998*). Operant conditioning may hence occur in more than one area of the central ner-  
71 vous system (CNS). It is also unclear to what extent learning at these sites is mediated by synaptic  
72 plasticity (*Lovinger, 2010; Surmeier et al., 2007; Reynolds and Wickens, 2002; Joynes et al., 2004;*  
73 *Gómez-Pinilla et al., 2007*) versus changes in the intrinsic excitability of individual neurons (*Dong*  
74 *et al., 2006; Shen et al., 2005; Nargeot et al., 1997; Brembs et al., 2002; Nargeot et al., 2009*). We  
75 aim to establish the *Drosophila* larva as a tractable model system for studying the neural circuit  
76 mechanisms underlying operant conditioning.

77 *Drosophila melanogaster* larvae perform various different actions. Typically, when exploring an  
78 environment, a larva alternates between crawling via forward peristalsis (*Heckscher et al., 2012*)  
79 and bending its head once or more to the left or right (*Gomez-Marin et al., 2011; Luo et al., 2010;*  
80 *Kane et al., 2013; Figure 1A*). In the presence of nociceptive stimuli, larvae exhibit escape behaviour.  
81 While the most common response is an increase in bending away from undesirable conditions,  
82 including extreme temperature (*Luo et al., 2010; Lahiri et al., 2011*), light (*Kane et al., 2013*), or  
83 wind (*Jovanic et al., 2019*), larvae also retreat from aversive sources using backward peristalsis  
84 (*Masson et al., 2020; Kernan et al., 1994; Heckscher et al., 2012; Vogelstein et al., 2014; Figure 1A*).  
85 The fastest escape response is rolling, where the larva moves laterally by curling into a C-shape and  
86 quickly turning around its own body axis (*Robertson et al., 2013; Hwang et al., 2007; Ohyama et al.,*  
87 *2013; Figure 1A*). In nature, rolling is only observed after exposure to a strong noxious stimulus,  
88 such as heat or a predator attack (*Ohyama et al., 2015; Robertson et al., 2013; Tracey et al., 2003*).

89 Powerful genetic toolkits have advanced the observation and manipulation of larval behaviour  
90 at the cellular level, making *Drosophila* larvae particularly well-suited for studying the neural mech-  
91 anisms underlying learning. In *Drosophila*, individual neurons are uniquely identifiable, with mor-

92 phology and function preserved across animals (*Skeath and Thor, 2003; Wong et al., 2002; Marin*  
93 *et al., 2002; Jefferis et al., 2007*). Together with tissue-localised protein expression afforded by  
94 the GAL4-UAS binary expression system (*Fischer et al., 1988; Brand and Perrimon, 1993*), this has  
95 yielded neuron-specific GAL4 drivers (*Jenett et al., 2012; Luan et al., 2006; Pfeiffer et al., 2010*) that  
96 reproducibly target the same group of cells in each individual. Adding fluorescent markers helps  
97 pinpoint a neuron's location and reveal its anatomical features (*Lee and Luo, 1999*), while producing  
98 light-sensitive channelrhodopsins and temperature-sensitive ion channels facilitates optogenetic  
99 (*Zemelman et al., 2002; Lima and Miesenböck, 2005*) or thermogenetic (*Hamada et al., 2008; Ki-*  
100 *tamoto, 2001*) modulation of neural activity. Furthermore, the larva's compact CNS has made it  
101 feasible to manually reconstruct neurons and their synaptic partners from a larval electron mi-  
102 croscopy (EM) volume (*Berck et al., 2016; Eichler et al., 2017; Fushiki et al., 2016; Ohyama et al.,*  
103 *2015; Schlegel et al., 2016; Larderet et al., 2017; Jovanic et al., 2016, 2019*), giving rise to a full wiring  
104 diagram of the MB (*Eichler et al., 2017; Eschbach et al., 2020a,b*).

105 There is overwhelming evidence that larvae are capable of classical conditioning. They can  
106 be trained to approach an odour paired with a gustatory reward (*Schleyer et al., 2011; Hendel*  
107 *et al., 2005; Kudow et al., 2017; Niewalda et al., 2008*), or avoid an odour paired with light (*von*  
108 *Essen et al., 2011*), electric shock (*Aceves-Piña and Quinn, 1979; Tully et al., 1994*), heat (*Khurana*  
109 *et al., 2012*), vibration (*Eschbach et al., 2011*), or the bitter compound quinine (*Gerber and Hendel,*  
110 *2006; Apostolopoulou et al., 2014*). Light can also be a CS: innate avoidance of light and prefer-  
111 ence for darkness (*Sawin-McCormack et al., 1995*) can be modulated when paired with reward or  
112 punishment (*Gerber et al., 2004; von Essen et al., 2011*). It has remained an open question, how-  
113 ever, whether *Drosophila* larvae can form action–outcome associations and where in the CNS these  
114 memories are formed.

115 Conducting operant conditioning with larvae requires real-time behaviour detection such that  
116 reward or punishment can be administered with minimal delay (*Figure 1B*). Single-animal closed-  
117 loop trackers have recently been developed (*Schulze et al., 2015; Tadres and Louis, 2020*). However,  
118 the efficiency of training paradigms would improve with automated US delivery and simultane-  
119 ous conditioning of multiple animals. Therefore, we here introduce a high-throughput tracker for  
120 *Drosophila* larvae with real-time behaviour detection and closed-loop stimulation. Efficiency of the  
121 setup stems from the simultaneous, real-time, behaviour detection for up to 16 freely moving lar-  
122 vae, and targeted closed-loop optogenetic and thermogenetic stimulus delivery with full intensity  
123 control and minimal delay.

## 124 Results

### 125 High-throughput closed-loop tracker

#### 126 Hardware design

127 Designing an automated operant conditioning protocol for the *Drosophila* larva was challenging  
128 due to the larva's physical characteristics. We excluded partial immobilisation protocols similar  
129 to the ones used to condition adult *Drosophila* navigation through virtual environments (*Nuwal*  
130 *et al., 2012; Wolf and Heisenberg, 1991; Wolf et al., 1998; Brembs, 2011*). We instead built a high-  
131 throughput multi-larva tracker combining live computer vision behaviour detection with closed-  
132 loop control of US delivery in response to unrestricted larval behaviour.

133 All hardware resided within an optically opaque enclosure to ensure experiments were per-  
134 formed without environmental light. Larvae moved freely on an agarose plate, backlit from be-  
135 low by an infrared LED and observed from above through a high-resolution camera (*Figure 1C*).  
136 A Camera Link communication protocol interfaced with a high-performance field-programmable  
137 gate array (FPGA), which itself interacted with the host computer. The FPGA and the host computer  
138 performed image processing, behaviour detection, and stimulus calculation (*Figure 1D*).

139 Our operant conditioning paradigm targeted individual larvae performing specific behaviours.  
140 Optogenetic stimulation was achieved by directing red light through two digital micromirror de-

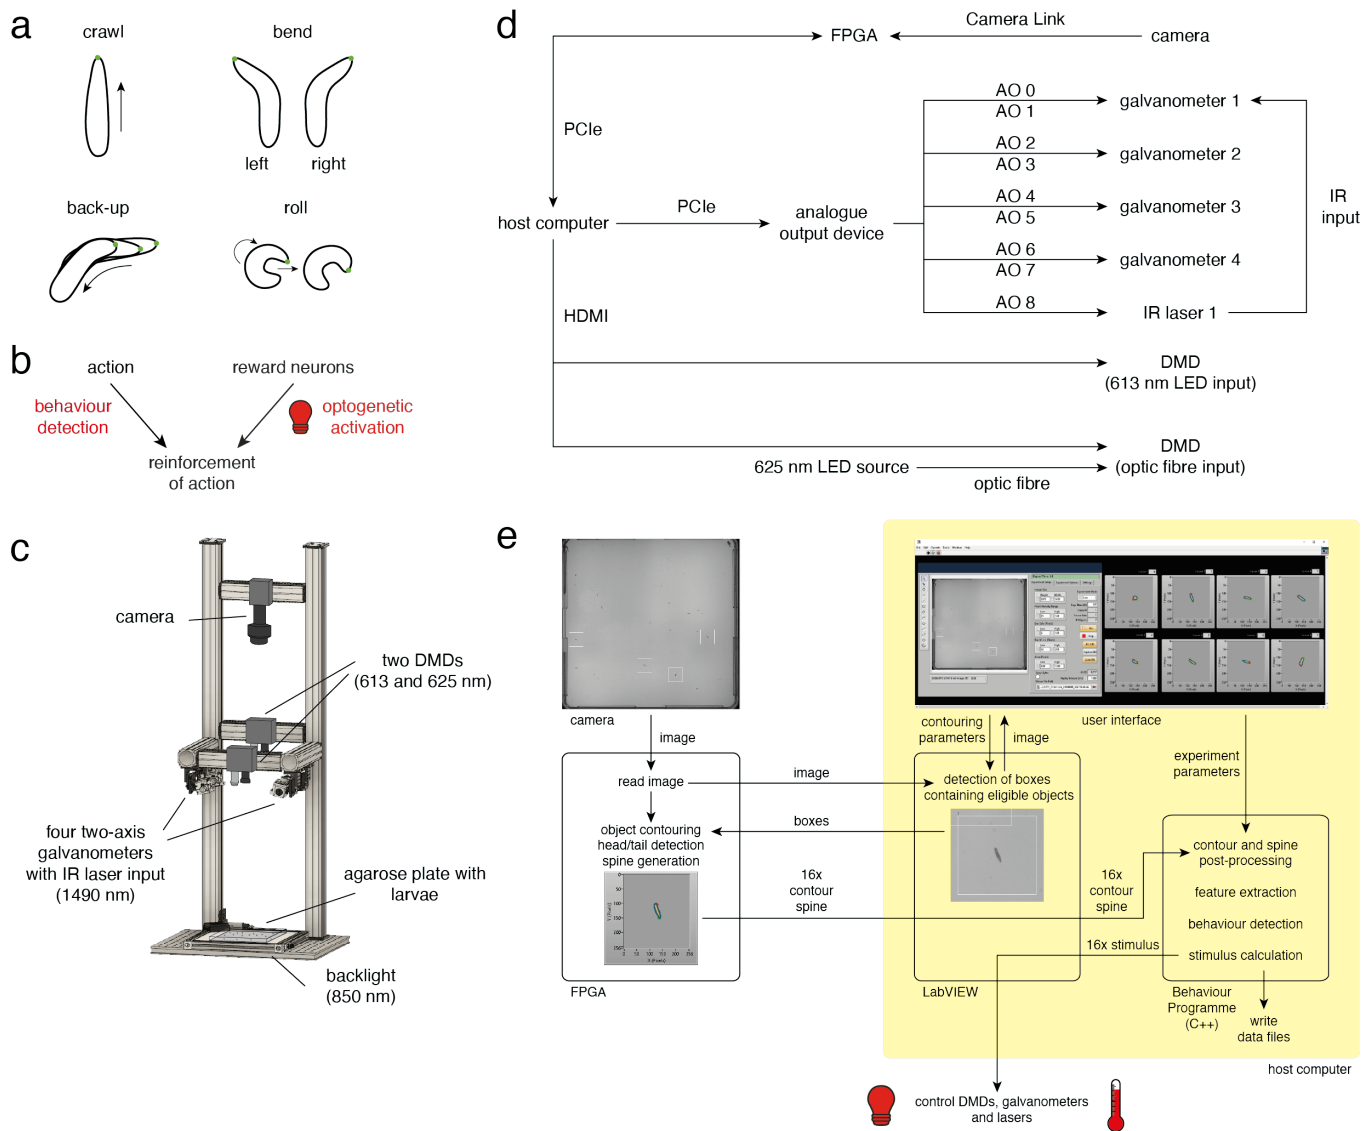

**Figure 1. High-throughput operant conditioning in *Drosophila* larvae.** **a.** Behavioural repertoire of *Drosophila* larvae. Schematics show the four most prominent actions displayed by *Drosophila* larvae (crawl, left and right bend, back-up and roll). The larval contour is displayed as a black outline with a green dot marking the head. **b.** In fully automated operant conditioning, an action of interest was reinforced by coupling real-time behaviour detection with optogenetic activation of reward circuits. **c.** High-throughput tracker schematic showing the relative positions of the agarose plate, backlight, camera, digital micromirror devices (DMDs), and galvanometers. IR: infrared. **d.** Block diagram of hardware components. AO: analogue output, FPGA: field-programmable gate array. **e.** Data flow between software elements.

**Figure 1-Figure supplement 1.** Contour calculation on field-programmable gate array (FPGA).

**Figure 1-Figure supplement 2.** Detecting head and tail.

**Figure 1-Figure supplement 3.** Calculating a smooth spine and landmark points.

**Figure 1-Figure supplement 4.** Calculating direction vectors.

**Figure 1-Figure supplement 5.** Features describing body shape.

**Figure 1-Figure supplement 6.** Velocity features.

**Figure 1-Figure supplement 7.** Temporal smoothing of features.

**Figure 1-Figure supplement 8.** Differentiation by convolution.



141 vices (DMDs) which were programmed to project small 1 cm<sup>2</sup> squares at the location of individual  
142 larvae. Both DMDs, which were positioned to project over the entire plate area, were operated  
143 simultaneously (**Figure 1C**).

144 Thermogenetic stimulation of individual larvae was achieved by directing a 1490 nm infrared  
145 (IR) laser beam through a two-axis scanning galvanometer mirror positioning system (**Figure 1C**), a  
146 technique previously used to stimulate single adult flies (**Bath et al., 2014; Wu et al., 2014**). Because  
147 the 1490 nm wavelength is well-absorbed by water (**Curcio and Petty, 1951**), larvae exposed to the  
148 IR beam were rapidly heated. We took advantage of the galvanometer's high scanning velocity to  
149 rapidly cycle the beam between four larvae (**Figure 1D**).

## 150 Software architecture

151 Several computer vision algorithms exist for real-time tracking of freely behaving animals. **Stowers**  
152 **et al. (2017)** and **Krynitsky et al. (2020)** developed software for tracking mice, and **Mischiati et al.**  
153 **(2015)** developed high-speed tracking of single dragonflies in three-dimensional space. There are  
154 numerous tracking frameworks for adult *Drosophila*, some requiring the flies to move within a two-  
155 dimensional plane (**Straw and Dickinson, 2009; Donelson et al., 2012**) while others detect the three-  
156 dimensional position of single (**Fry et al., 2008**) or multiple (**Grover et al., 2008; Straw et al., 2011**)  
157 flies. The Multi-Worm Tracker (MWT) software developed by **Swierczek et al. (2011)** is suitable for  
158 simultaneously tracking a large number of *Caenorhabditis elegans* and has been adapted to analyse  
159 *Drosophila* larvae reactions in response to various stimuli (**Ohyama et al., 2013; Vogelstein et al.,**  
160 **2014; Jovanic et al., 2019; Masson et al., 2020**).

161 Operant conditioning requires live behaviour detection to trigger delivery of reward or punish-  
162 ment. Numerous algorithms have been developed to analyse offline behavioural recordings of an-  
163 imals such as *C. elegans* (**Huang et al., 2006; Stephens et al., 2008; Gupta and Gomez-Marin, 2019**),  
164 zebrafish larvae (**Mirat et al., 2013; Reddy et al., 2020**), adult *Drosophila* (**Katsov and Clandinin,**  
165 **2008; Branson et al., 2009; Dankert et al., 2009; Robie et al., 2017; Berman et al., 2014; Klibaite**  
166 **et al., 2017**), bees (**Veeraraghavan et al., 2008**), and mice (**Mathis et al., 2018; Luxem et al., 2020;**  
167 **van Dam et al., 2020**). The *Drosophila* larva has also attracted attention due to analytical challenges  
168 surrounding its deformable body and limited set of distinguishing features (**Luo et al., 2010; Gomez-**  
169 **Marin et al., 2011; Gershow et al., 2012; Denisov et al., 2013; Vogelstein et al., 2014; Ohyama et al.,**  
170 **2013, 2015; Masson et al., 2020**). Most of these approaches are not ideal to run in real time or re-  
171 quire a mix of past and future information to provide reliable behaviour detection (**Gomez-Marin**  
172 **et al., 2011; Masson et al., 2020**). More generally, machine learning based methods have gained  
173 momentum in providing both supervised and unsupervised approaches to behaviour analysis. It  
174 is worth noting a recent trend in developing unsupervised learning methods (e.g. **Graving and**  
175 **Couzin, 2020; Luxem et al., 2020**).

176 While real-time behaviour detection of casts and runs has been developed for a single animal  
177 (**Schulze et al., 2015**), our study of operant conditioning in freely behaving *Drosophila* larvae re-  
178 quired efficient, real-time behaviour detection of multiple animals. We built a system to simul-  
179 taneously track up to 16 larvae in real time, using LabVIEW for the user interface and algorithm  
180 implementation (**Figure 1E**). Instrumental to this software architecture was the fast image pro-  
181 cessing speed afforded by FPGA-based parallelisation (**Soares dos Santos and Ferreira, 2014; Li**  
182 **et al., 2011; Zhang et al., 2017**). Neuroscientists have adapted FPGA's real-time analysis capabili-  
183 ties (**Shirvaikar and Bushnaq, 2009; Uzun et al., 2005; Chiuchisan, 2013; Yasukawa et al., 2016**) to  
184 track rats (**Chen et al., 2005**), zebrafish larvae (**Cong et al., 2017**), and fluorescently labelled neu-  
185 rons in freely behaving *Drosophila* larvae (**Karagoyozov et al., 2018**). In our system, the FPGA and  
186 host computer worked together to read the raw camera images, detect eligible objects, and extract  
187 and process object features (i. e. contour, head and tail position, and body axis) (**Figure 1E**). Larval  
188 body shape, velocity, and direction of motion facilitated robust behaviour detection which, in turn,  
189 drove closed-loop optogenetic and thermogenetic stimulation. All relevant experiment parame-  
190 ters and time-series data were output for offline analysis through a custom MATLAB framework

191 (see Materials and methods).

192 Optogenetic and thermogenetic stimulation efficiency verified by behavioural readout  
193 We conducted proof-of-principle experiments to ensure that our set-up could be successfully used  
194 for optogenetic stimulation (**Figure 2A**). *Ohyama et al. (2015)* have identified two GAL4 lines ex-  
195 pressed in neurons whose activation triggers strong rolling behaviour. *69F06-Gal4* drives expres-  
196 sion in command neurons for rolling, whereas *72F11-Gal4* drives expression in the Basin neurons,  
197 which integrate mechanosensory and nociceptive stimuli. *Klapoetke et al. (2014)* have developed  
198 the red-shifted channelrhodopsin *CsChrimson*, which can be expressed under GAL4 control. We  
199 tested whether *69F06-Gal4 x UAS-CsChrimson* and *72F11-Gal4 x UAS-CsChrimson* larvae rolled upon  
200 exposure to red light (**Figure 2B**, see also Materials and methods). In each stimulation cycle, we  
201 observed above-threshold rolls in over 40% of *69F06-Gal4 x UAS-CsChrimson* larvae and over 70%  
202 of *72F11-Gal4 x UAS-CsChrimson* larvae. This behaviour significantly contrasted with that of *attP2 x*  
203 *UAS-CsChrimson* control larvae (**Figure 2C**), suggesting that the DMDs could be used for optogenetic  
204 stimulation without activating the animals' photoreceptors.

205 We also verified the efficacy of the galvanometer set-up for thermogenetic stimulation (**Fig-**  
206 **ure 2D**). We tested whether *69F06-Gal4 x UAS-dTrpA1* and *72F11-Gal4 x UAS-dTrpA1* larvae rolled  
207 upon exposure to the IR laser (**Figure 2E**, see also Materials and methods). In each stimulation  
208 cycle, we observed above-threshold rolls in over 70% of *69F06-Gal4 x UAS-dTrpA1* larvae and over  
209 35% of *72F11-Gal4 x UAS-dTrpA1* larvae; a significant contrast to the *attP2 x UAS-dTrpA1* control lar-  
210 vae whose roll rate was close to zero. We concluded that these heating conditions were effective  
211 for targeted *Trp* channel activation without larvae perceiving strong pain (**Figure 2F**).

## 212 **Operant conditioning of larval bend direction**

213 We chose optogenetic activation of reward circuits as a US for automated operant conditioning.  
214 The main challenge was determining which neurons could convey a sufficient reinforcement sig-  
215 nal, especially as the capacity for *Drosophila* larvae to exhibit operant learning was not yet demon-  
216 strated. Across the animal kingdom, it has been observed that biogenic amine neurotransmitters  
217 can provide such a signal (*Giurfa, 2006; Hawkins and Byrne, 2015; Meneses and Liy-Salmeron, 2012;*  
218 *Fee and Goldberg, 2011*). It is also conceivable that the *Drosophila* PAM cluster dopaminergic neu-  
219 rons that can signal reward in classical conditioning (*Rohwedder et al., 2016; Liu et al., 2012; Vogt*  
220 *et al., 2014; Cognigni et al., 2018; Waddell, 2013*) may perform similarly in operant conditioning.  
221 We therefore aimed to induce operant conditioning by stimulating a broad set of dopaminergic  
222 and serotonergic neurons. If valence signalling relevant for operant conditioning is mediated by  
223 one of these two neurotransmitters, activation of this large set of neurons paired with behaviour  
224 should be sufficient to induce learning.

225 We expressed *UAS-CsChrimson* under the control of the *Ddc-Gal4* driver, which covers a large  
226 set of dopaminergic and serotonergic neurons in the CNS (*Li et al., 2000; Sitaraman et al., 2008;*  
227 *Lundell and Hirsh, 1994*), including the PAM cluster (*Liu et al., 2012; Aso et al., 2012*). Although the  
228 function of most *Ddc* neurons is unknown, their collective activation can substitute for an olfactory  
229 conditioning reward in adult flies (*Liu et al., 2012; Shyu et al., 2017; Aso et al., 2012*). The goal  
230 of our paradigm was to establish a learned direction preference for bending, conditioning *Ddc-*  
231 *Gal4 x UAS-CsChrimson* larvae to bend more often to one side than the other. Although stimulation  
232 side was randomized across trials, we describe (for simplicity) the experiment procedure where  
233 this predefined side was the left. Each experiment began with a one-minute test period where  
234 no light was presented. What followed were four training sessions, each three-minutes long, in  
235 which larvae received optogenetic stimulation when bending to the left. Between training sessions,  
236 larvae experienced three minutes without stimulation. Larvae were periodically brushed back to  
237 the centre of the agarose plate to mitigate the experimental side effects of reaching the plate's  
238 edge (see Materials and methods for more details). Following the fourth training session was a  
239 one-minute test period without stimulation (**Figure 3A**).

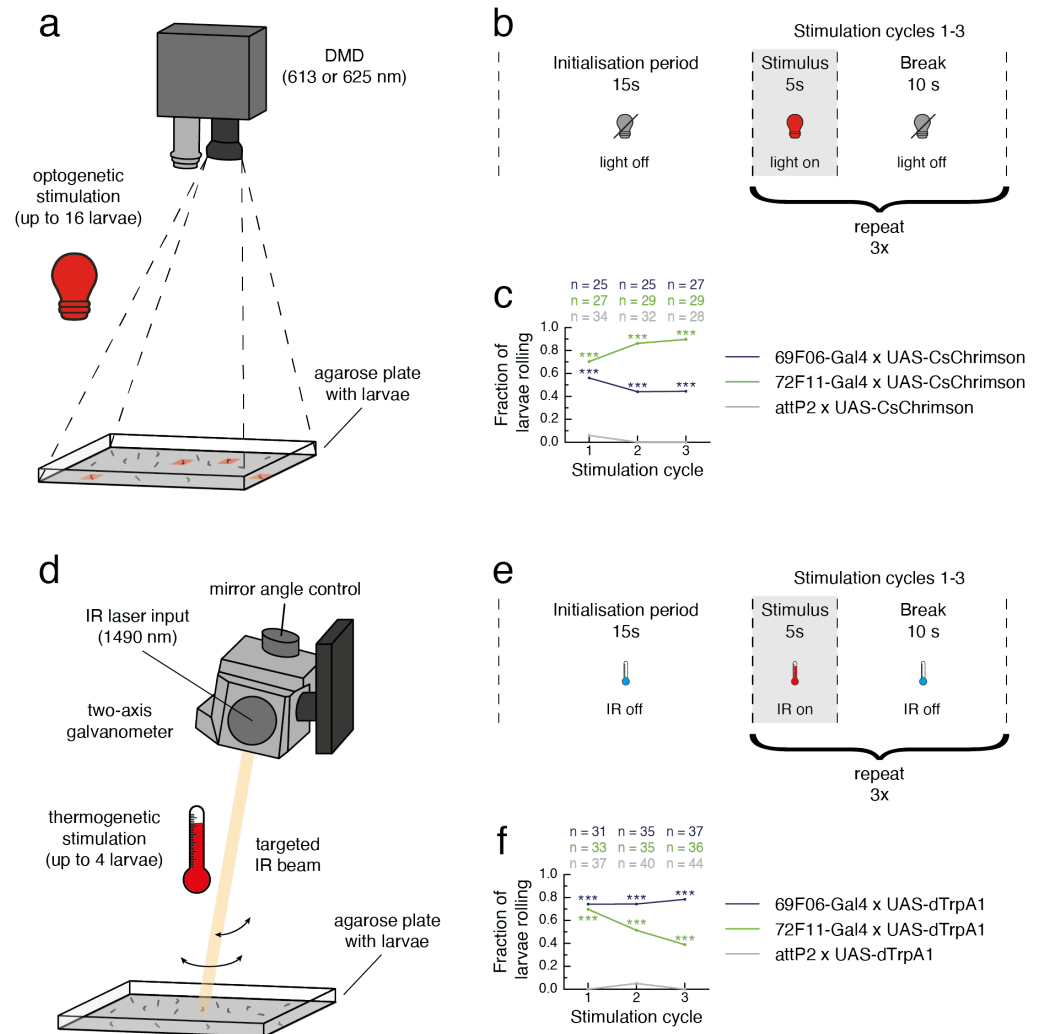

**Figure 2. Optogenetic and thermogenetic stimulation with the high-throughput tracker.** **a.** Hardware design schematic for optogenetic stimulation. Although the high-throughput tracker included two digital micromirror devices (DMDs), only one is shown for simplicity. **b.** Proof-of-principal experiment protocol for optogenetic stimulation. **c.** The fraction of larvae for which a roll was detected in each stimulation cycle. 69F06-Gal4 x UAS-CsChrimson and 72F11-Gal4 x UAS-CsChrimson larvae (CsChrimson expressed in neurons triggering roll behaviour; experiment groups) were compared to attP2 x UAS-CsChrimson larvae (no CsChrimson expression; control group). Fisher's exact test was used to calculate statistical differences between the experiment and control groups (\*\*\*)  $p < 0.001$ . **d.** Hardware design schematic for thermogenetic stimulation. Although the high-throughput tracker included four two-axis galvanometers, only one is shown for simplicity. IR: infrared. **e.** Proof-of-principal experiment protocol for thermogenetic stimulation. **f.** The fraction of larvae for which a roll was detected in each stimulation cycle. 69F06-Gal4 x UAS-dTrpA1 and 72F11-Gal4 x UAS-dTrpA1 larvae (dTrpA1 expressed in neurons triggering roll behaviour; experiment groups) were compared to attP2 x UAS-dTrpA1 larvae (no dTrpA1 expression; control group). Fisher's exact test was used to calculate statistical differences between the experiment and control groups (\*\*\*)  $p < 0.001$ .

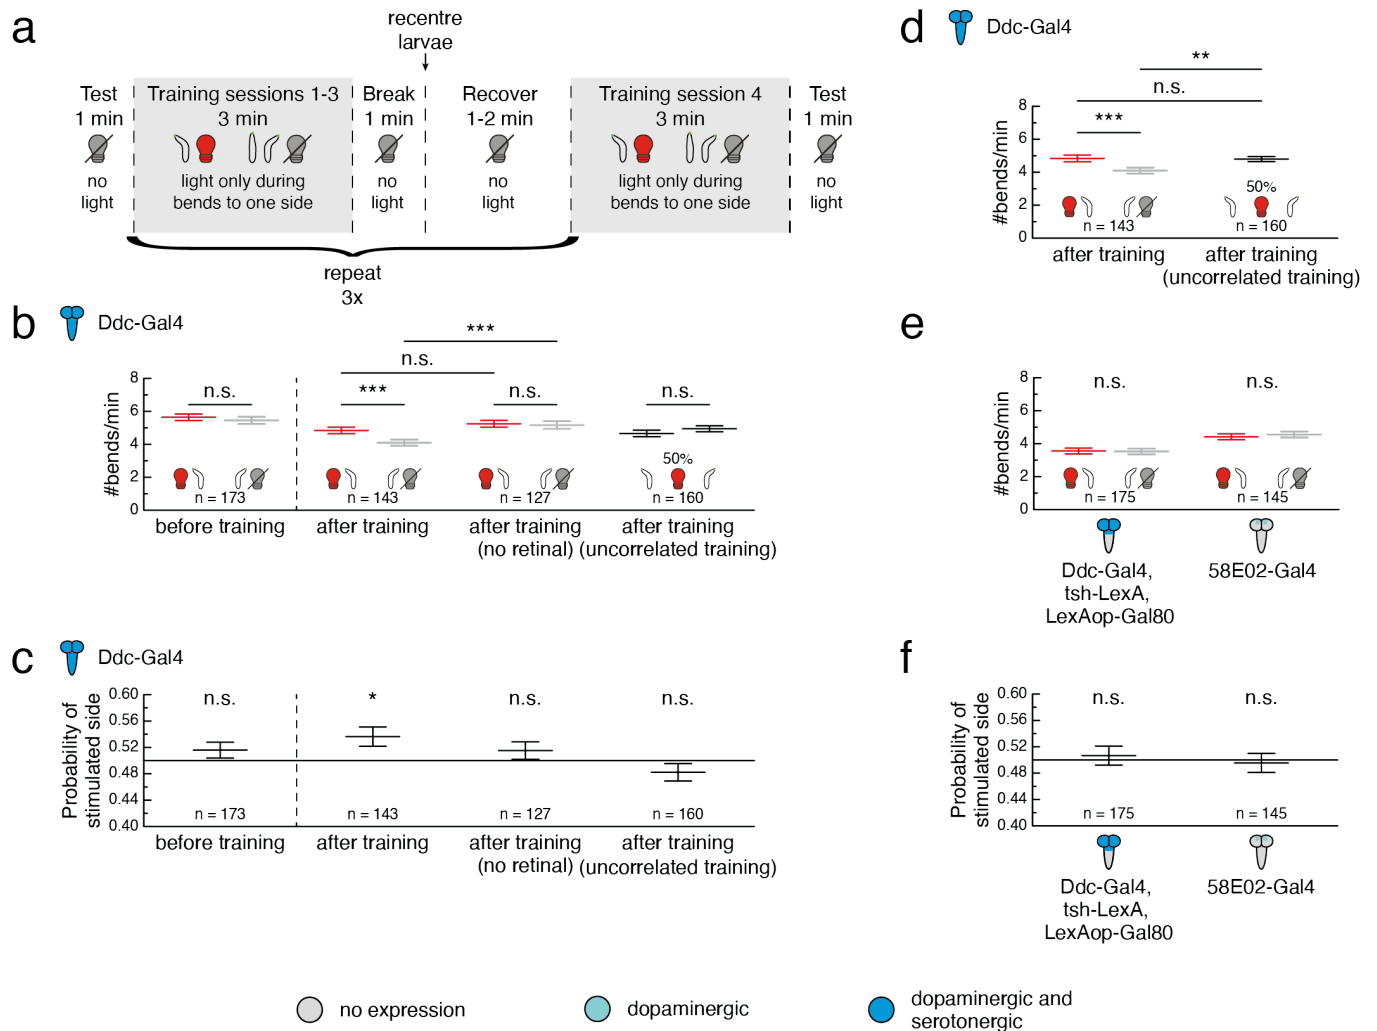

**Figure 3. Operant conditioning of bend direction in *Drosophila* larvae requires the ventral nerve cord.** **a.** Experiment protocol using the high-throughput closed-loop tracker. Behaviours are depicted as larval contours (black) with head (green). During training, the larva received an optogenetic stimulus (red light bulb) whenever it bent to one predefined side (here depicted as the left for simplicity), and light was switched off during all other behaviours (grey light bulb). **b,d,e.** Larval bend rate shown as the number of bends per minute, grouped by bend direction. The bend rate to the stimulated side (depicted as a left bend with a red light bulb for simplicity) is shown in red and the bend rate to the unstimulated side (depicted as a right bend with a grey light bulb for simplicity) is shown in grey. For larvae that received random, uncorrelated stimulation during 50% of bends, the bend rates to the left and right are shown in black. Statistical differences within groups were tested with a two-sided Wilcoxon signed-rank test; statistical differences between two groups were tested with a two-sided Mann-Whitney *U* test. **c,f.** Probability that a given bend was directed towards the stimulated side or, in the case of the uncorrelated training group, towards the left. Grey line indicates equal probability of 0.5 for bends to either side. Statistics calculated from a two-sided Wilcoxon signed-rank test. **b-f.** Gal4 expression depicted as color-coded CNS. All data is shown as (mean  $\pm$  s. e. m.). n. s.  $p \geq 0.05$  (not significant), \*  $p < 0.05$ , \*\*  $p < 0.01$ , \*\*\*  $p < 0.001$ . **b.** Bend rate for *Ddc-Gal4*  $\times$  *UAS-CsChrimson* larvae. Data is shown from the test period before the first training session and the test period after the fourth training session. **c.** Data from same experiments as in **b.** **d.** Same data as in **b**, but bend rate for uncorrelated training group was calculated without stratification by bend direction. **e.** Bend rate for *Ddc-Gal4*  $\times$  *UAS-CsChrimson*; *tsh-LexA*, *LexAop-Gal80* and *58E02-Gal4*  $\times$  *UAS-CsChrimson* larvae. The effector, *UAS-CsChrimson*, is omitted from the figure for visual clarity. Data is shown from the test period immediately following the fourth training session. **f.** Data from same experiments as in **e.**

**Figure 3-Figure supplement 1.** *Ddc-Gal4* expression pattern without and with *tsh-Gal80* restriction.

240 For each larva, two measures served as a read-out for bend direction preference: i) the bend  
241 rate, measured as the number of bends per minute performed towards a given side, and ii) the  
242 probability that a given bend was directed towards the stimulated side, obtained by normalising  
243 the bend rate with the total number of bends performed by the larva in that minute. Individual  
244 larva variation in bend rate yielded different results for these measures at the population level. In  
245 the one-minute test prior to the first training session, we observed no significant difference in larval  
246 bend rate to either side and the likelihood of these naïve animals choosing one side over the other  
247 was not significantly different from chance. In the one-minute test following the fourth training  
248 session, larvae showed a preference for bends towards the side paired with red light stimulation  
249 during training, and the probability of these larvae bending towards this previously stimulated side  
250 was significantly greater than 50% (**Figure 3B**).

251 The light-dependent activation of neurons using *CsChrimson* requires a cofactor, retinal, which  
252 we supplemented in the food during development (*Klapoetke et al., 2014*; see Materials and meth-  
253 ods). A control group of larvae raised on food without retinal showed no significant difference  
254 in absolute bend rate (**Figure 3B**) or bend direction probability (**Figure 3C**) throughout the exper-  
255 iment. This suggested that the US, which triggered a learned direction preference for bends in  
256 larvae raised on retinal, was indeed the collective activation of all *Ddc* neurons and not the red  
257 light itself. Notably, when directly comparing larvae raised with retinal to this control group raised  
258 without, the two groups showed no significant difference in the bend rate towards the stimulated  
259 side. Instead, the bend rate towards the unstimulated side was significantly reduced in larvae that  
260 received paired training compared to this control (**Figure 3B**). This raised the question whether  
261 larvae were learning to prefer the side paired with the rewarding US, or rather to avoid the side  
262 without the stimulus.

263 To confirm that the bend preference we observed after training was attributable to pairing  
264 light with bends solely in one direction, we conducted another control experiment in which lar-  
265 vae received random, uncorrelated stimulation during 50% of bends regardless of direction. After  
266 training, larvae showed neither a difference in absolute left and right bend rates, nor a significant  
267 probability of choosing one side over the other (**Figure 3B, Figure 3C**). These bend rates aver-  
268 aged together were indistinguishable from those of pair-trained larvae as they bent to the previ-  
269 ously stimulated side. However, larvae which received uncorrelated training showed a significantly  
270 higher bend rate overall compared to pair-trained larvae bending to the previously unstimulated  
271 side (**Figure 3D**).

## 272 **The mushroom body is not sufficient to mediate operant conditioning in larvae**

273 Our experiments showed that activation of *Ddc* neurons is a sufficient US for operant conditioning.  
274 While we did not identify which individual neurons mediate the observed effect, we hypothesised  
275 that not all *Ddc* neurons are involved. Some prior work in adult flies suggests that the MB is involved  
276 in operant conditioning (*Sun et al., 2020*), while other studies in the adult suggest that operant con-  
277 ditioning does not require the MB (*Booker and Quinn, 1981; Wolf et al., 1998; Colomb and Brembs,*  
278 **2010, 2016**) and may instead involve motor neuron plasticity (*Colomb and Brembs, 2016*). The ex-  
279 tent to which the MB is dispensable in larval operant conditioning is unknown. We investigated  
280 whether smaller subsets of *Ddc* neurons in the brain and subesophageal zone (SEZ) could support  
281 memory formation in our bend direction paradigm.

282 GAL80 under control of the *tsh* promoter suppresses GAL4 expression in the ventral nerve cord  
283 (VNC), but not in the brain or SEZ (*Clyne and Miesenböck, 2008; Figure 3–Figure Supplement 1*).  
284 When trained under our operant conditioning protocol (**Figure 3A**), *Ddc-Gal4 x UAS-CsChrimson; tsh-*  
285 *LexA, LexAop-Gal80* larvae were equally likely to bend towards the side where they had previously  
286 received the optogenetic stimulus as they were to bend towards the unstimulated side (**Figure 3E,**  
287 **Figure 3F**). Activating these neurons was thus an insufficient rewarding US in this paradigm. The  
288 loss of the operant conditioning effect we observed with *Ddc-Gal4 x UAS-CsChrimson* larvae high-  
289 lighted the necessity of dopaminergic or serotonergic neurons in the VNC for the formation of a



290 bend direction preference. Their sufficiency was inconclusive, however, since perhaps two or more  
291 distinct groups of *Ddc* neurons needed collective activation in order to form a memory.

292 We then assessed whether exclusively activating the PAM cluster dopaminergic neurons inner-  
293 vating the MB could induce operant conditioning, as is the case for classical conditioning. *58E02-*  
294 *Gal4* drives expression in the majority of these neurons (*Rohwedder et al., 2016*). *58E02-Gal4 x UAS-*  
295 *CsChrimson* larvae did not develop any direction preference for bends following training (*Figure 3E,*  
296 *Figure 3F*). It is unsurprising that activation of these neurons alone could not act as a rewarding  
297 US in this paradigm, given our finding that *Ddc* neurons in the brain and SEZ are insufficient. It is  
298 remarkable, however, because it suggests that the neural circuits signalling reward in operant con-  
299 ditioning differ from those of classical conditioning. Although it remains to be seen whether these  
300 PAM cluster neurons contribute to memory formation by interacting with other *Ddc* neurons, these  
301 results further supported the idea that operant conditioning in *Drosophila* may not be mediated  
302 by the MB.

### 303 **Serotonergic neurons in brain and SEZ are a sufficient reward signal in classical** 304 **conditioning**

305 Pairing an action with activation of numerous dopaminergic and serotonergic neurons across the  
306 CNS was sufficient to induce operant conditioning of bend direction preference. Furthermore, our  
307 results indicated that the VNC subset of these neurons was essential for memory formation in the  
308 paradigm. It was an open question, however, whether this learning was mediated by dopamine,  
309 serotonin, or both. Dopamine and serotonin receptors are necessary for different classical con-  
310 ditioning tasks in honeybees, suggesting that the two neurotransmitters may carry out separate  
311 functions (*Wright et al., 2010*). We conducted a high-throughput classical conditioning screen of  
312 sparser dopaminergic and serotonergic driver lines to identify US candidates for comparison with  
313 our operant conditioning paradigm.

314 We expressed *CsChrimson* under the control of different GAL4 driver lines and tested whether  
315 pairing optogenetic activation of these neurons (US) with odour presentation (CS) could induce  
316 olfactory memory. Conditioning was performed using a similar procedure to those described in  
317 *Gerber and Hendel (2006)*, *Saumweber et al. (2011)* and *Eschbach et al. (2020b)*. In the paired  
318 group, larvae were exposed to alternating three-minute presentations of ethyl acetate with red  
319 light and air with no light. To ensure that any observed effects were a result of learning rather  
320 than innate odour preference or avoidance, an unpaired group was trained simultaneously with  
321 reciprocal stimulus presentation (odour/dark, air/light). Following training, larvae in both groups  
322 were tested on their preference for the odour in the absence of light (*Figure 4A*). All learning scores  
323 were compared to a negative control containing no GAL4 driver, *w<sup>1118</sup> x UAS-CsChrimson*, which  
324 did not exhibit a learning phenotype (*Figure 4B*). Consistent with prior study results (*Rohwedder*  
325 *et al., 2016*; *Eichler et al., 2017*; *Almeida-Carvalho et al., 2017*), *58E02-Gal4 x UAS-CsChrimson* larvae  
326 showed appetitive olfactory learning with a significantly higher performance index than *w<sup>1118</sup> x UAS-*  
327 *CsChrimson* larvae and so were used as a positive control (*Figure 4B*). *Ddc-Gal4 x UAS-CsChrimson*  
328 larvae exhibited appetitive memory comparable to *58E02-Gal4* ( $p = 0.1304$ , two-sided Mann-Whitney  
329 *U* test); an unsurprising result since the *Ddc-Gal4* expression pattern includes the PAM cluster neu-  
330 rons. Consistent with previous studies in the larva (*Schroll et al., 2006*) and adult (*Aso et al., 2012*;  
331 *Claridge-Chang et al., 2009*; *Liu et al., 2012*), *TH-Gal4 x UAS-CsChrimson* larvae exhibited significant  
332 aversive olfactory learning. *TH-Gal4* covers most dopaminergic neurons, excluding the PAM clus-  
333 ter (*Rohwedder et al., 2016*). The effect we observed may be mediated by punishment-signalling  
334 dopaminergic neurons that project to the MB vertical lobes (*Eschbach et al., 2020b*; *Selcho et al.,*  
335 *2009*). Isolating the locus of this effect may prove challenging, given the dearth of larval driver lines  
336 targeting dopaminergic neurons without MB innervation.

337 Serotonergic signalling is required for associative learning in both larval (*Huser et al., 2017*) and  
338 adult (*Johnson et al., 2011*; *Sitaraman et al., 2012*) *Drosophila*. We tested *Trh-Gal4* and *Tph-Gal4*,  
339 two driver lines that target the majority of serotonergic neurons and no dopaminergic neurons

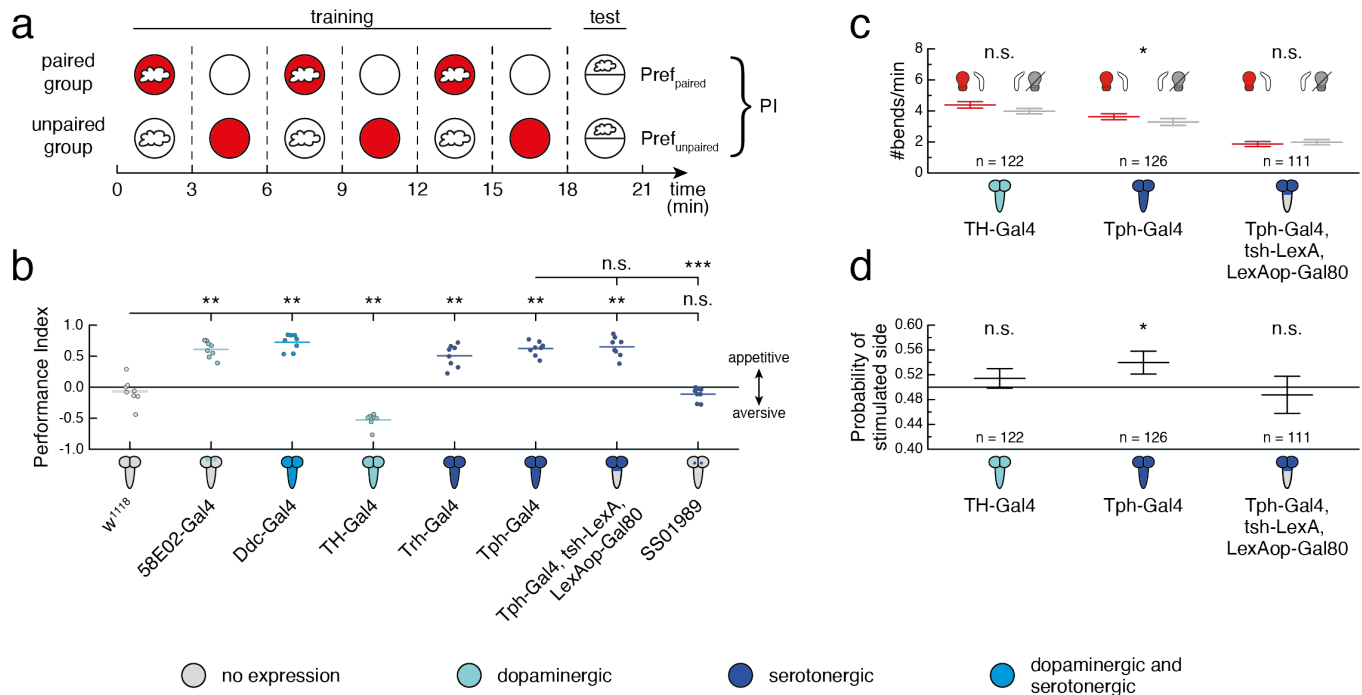

**Figure 4. Different serotonergic neurons mediate classical and operant conditioning.** All fly lines contained the *UAS-CsChrimson* effector, which is omitted from the figure for visual clarity. Gal4 expression depicted as color-coded CNS. **a.** Olfactory conditioning experiment protocol. During training, larvae in the paired group received three minutes of optogenetic red light stimulation (solid red circles) paired with the odour (white cloud) followed by three minutes of darkness (solid white circles) paired with air (no cloud). The unpaired group received reciprocal stimulus presentation (dark paired with odour, light paired with air). This procedure was repeated three times. In half of the experiments, the order of training trials was reversed, starting with air presentation instead of odour presentation. Both groups were then tested for learned odour preference in the dark with odour presented on one side of the plate and no odour on the other (PI = performance index). **b.** Performance indices following olfactory conditioning, plotted as raw data points and mean. *w<sup>1118</sup>* *x UAS-CsChrimson* was the negative control (grey,  $n = 8$ ), *58E02-Gal4 x UAS-CsChrimson* was the positive control (blue,  $n = 8$ ). Statistical comparisons to *w<sup>1118</sup>* *x UAS-CsChrimson* were calculated using a two-sided Mann-Whitney *U* test with Bonferroni correction; n.s.  $p \geq 0.05/7$  (not significant), \*\*  $p < 0.01/7$ . Statistical comparisons to *Tph-Gal4 x UAS-CsChrimson* were calculated using a two-sided Mann-Whitney *U* test with Bonferroni correction; n.s.  $p \geq 0.05/2$  (not significant), \*\*\*  $p < 0.001/2$ . **c,d.** All data is shown as (mean  $\pm$  s. e. m.), n.s.  $p \geq 0.05$  (not significant), \*  $p < 0.05$ . **c.** Experiments followed the protocol depicted in **Figure 3A**. Data is shown from the test period immediately following the fourth training session. Larval bend rate shown as the number of bends per minute, grouped by bend direction. The bend rate to the stimulated side (depicted as a left bend with a red light bulb for simplicity) is shown in red and the bend rate to the unstimulated side (depicted as a right bend with a grey light bulb for simplicity) is shown in grey. Statistical differences within a group were tested with a two-sided Wilcoxon signed-rank test. **d.** Probability that a given bend is directed towards the stimulated side. Grey line indicates equal probability of 0.5 for bends to either side. Statistics were based on a two-sided Wilcoxon signed-rank test.

**Figure 4-Figure supplement 1.** *Tph-Gal4* expression pattern without and with *tsh-Gal80* restriction.

**Figure 4-Figure supplement 2.** SS01989 exclusively drives expression in the CSD neuron.

**Figure 4-Figure supplement 3.** Paired and unpaired group data for olfactory conditioning experiments.

340 across the CNS of third-instar larvae (*Huser et al., 2012*). Consistent with previous reports (*Gan-*  
341 *guly et al., 2020*), larvae expressing *CsChrimson* under either driver line formed strong appetitive  
342 olfactory memory, highlighting the sufficiency of serotonin as a US in associative learning. *Tph-Gal4*  
343 targets fewer serotonergic neurons than *Trh-Gal4*, making it valuable for narrowing down which  
344 serotonergic neurons serve as a relevant reward signal. We eliminated all *Tph-Gal4* expression in  
345 the VNC using *tsh-Gal80* (**Figure 4–Figure Supplement 1**). Activating the remaining *Tph* neurons in  
346 the brain and SEZ was sufficient to induce strong appetitive memory (**Figure 4B**). This result was  
347 notable and raised further questions: are serotonergic neurons in the brain and SEZ indirectly  
348 connected to MB-innervating dopaminergic neurons or do alternative learning circuits exist that  
349 altogether bypass the MB?

350 The contralaterally projecting serotonin-immunoreactive deutocerebral (CSD) neuron (*Roy et al.,*  
351 *2007*) is one previously described serotonergic brain neuron within the *Tph-Gal4* expression pattern  
352 (*Huser et al., 2012*) that innervates the antennal lobe and only has a few indirect connections to  
353 the MB (*Berck et al., 2016*). Combining anatomical features from existing EM reconstruction (*Berck*  
354 *et al., 2016*) with available lineage information facilitated identification of a split-GAL4 line (*SS01989*)  
355 that drives expression exclusively in the CSD neuron (**Figure 4–Figure Supplement 2**). Pairing acti-  
356 vation of *SS01989* with ethyl acetate was insufficient for inducing olfactory memory (**Figure 4B**), sug-  
357 gesting that the classical conditioning phenotype we observed under *Tph-Gal4 x UAS-CsChrimson;*  
358 *tsh-LexA, LexAop-Gal80* was mediated by at least one other group of serotonergic neurons in the  
359 brain or SEZ.

### 360 **Serotonergic neurons in VNC are necessary for operant conditioning of bend direc-** 361 **tion**

362 Given their strong associative learning phenotypes, we used the *TH-Gal4* and *Tph-Gal4* drivers  
363 to investigate whether operant conditioning of bend direction could be induced exclusively by  
364 dopaminergic or serotonergic neurons, respectively. Under our high-throughput training proto-  
365 col (**Figure 3A**), *TH-Gal4 x UAS-CsChrimson* larvae showed no difference in bend rate between the  
366 previously stimulated and unstimulated sides in the one-minute test period (**Figure 4C**). Further-  
367 more, the probability that any given bend was directed towards the previously stimulated side was  
368 not significantly different from chance (**Figure 4D**). Activating these dopaminergic neurons was an  
369 insufficient substitute for reward or punishment in operant conditioning.

370 Paired activation of *Tph-Gal4* neurons during bends to one side resulted in a significantly higher  
371 bend rate to the stimulated side relative to the unstimulated side during the test period (**Figure 4C**).  
372 The probability of bending in the previously stimulated direction was also significantly elevated  
373 (**Figure 4D**). In this way, activation of *Tph*-positive serotonergic neurons paired with bends to one  
374 side was sufficient for the formation of a learned direction preference. Combining this result with  
375 the knowledge that operant conditioning was impaired following restriction of *Ddc-Gal4 x UAS-*  
376 *CsChrimson* expression to the brain and SEZ suggests that the serotonergic neurons of the VNC  
377 were necessary for memory formation in this paradigm. Because *Tph-Gal4* is a broad driver line, it  
378 is possible that its expression pattern contains brain or SEZ neurons outside of those in *Ddc-Gal4*.  
379 The existence of these neurons could have potentially induced learning through an alternate mech-  
380 anism independent from that which drove memory formation following *Ddc* neuron activation.

381 To assess whether the VNC serotonergic neurons were necessary for the observed operant  
382 conditioning effect, we used *tsh-Gal80* to restrict the *Tph-Gal4* expression pattern to the brain and  
383 SEZ. Paired optogenetic activation of *Tph-Gal4 x UAS-CsChrimson; tsh-LexA, LexAop-Gal80* with larval  
384 bends to one side was insufficient for operant conditioning (**Figure 4C, Figure 4D**). The *Tph-Gal4*  
385 expression pattern contains two neurons per VNC hemisegment (with the exception of a single  
386 neuron in each A8 abdominal hemisegment), all of which are serotonergic (*Huser et al., 2012*).  
387 While there are few serotonergic VNC candidates, we could not conclude from our data whether  
388 the operant conditioning effect relied solely on these neurons or whether synergistic activity from  
389 both the VNC and the brain or the SEZ was needed. Testing these hypotheses remains challenging

390 since, to our knowledge, no sparse driver lines exist to exclusively target VNC serotonergic neurons.  
391 Under a classical conditioning paradigm, we have confirmed that there exist learning pathways  
392 in *Drosophila* that rely on serotonergic neurons. We have also shown that serotonergic neurons can  
393 serve as a sufficient US for operant conditioning. Notably, different circuit mechanisms underlie  
394 classical and operant conditioning mediated by serotonergic neurons: activation of the brain and  
395 SEZ is sufficient for classical conditioning, whereas the VNC is necessary for operant conditioning.

## 396 Discussion

397 Due to available genetic tools and the emerging connectome, the *Drosophila* larva is a uniquely  
398 advantageous model organism for neuroscience. We have uncovered a previously unknown neu-  
399 ronal mechanism of operant conditioning in the *Drosophila* larva. Serotonergic signalling can be  
400 employed as a reinforcing US in both classical and operant associative learning, but we are mind-  
401 ful that a single neural mechanism for learning may not exist. Distinct types of learning may share  
402 neurotransmitters or circuit components, but there may remain fundamental differences in con-  
403 nectivity and function. The experimental system we built was instrumental in investigating the  
404 neural circuits of operant conditioning, as it combined FPGA-based real-time tracking of multiple  
405 larvae with robust online behaviour detection and closed-loop stimulus presentation. This system  
406 could facilitate further research in taxis (Luo *et al.*, 2010; Gomez-Marin *et al.*, 2011; Kane *et al.*,  
407 2013; Jovanic *et al.*, 2019), decision-making (Krajbich, 2019; DasGupta *et al.*, 2014), and spatial nav-  
408 igation and memory (Neuser *et al.*, 2008; Haberkern *et al.*, 2019). While further work is necessary,  
409 our bend direction paradigm provides a strong foundation for continued study of the circuit and  
410 cellular mechanisms underlying operant conditioning.

## 411 High-throughput operant conditioning in *Drosophila* larvae

412 We have shown that *Drosophila* larvae are capable of operant conditioning and that optogenetic  
413 activation of *Ddc* neurons serves as a rewarding US during this learning process. With training,  
414 larvae formed an association between the presence or absence of this US and the direction in which  
415 they were bending. During testing, in the absence of any stimulation, larvae showed a significant  
416 learned preference for bending towards the previously stimulated side. This learned modification  
417 of future behaviour was only observed when the CS and US were paired during training; a hallmark  
418 of operant conditioning. Because *Ddc-Gal4* drives expression in dopaminergic and serotonergic  
419 neurons (Li *et al.*, 2000; Sitaraman *et al.*, 2008), we concluded that one or both neurotransmitters  
420 are involved in memory formation under these experiment conditions.

421 Strong parallels exist between our operant learning paradigm and those employed for condi-  
422 tioning direction preference in adult *Drosophila*. Consider the work of Nuwal *et al.* (2012), in which  
423 tethered flies walked on a rotating ball and were rewarded with optogenetic activation of sugar-  
424 sensing neurons upon turns to one direction. As a consequence of this pairing, the flies learned  
425 to increase the number of turns to this side. Notably, the nature of the US remains an important  
426 difference between these paradigms. Our initial attempts to operantly condition larvae using ac-  
427 tivation of sugar-sensing neurons as a rewarding US were unsuccessful. These neurons, defined  
428 by two different *Gr43a-Gal4* drivers, were also insufficient for memory formation when activated  
429 with a paired odour in an olfactory conditioning screen. This was surprising, considering extensive  
430 evidence that natural sugar can serve as a rewarding US for classical conditioning in larvae (Apos-  
431 tolopoulou *et al.*, 2013; Schleyer *et al.*, 2015; Weiglein *et al.*, 2019; Honjo and Furukubo-Tokunaga,  
432 2005; Neuser *et al.*, 2005; Rohwedder *et al.*, 2012; Scherer *et al.*, 2003; Schipanski *et al.*, 2008).  
433 One possible explanation for these discrepancies is that multiple groups of sensory neurons must  
434 be co-activated in order to relay a meaningful reward signal. Alternatively, it may be necessary to  
435 adjust the temporal pattern or intensity of optogenetic stimulation.

436 It remains to be seen whether operant learning can occur by pairing roll or back-up behaviour  
437 with reward or punishment. Conditioning these actions is challenging given their infrequency in  
438 naïve, freely behaving animals. Rolls only occur in response to noxious stimuli (Ohyama *et al.*, 2013,

439 **2015; Robertson et al., 2013; Tracey et al., 2003**). Back-ups also occur at very low rates (**Masson**  
440 **et al., 2020**). Consequently, the amount of US which larvae would receive during paired training  
441 would be very small, making observable memory formation more difficult. Our high-throughput  
442 tracker could potentially address this challenge with probabilistic, thermogenetic activation of roll  
443 or back-up command neurons (**Ohyama et al., 2015; Carreira-Rosario et al., 2018**) and optogenetic  
444 reward when performing the desired action.

### 445 **Neural circuits of operant conditioning**

446 From the available data, it cannot be concluded that the brain and SEZ are dispensable for operant  
447 conditioning in *Drosophila* larvae. Examples from both vertebrates (**Grau et al., 1998**) and  
448 invertebrates (**Horridge, 1962; Booker and Quinn, 1981**) show the spinal cord or VNC as sufficient  
449 for learning, suggesting that conserved mechanisms exist for brain-independent operant condi-  
450 tioning across species. This does not, however, exclude the possibility that there exist alternative  
451 learning pathways using the brain. In mammals (**Redgrave et al., 2011; Balleine et al., 2009**) and  
452 birds (**Fee and Goldberg, 2011**), brain correlates of operant conditioning have been identified. It is  
453 unclear where such pathways would be located in the insect brain. Both our larval experiments  
454 and previous adult fly studies (**Colomb and Brembs, 2016; Wolf et al., 1998; Colomb and Brembs,**  
455 **2010; Booker and Quinn, 1981**) support the idea that operant conditioning can occur independently  
456 of the MB, such that other learning centres might exist. To determine whether larval operant con-  
457 ditioning can be fully mediated by the VNC or whether the brain or SEZ are necessary, new driver  
458 lines must be created. A collection of sparse split-GAL4 lines, each specific to a distinct group of  
459 serotonergic neurons, could help identify the minimum subset of neurons necessary for conveying  
460 a US in our bend direction paradigm.

461 Even if the learning signal for operant conditioning can be mapped to a few serotonergic neu-  
462 rons, there remain several open questions regarding the neuronal mechanisms underlying this  
463 learning. Locally, neurons could drive synaptic plasticity or modulate the intrinsic excitability of  
464 their postsynaptic partners. Alternatively, the learning signal could propagate further downstream,  
465 yielding learning correlates elsewhere in the network. Furthermore, memory formation requires  
466 integrating the US with information about the occurrence of the reinforced action. Motor feedback  
467 (e. g. efference copy, **Webb, 2004; Fee, 2014**) or proprioceptive input could be used to transmit this  
468 movement signal to higher-level circuits for convergence with the valence-encoding US. However,  
469 if memory formation occurred at a lower level, the action-specific signal and associated valence  
470 could be locally integrated inside the motor or premotor neuron without the need for feedback  
471 loops.

472 **Lorenzetti et al. (2008)** proposed intracellular mechanisms for modulating the intrinsic excitabil-  
473 ity of the *Aplysia* premotor neuron B51 during operant conditioning, mediated by the highly con-  
474 served protein kinase C (PKC) gene. PKC signalling is also essential for operant conditioning in *Lym-*  
475 *naea* (**Rosenegger and Lukowiak, 2010**) and adult *Drosophila* (**Brembs and Plendl, 2008; Colomb**  
476 **and Brembs, 2016**). If the *Drosophila* larva showed evidence of PKC-induced motor neuron plas-  
477 ticity, EM reconstruction of the pathways between the serotonergic neurons of the VNC and the  
478 PKC-positive motor neurons could further elucidate the mechanisms of memory formation and  
479 retrieval. A similar investigation of the *Drosophila* gene *FoxP* may also be informative, as its muta-  
480 tion in the adult results in impaired operant self-learning (**Mendoza et al., 2014**). The vertebrate  
481 homologue *FOXP2* is associated with deficits in human speech acquisition (**Lai et al., 2001**), song  
482 learning in birds (**Haesler et al., 2007**), and motor learning in mice (**Groszer et al., 2008**).

### 483 **Serotonin as a learning signal**

484 A limited set of studies have shown that serotonergic signalling is sufficient to induce learning (**Liu**  
485 **et al., 2014; Hawkins and Byrne, 2015; Ganguly et al., 2020**). Previous *Drosophila* studies highlight  
486 other roles of serotonin in associative learning (**Yu et al., 2005; Keene et al., 2004, 2006; Lee et al.,**  
487 **2011; Huser et al., 2017**). **Sitaraman et al. (2012)** have shown that synaptic transmission from sero-



488 tonergic neurons is essential for appetitive olfactory conditioning in the adult. Aversive olfactory  
489 memory formation is impaired in flies fed with a tryptophan hydroxylase inhibitor which blocks  
490 serotonin biosynthesis (*Lee et al., 2011*). Furthermore, serotonin receptor signalling is required  
491 for memory formation in classical conditioning tasks (*Johnson et al., 2011*). In larvae, aversive ol-  
492 factory conditioning is impaired by either ablation of serotonergic neurons during development or  
493 mutations in a serotonin receptor gene (*Huser et al., 2017*).

494 Our work suggests a novel role of serotonin as a reward signal for learning in *Drosophila* larvae.  
495 In our olfactory classical conditioning screen, optogenetic stimulation of serotonergic neurons in  
496 the brain and SEZ was sufficient to induce strong appetitive learning. Conversely, operant con-  
497 ditioning necessitated serotonergic neuron activity in the VNC. Since it remains unclear to what  
498 extent serotonergic neurons in the brain and SEZ are also involved in the operant conditioning  
499 effect we observed, it is possible that some neurons mediate both forms of associative learning.

500 Further investigation is necessary to better understand the function of serotonin in memory  
501 formation. It is possible that even a single instance of learning leads to a variety of changes across  
502 the nervous system. In the case of operant conditioning, higher brain centres, motor command  
503 neurons, premotor circuits and motor neurons would all qualify as potential learning sites. In addi-  
504 tion to thoroughly analysing the expression patterns of driver lines used in our classical condition-  
505 ing screen, developing new, sparse driver lines targeting serotonergic neurons would be valuable  
506 for identifying the minimal subset of neurons which provide the serotonergic learning signal. The  
507 larval connectome could be used to subsequently trace the paths from these neurons to the MB.  
508 One could then test whether learning as induced by the serotonergic US remains intact when these  
509 connections are silenced. The expression pattern of serotonin receptors could also provide clues  
510 about how the serotonergic signal triggers learning. One should certainly consider the possibil-  
511 ity that learning is not induced by serotonin itself, but by other neurotransmitters coexpressed by  
512 serotonergic neurons. This could be assessed by suppressing serotonin biosynthesis in the desired  
513 neuronal subset.

## 514 **Materials and methods**

### 515 **High-throughput closed-loop tracker**

#### 516 Hardware set-up

517 A high-resolution camera (3072 x 3200 pixels) (#TEL-G3-CM10-M5105, Teledyne DALSA, Ontario,  
518 Canada) positioned above a 23 cm x 23 cm 4% agarose plate captured 8-bit greyscale images at  
519 20 Hz. The agarose plate was illuminated from below by a 30 cm x 30 cm 850 nm LED backlight  
520 (#SOBL-300x300-850, Smart Vision Lights, Norton Shores, Michigan) equipped with intensity con-  
521 trol (#IVP-C1, Smart Vision Lights, Norton Shores, Michigan). An 800 nm longpass filter (#LP800-  
522 40.5, Midwest Optical Systems, Palatine, Illinois) mounted on the camera blocked all visible wave-  
523 lengths, including those used for optogenetics. When the agarose plate comprised most of the  
524 camera image, each pixel corresponded to a 72.92  $\mu\text{m}$  diameter section of the plate.

525 Each camera image was processed in parallel on both the host computer (#T7920, running  
526 Windows 10, Dell Technologies Inc, Round Rock, Texas) and an FPGA device (#PCIe-1473R-LX110,  
527 National Instruments, Austin, Texas). LabVIEW 2017 (National Instruments, Austin, Texas) software  
528 extracted larval contours and interfaced with C++ software that performed real-time behaviour de-  
529 tection. The LabVIEW software controlled closed-loop optogenetic and thermogenetic stimulation  
530 in response to these detected behaviours.

#### 531 Multi-animal detection and tracking

532 Raw camera images were read by the FPGA at 20 Hz and then sent to the host computer. The Lab-  
533 VIEW process on the host computer then filtered out non-larval objects by combining background  
534 subtraction and binary thresholding. The remaining objects were each enclosed in a rectangular  
535 box of minimal size, with edges parallel to the camera image axes. We defined the following criteria  
536 to detect third-instar larvae within these boxes:

- 537 • Pixel intensity range (default 25–170): the minimum and maximum brightness values for
- 538 pixels selected by binary thresholding (between 0 and 255 for an 8-bit image).
- 539 • Box side length (pixels) (default 6–100): the range of eligible values for width and height of
- 540 each box.
- 541 • Box width + height (pixels) (default 12–200): the range of eligible values for the sum of each
- 542 box's width and height.
- 543 • Box area (pixels) (default 300–900): the range of eligible values for the area of each box.

544 To track larvae over time, the host computer assigned a numerical identifier to each eligible object.  
545 We used distance-based tracking with a hard threshold of 40 pixels to maintain larval ID based  
546 on `centroid` position. Although identity was lost when larvae touched or reached the plate's edge,  
547 new IDs were generated when larvae matched detection criteria. For each of the largest 16 objects,  
548 the host computer sent a binary pixel pattern and location (defined as the centre of the box) to the  
549 FPGA. Since the host computer required more than 50 ms of run time for object detection, this  
550 process was not executed in every frame. On average, the FPGA received updated objects and  
551 their locations every three frames.

552 The FPGA extracted object contours in three steps. Within a 2 cm<sup>2</sup> region of interest around the  
553 object's centre, the FPGA first applied a user-defined binary threshold, then applied both vertical  
554 and a horizontal convolution with a 2 x 1 XOR kernel, and finally generated edge pixels by com-  
555 bining the results of the two convolutions using an OR operation. Contours were extracted from  
556 edge images using the Moore boundary tracing algorithm (*Gonzalez and Woods, 2018*) with three  
557 added error capture procedures. First, if the algorithm yielded a contour that ended prematurely  
558 or contained small loops, the construction process could be reversed by up to 16 contour points to  
559 find an alternative contour. Second, 10,000 FPGA clock cycles ( $\approx 100$  us) was the maximum allotted  
560 execution time, with each pixel comparison occurring within one clock cycle. In the rare event that  
561 this window was exceeded, the algorithm returned the already constructed contour points. Third,  
562 a contour containing fewer than 63 points was rejected and the FPGA returned the last valid con-  
563 tour detected for a given larva ID. The algorithm stopped when none of the remaining neighbours  
564 were edge pixels (*Figure 1–Figure Supplement 1*).

#### 565 Contour processing and landmark detection

566 An undesired result of the FPGA contouring algorithm was the variable number of contour points  
567 across larvae and frames. We aimed to detect behaviour based on a smooth contour with a fixed  
568 number of 100 contour points. This contour regularization was achieved inside the Behaviour Pro-  
569 gramme using Fourier decomposition and reconstruction as in *Masson et al. (2020)*.

570 The initial detection of head and tail was implemented on FPGA. The larva's head and tail were  
571 defined as the contour points with the sharpest and second-sharpest curvature, respectively (*Fig-  
572 ure 1–Figure Supplement 2*). While correct in most cases, this calculation sometimes led to flipped  
573 detection of the two body ends. The Behaviour Programme flagged and corrected these false de-  
574 tection events at run time by calculating the distance head and tail traveled between frames and  
575 tracking the number of correct versus flipped detection events. The vote system correction com-  
576 monly failed when the larva made large angle bends. The resulting contour was nearly-circular and  
577 exhibited similar curvature across all points. The solution required resetting the vote tallies when  
578 detecting these ball events (*Figure 1–Figure Supplement 2*).

579 We defined the larval spine as 11 points running along the central body axis from `head` to `tail`  
580 (*Figure 1–Figure Supplement 3; Swierczek et al., 2011*). In addition to `head` and `tail`, the Behaviour  
581 Programme calculated three equally distributed landmark points along the spine (`neck_top`, `neck`,  
582 and `neck_down`). A fourth landmark, the `centroid`, defined the larva's location. The six landmarks  
583 were collectively used to extract features for training behaviour classifiers (*Figure 1–Figure Supple-  
584 ment 3*).

585 The Behaviour Programme transformed the raw contour and spine from camera coordinates

586 (in pixels) to world coordinates (in mm). If stable larval detection criteria were met, all spine points  
587 were temporally smoothed using exponential smoothing (*Figure 1–Figure Supplement 3*).

## 588 Feature extraction

589 We developed a machine learning approach to address the high deformability of the larva shape,  
590 ensure live execution, reduce overfitting, and limit the volume of data tagging. What follows is a  
591 brief summary of larval features describing motion direction, body shape, and velocity that were  
592 calculated from the contour and spine data inside the Behaviour Programme. Features were de-  
593 signed as in *Masson et al. (2020)*, with notable modifications required to run the inference live:

### 594 1. Motion Direction (*Figure 1–Figure Supplement 4*)

- 595 • `direction_vector`: normalised vector describing the main body axis
- 596 • `direction_head_vector`: normalised vector describing the head axis
- 597 • `direction_tail_vector`: normalised vector describing the tail axis

### 598 2. Body Shape (*Figure 1–Figure Supplement 5*)

- 599 • `skeleton_length`: summed distances between consecutive spine points
- 600 • `perimeter`: summed distances between neighbouring contour points
- 601 • `larva_arc_ratio`: ratio of contour perimeter to convex hull perimeter (`larva_arc_ratio`  $\geq$   
602 1 and was close to 1 when larva was in either straight or ball-like shape)
- 603 • `larva_area_ratio`: ratio of the areas enclosed by the contour and its convex hull ( $0 \leq$   
604 `larva_area_ratio`  $\leq 1$  and was close to 1 when the larva was in either straight, heavily  
605 curved, or ball-like shape)
- 606 • `eig_reduced`:  $\text{eig\_reduced} = \frac{|\lambda_1 - \lambda_2|}{\lambda_1 + \lambda_2}$  where  $\lambda_1, \lambda_2$  were the eigenvalues of the structure  
607 tensor of the larval contour with respect to the neck ( $0 \leq \text{eig\_reduced} \leq 1$  and `eig_-`  
608 `reduced` decreased as the bend amplitude of the larva increased)
- 609 • `s`: normalised angle along the body ( $-0.5 \leq s \leq 1$ , was close to 1 when larva was straight,  
610 and decreased with increasing bend amplitude)
- 611 • `asymmetry`: sine of the angle between `direction_vector` and `direction_head_vector`  
612 (`asymmetry`  $> 0$  when larva bent left and `asymmetry`  $< 0$  when larva bent right)
- 613 • `angle_upper_lower`: absolute angle between `direction_vector` and `direction_head_-`  
614 `vector` (despite similarity to `asymmetry`, this develops different dynamics following tem-  
615 poral smoothing, which are valuable for stable left and right bend detection)

### 616 3. Velocity (*Figure 1–Figure Supplement 6*)

- 617 • Velocity of all six landmark points (`head_speed`, `neck_top_speed`, `neck_speed`, `neck_down_-`  
618 `speed`, `tail_speed`, and `v_centroid`) in mm/s over interval  $dt = 0.2\text{ s}$  (four frames)
- 619 • `v_norm`: arithmetic mean of `neck_top_speed`, `neck_speed`, and `neck_down_speed`, passed  
620 through a hyperbolic tangent activation function to suppress excessively large values
- 621 • `speed_reduced`: relative contribution of `neck_top_speed` to `v_norm`, passed through a  
622 hyperbolic tangent activation function to suppress excessively large values (`speed_re-`  
623 `duced` increased when the anterior larval body moved quickly compared to the posterior,  
624 e. g. when a bend was initiated)
- 625 • `damped_distance`: distance (mm) travelled by neck, giving greater weight to recent over  
626 past events
- 627 • `crab_speed`: lateral velocity (mm/s), defined as the component of `neck_speed` orthogonal  
628 to `direction_vector_filtered`
- 629 • `parallel_speed`: forward velocity (mm/s), defined as the component of `neck_speed_-`  
630 `filtered` parallel to `direction_vector_filtered`
- 631 • `parallel_speed_tail_raw`: tail's forward velocity (mm/s), defined as the component of  
632 `tail_speed_filtered` parallel to `direction_tail_vector_filtered`

633 • `parallel_speed_tail`: similar to `parallel_speed_tail_raw`, with the difference that `tail_`  
634 `speed_filtered` was normalised prior to calculating the dot product (i. e. a measure of  
635 tail movement direction which took values between -1 (backward) and +1 (forward))

To extract features in real time and address various sources of noise, we implemented exponential smoothing defined as follows for a given feature  $f$  (**Figure 1–Figure Supplement 7**):

$$f_{\text{filtered},t} = (1 - \alpha) \cdot f_{\text{filtered},t-\Delta t} + \alpha \cdot f_t$$

636 where  $t$  is unitless, but derived from the experiment time in seconds,  $\alpha = \frac{\Delta t}{\tau}$  with  $\Delta t = 0.05$  s and  
637  $\tau = 0.25$  s. Features that had the potential to exhibit large value deviations (e. g. `v_norm`) were  
638 instead bounded using a hyperbolic tangent function. Additionally, some features were exponentially  
639 smoothed over a longer time window (where  $\alpha_{\text{long}} = \frac{\Delta t}{\tau_{\text{long}}}$  with  $\Delta t = 0.05$  s and  $\tau_{\text{long}} = 5$  s)  
640 (**Figure 1–Figure Supplement 7**).

Convolution was used to approximate a smoothed squared derivative for each feature (**Figure 1–Figure Supplement 8**); useful for integrating information over time without needing to further expand the feature space. The underlying mathematical concepts were motivated by **Masson et al. (2012)**. For a given feature  $f$  at time  $t$ , `f_convolved_squared` was calculated as follows:

$$f1_t = (1 - \lambda \Delta t) \cdot f1_{t-\Delta t} + \frac{1}{2} \Delta t \cdot (f_{t-\Delta t} + f_t)$$

$$f2_t = \lambda \Delta t \cdot f1_{t-\Delta t} + (1 - \lambda \Delta t) \cdot f2_{t-n\Delta t}$$

$$f_{\text{convolved_squared},t} = k \cdot (f1_t - f2_t)^2,$$

641 where  $\Delta t = 0.05$  s,  $\lambda = \frac{1}{\tau}$ ,  $\tau = 0.25$  s, and  $n = 5$  s.  $k$  values were empirically chosen for each feature.

#### 642 Behaviour classifiers

643 Behaviour classifiers were developed using a user interface similar to JAABA (**Kabra et al., 2013**).  
644 The underlying algorithms combined trained neural networks and empirically determined linear  
645 thresholds. We developed a MATLAB (MathWorks, Natick, Massachusetts) user interface with func-  
646 tions for data visualisation, manual annotation, and machine learning using the Neural Network  
647 Toolbox, the Deep Learning Toolbox, and the Statistics and Machine Learning Toolbox. Here we  
648 briefly describe the behaviour classifiers and provide performance results based on manual vali-  
649 dation (**Table 1**).

650 The `bend` classifier was based on predefined thresholds for temporally smoothed body shape  
651 features and was itself exponentially smoothed over time. Independent `left` and `right` classifiers  
652 were used to initially detect bend direction. To detect left and right bends, these classifiers were  
653 combined with the smoothed `bend` classifier using an AND conjunction. The raw time series of left  
654 and right bends was further smoothed post-acquisition using a custom MATLAB script: two bends  
655 to the same side separated by less than 200 ms were combined into a single long bend, and short  
656 bends of less than 200 ms were removed from analysis.

657 To improve `left` and `right` detection performance, we developed a classifier for circular larval  
658 contours. This `ball` classifier used a feed-forward neural network with a single fully connected  
659 hidden layer whose inputs were normalised values of `eig_reduced`, `larva_arc_ratio`, and `larva_`  
660 `area_ratio`. The hidden layer consisted of five neurons with a hyperbolic tangent activation func-  
661 tion. The output layer contained a single neuron and used a sigmoid activation function. The  
662 neural network was trained in MATLAB on a manually annotated data set for 500 epochs using a  
663 cross-entropy loss function and scaled conjugate gradient backpropagation. If a `ball` was detected  
664 within the previous 1.5 s, `left` and `right` classifiers were overwritten to match the last detected  
665 bend direction prior to the beginning of the `ball`.

666 The `back` classifier detected individual backward peristaltic waves based on thresholds for smoothed  
667 tail velocity features combined with no `ball` detection within the previous 1.5 s.

668 Two different classifiers were used to detect crawling. `forward` detected longer forward crawl  
669 periods based on thresholds for smoothed tail velocity features combined with no `ball` detection

**Table 1.** Manual quantification of behaviour detection performance.

|                                                                              |       |
|------------------------------------------------------------------------------|-------|
| back (268 events from 24 larvae in 60 minutes of video data)                 |       |
| Precision                                                                    | 86.5% |
| Recall                                                                       | 88.4% |
| bend (714 events from 24 larvae in 60 minutes of video data)                 |       |
| Precision                                                                    | 95.6% |
| Recall                                                                       | 96.4% |
| Accuracy of left and right detection (true-positive bends)                   | 97.3% |
| forward (425 events from 24 larvae in 60 minutes of video data)              |       |
| Precision                                                                    | 97.8% |
| Recall                                                                       | 94.1% |
| forward_peristaltic (2954 events from 24 larvae in 60 minutes of video data) |       |
| Precision                                                                    | 99.5% |
| Recall                                                                       | 93.6% |
| Events which are falsely combined with another event                         | 10.7% |
| Events which are detected as more than one event                             | 1.2%  |
| roll (240 events from 24 larvae in 60 minutes of video data)                 |       |
| Precision (rolls and roll-like events)                                       | 96.6% |
| Recall (rolls)                                                               | 86.7% |
| Recall (roll-like events)                                                    | 25.8% |

670 within the previous 1.5 s. `forward_peristaltic` detected individual forward peristaltic waves based  
671 on the `forward` classifier and a threshold on forward tail velocity.

672 The `roll` classifier was based on thresholds for body shape and velocity combined with no ball  
673 detection and was exponentially smoothed over time. If a `roll` was detected within the previous  
674 1.5 s, `forward`, `forward_peristaltic`, and `back` classifier values were reset to reduce false-positive  
675 detection for these classifiers. Unusual behaviour patterns such as rapid bending or twitching  
676 could be observed in addition to true larval rolling. These behaviours were considered "roll-like"  
677 events during manual validation of the `roll` classifier's performance.

#### 678 Optogenetic stimulation

679 Optogenetic stimulation was achieved using two digital micromirror devices DMDs to project light  
680 patterns onto larvae on the agarose plate. During the hardware design process, two different DMD  
681 models were tested. One contained an integrated 613 nm LED (#CEL-5500-LED, Digital Light Inno-  
682 vations, Austin, Texas) and the other (#CEL-5500-FIBER, Digital Light Innovations, Austin, Texas)  
683 received input from an external 625 nm LED (#BLS-GCS-0625-38-A0710, Mightex Systems, Ontario,  
684 Canada) controlled by a BioLED light source control module (#BLS-13000-1, Mightex Systems, On-  
685 tario, Canada) and fed through an optic fibre (#LLG-05-59-420-2000-1, Mightex Systems, Ontario,  
686 Canada). Both DMDs operated like a 768 x 1024 pixel monochrome red light projector with nu-  
687 merous rotatable micromirrors used to modulate the intensity of individual pixels. Although both  
688 achieved similar light intensities, each DMD on its own was insufficient for optogenetic stimulation  
689 of larvae. We installed both devices on the system such that their projections each covered the  
690 entire agarose plate. In this way, the summed light intensities of the two DMDs could be achieved  
691 at all locations. Accurately aiming light at crawling larvae required spatial calibration of each DMD.  
692 Calibration was performed by projecting square spots at fixed DMD pixel locations and linearly  
693 fitting the corresponding camera coordinates.



694 We determined that DMD illumination using the default light output was not uniform at plate  
695 level, which could have resulted in variable optogenetic stimulation depending on larval location.  
696 The maximum achievable light intensity at the plate's edge was approximately 40% of the peak  
697 value at its centre. We therefore normalised the pixel intensity of the DMD image to the highest  
698 intensity uniformly achievable at all plate locations. A look-up table containing the normalisation  
699 factor for each DMD pixel was then calculated using bi-linear interpolation with approximately  
700 100 light intensity values measured across the plate. To accommodate for possible differences in  
701 non-uniformity between the two DMDs, this intensity calibration was performed for both DMDs  
702 simultaneously following spatial calibration. When fully calibrated, the system could achieve a  
703 uniform light intensity of 285  $\mu\text{W}/\text{cm}^2$ .

704 A user-defined Behaviour Programme protocol operated on the behaviour detection output  
705 and sent 8-bit optogenetic stimulation instructions to the LabVIEW application. Because the Lab-  
706 VIEW application updated DMD projections at 20 Hz, the delay between behaviour detection and  
707 closed-loop optogenetic stimulation of individual larvae did not exceed 50 ms. Furthermore, if two  
708 or more larvae were close enough such that their corresponding stimulation areas overlapped, the  
709 light intensity in the overlapping region was set to the smallest of those values to avoid undesired  
710 stimulation.

### 711 Thermogenetic stimulation

712 Thermogenetic stimulation was achieved by heating up larvae with a custom IR laser set-up. A  
713 1490 nm laser diode beam (#2CM-101, SemiNex, Peabody, Massachusetts) was fed into a two-  
714 axis galvanometer system (#GVSM002, Thorlabs, Newton, New Jersey), both controlled by an ana-  
715 logue output device (#PCIe-6738, National Instruments, Austin, Texas). Two mirrors inside the  
716 galvanometer were rotated around orthogonal axes to target the beam spot to any user-defined  
717 location on the agarose plate. The beam spot measured approximately 5 mm in diameter, de-  
718 pending on the beam's angle of incidence to the plate. Mirror positions were controlled by two  
719 integrated motors that received voltage inputs. Each voltage pair clearly defined the laser beam's  
720 position.

721 Spatially calibrating the galvanometer was necessary to obtain a map between larval locations  
722 in world coordinates and the mirror motor input voltages. A visible aiming beam was scanned  
723 across the agarose plate using a fixed set of voltage pair inputs to the galvanometer. With the  
724 optical filter removed from the camera, the aiming beam's location in camera coordinates was au-  
725 tomatically extracted from the image using binary thresholding. Two voltage-to-camera look-up  
726 tables were generated through bi-linear interpolation of these measured coordinates. For accu-  
727 rately targeted thermogenetic stimulation, the location of the larval centroid was first converted  
728 to camera coordinates using the existing world-to-camera transform and was then mapped to a  
729 pair of galvanometer input voltages using the look-up tables.

730 Laser intensity calibration was also necessary to ensure that all larvae received the same stimu-  
731 lation regardless of their position on the agarose plate. A larva's location changed the laser beam's  
732 angle of incidence, causing the illuminated spot at plate level to take an elliptical shape with variable  
733 size. Although laser beam power was constant, the changing spot area generated inconsistencies  
734 in the amount of IR light covering each larva. Calibration was used to normalise the desired laser  
735 intensity to achieve constant power per unit area. A visible aiming beam was scanned across the  
736 plate and the camera image automatically measured the beam's spot size at various locations. Bi-  
737 linear interpolation was then used to generate a pixel-wise look-up table containing the necessary  
738 scaling factors for the laser power. At the location where the laser spot area was smallest, the  
739 maximum power was reduced to 67.3%. We also accounted for a nonlinear relationship between  
740 the laser source input voltage and the laser's total power output by generating a voltage-to-power  
741 map from manual measurements. With these transformations, the system could calculate the  
742 laser source input voltage necessary to produce uniform, 5.26 W stimulation at any location.

743 A user-defined Behaviour Programme protocol operated on the 20 Hz behaviour detection out-

744 put and sent thermogenetic stimulation instructions to the LabVIEW application which controlled  
745 the galvanometer and laser. Four centroid locations were specified on every frame, enabling a  
746 single galvanometer to cycle the laser beam between four individual larvae at 20 Hz. Within the  
747 available 50 ms time window, each larva was heated for 11 ms. Switching off the laser input for  
748 1.5 ms between larvae accounted for small time fluctuations surrounding each new galvanometer  
749 position update and helped avoid undesired stimulation of other plate areas (**Figure 2D**). If fewer  
750 than four objects were detected in a given frame, the remaining galvanometer target locations  
751 were set to the plate's centre and the corresponding laser intensity was set to zero. This temporal  
752 pattern of galvanometer position updates yielded no more than 100 ms delay between behaviour  
753 detection and closed-loop thermogenetic stimulation.

754 Three parameters influenced larval temperature increase following thermogenetic stimulation  
755 with the IR beam: i) the laser power, ii) the total duration of the stimulus, and iii) the order in which  
756 the galvanometer cycles between locations in its 80 Hz movement. Preliminary experiments sug-  
757 gested that these parameters could be adjusted to simultaneously stimulate eight or twelve larvae  
758 using a single galvanometer. This could potentially eliminate the need to install three additional  
759 laser sources to target all 16 larvae.

#### 760 **Software availability**

761 All software code is available upon request.

#### 762 **Fly strains and larval rearing**

763 We used the following fly strains: *58E02-Gal4* (Bloomington stock 41347), *69F06-Gal4* (Bloomington  
764 stock 39497), *72F11-Gal4* (Bloomington stock 39786), *attP2* (**Pfeiffer et al., 2008**), *Ddc-Gal4* (**Li et al.,**  
765 **2000**), *SS01989* (own stock), *TH-Gal4* (**Friggi-Grelin et al., 2003**), *Tph-Gal4* (**Park et al., 2006**), *Trh-Gal4*  
766 (**Alekseyenko et al., 2010**), *UAS-CsChrimson* (Bloomington stock 55134), *UAS-CsChrimson; tsh-LexA,*  
767 *LexAop-Gal80* (Dr Stefan Pulver, Dr Yoshinori Aso), *UAS-dTrpA1* (Dr Paul Garrity), *UAS-GFP* (**Nern et al.,**  
768 **2015**), and *w<sup>1118</sup>* (**Hazelrigg et al., 1984**).

769 Fly stocks were maintained in vials filled with standard cornmeal food (**Wirtz and Semey, 1982;**  
770 49.2 ml of molasses, 19.9 g of yeast, 82.2 g of cornmeal, 7.4 g of agarose, 9.8 ml of 20% Tegosept  
771 solution in 95% ethanol and 5.2 ml of propionic acid in 1 litre of water). For proof-of-principle  
772 and operant and classical learning experiments, eggs were collected overnight for approximately  
773 12–18 hours on standard cornmeal food plates with additional dry yeast to increase laying. These  
774 experiments were performed using foraging-stage third-instar larvae (72–96 hours after egg laying)  
775 reared at 25°C and 65% humidity (**Ohyama et al., 2013, 2015; Jovanic et al., 2016, 2019; Eschbach**  
776 **et al., 2020b**). Specifically for optogenetics experiments, larvae were raised in the dark and a 1:200  
777 retinal solution (diluting 1 g of powdered all-*trans*-retinal (#R240000, Toronto Research Chemicals,  
778 Ontario, Canada) in 35.2 ml of 95% ethanol) was added to the food unless indicated otherwise.  
779 For immunohistochemistry, eggs were collected during daytime for approximately four hours on  
780 standard cornmeal food plates with added yeast. Dissections were performed using wandering-  
781 stage third-instar larvae (118–122 hours after egg laying).

#### 782 **Immunohistochemistry and confocal imaging**

783 All dissections, immunohistochemical stainings, and confocal imaging were done using a proce-  
784 dure adapted from **Jenett et al. (2012)** and **Li et al. (2014)**. Larval CNSs were dissected in cold 1x  
785 phosphate buffer saline (PBS, Corning Cellgro, #21-040) and transferred to tubes filled with cold  
786 4% paraformaldehyde (Electron Microscopy Sciences, #15713-S) in 1x PBS. Tubes were incubated  
787 for one hour at room temperature. The tissue was then washed four times in 1x PBS with 1%  
788 Triton X-100 (#X100, Sigma Aldrich St. Louis, Missouri) (PBT) and incubated in 1:20 donkey serum  
789 (#017-000-121, Jackson Immuno Research, West Grove, Pennsylvania) in PBT for two hours at room  
790 temperature.

791 The tissue was then incubated in the primary antibody solution, first for four hours at room  
792 temperature and then for two nights at 4°C. This solution contained mouse anti-Neuroglial (1:50,  
793 #BP104 anti-Neuroglial, Developmental Studies Hybridoma Bank, Iowa City, Iowa), rabbit anti-  
794 green fluorescent protein (GFP) (1:500, #A11122, Life Technologies, Waltham, Massachusetts) and  
795 rat anti-N-Cadherin (1:50, #DN-Ex #8, Developmental Studies Hybridoma Bank, Iowa City, Iowa) in  
796 PBT. This solution was then removed and the tissue washed four times in PBT. The tissue was then  
797 incubated in the secondary antibody solution, first for four hours at room temperature and then  
798 for two nights at 4°C. This solution contained Alexa Fluor 568 donkey anti-mouse (1:500, #A10037,  
799 Invitrogen, Waltham, Massachusetts), FITC donkey anti-rabbit (1:500, #711-095-152, Jackson Im-  
800 muno Research West Grove, Pennsylvania) and Alexa Fluor 647 donkey anti-rat (1:500, #712-605-  
801 153, Jackson Immuno Research West Grove, Pennsylvania) in PBT. After removal of the secondary  
802 solution, the tissue was washed in PBT four times and mounted on a coverslip coated with poly-L-  
803 lysine (#P1524-25MG, Sigma Aldrich, St. Louis, Missouri).

804 The coverslip with the CNSs was dehydrated by moving it through a series of jars containing  
805 ethanol at increasing concentrations (30%, 50%, 75%, 95%, 100%, 100%, 100%) for ten minutes  
806 each. The tissue was then cleared by soaking the coverslip with xylene (#X5-500, Fisher Scientific,  
807 Waltham, Massachusetts) three times for five minutes each. Finally, the coverslips were mounted  
808 in dibutyl phthalate in xylene (DPX, #13512, Electron Microscopy Sciences, Hatfield, Pennsylvania)  
809 with the tissue facing down on a microscope slide with spacers. The DPX was allowed to dry for at  
810 least two nights prior to confocal imaging with an LSM 710 microscope (Zeiss).

811 Details on the confocal imaging settings are provided in the respective figure captions. Confocal  
812 images were analysed using Fiji (ImageJ). Neurons were counted by specifying regions of interest  
813 around the cell bodies using raw image stacks.

#### 814 **Verification of optogenetic and thermogenetic stimulation efficiency**

815 We assessed the multi-larva tracker's optogenetic and thermogenetic stimulation efficiency through  
816 open-loop experiments. The behavioural readout was rolling upon exposure to stimulation. All lar-  
817 val handling and experiments were performed in the dark to avoid unintended optogenetic stimu-  
818 lation. The one-minute experiment protocol began with a 15 s initialisation period in which larvae  
819 acclimated to the agarose plate and the *rol1* behaviour classifier stabilised. In three subsequent  
820 15 s stimulation cycles, larvae received 5 s of open-loop stimulation followed by 10 s without stim-  
821 ulation (**Figure 2B**, **Figure 2E**). Optogenetics were performed with the maximum available red light  
822 intensity of 285  $\mu\text{W}/\text{cm}^2$ . Thermogenetics were performed with 40% of the maximum available  
823 laser intensity.

824 We analysed both optogenetic and thermogenetic experiment data using identical assessment  
825 and exclusion criteria. For each larva, the criterion for a single *rol1* was detection of the behaviour  
826 for at least 300 ms during a given 15 s stimulation cycle. This threshold ensured true rolls were  
827 counted, as opposed to rapid larval bends characteristic of aversion to light.

#### 828 **High-throughput operant conditioning**

##### 829 Experiment procedures

830 We performed high-throughput operant conditioning using our multi-larva closed-loop tracker. All  
831 larval handling and experiments were performed in the dark to avoid unintended optogenetic  
832 stimulation. We used water to wash approximately 10–12 larvae out of their food. Using a brush,  
833 we immediately placed these larvae into the centre of the agarose plate in such a way that they were  
834 not touching each other. We placed the agarose plate inside the tracker on top of the backlight and  
835 then shut the tracker door. Larvae were given at least 30 s to accustom to their new environment  
836 before we started the experiment.

837 The experiment protocol began and ended with a one-minute test period without optogenetic  
838 stimulation. Between these test periods were four, three-minute training sessions during which  
839 larvae received red light stimulation of 285  $\mu\text{W}/\text{cm}^2$  for the entire duration of the detected bend.

840 Which side received stimulation was randomized across trials such that approximately 50% of lar-  
841 vae were trained to develop a right bend preference and 50% a left bend preference. No stimulus  
842 was triggered when the larva was bending right or when its body was straight. The test periods  
843 were each separated by three-minute periods without stimulation. After the first minute of this  
844 period, a brush was used to gently move all larvae back to the centre of the plate and larvae were  
845 given time to recover before the beginning of the next training session. This recentring addresses  
846 problems encountered when performing prolonged experiments with freely behaving larvae on a  
847 small agarose plate. The longer larvae are left undisturbed, the more likely they are to touch the  
848 plate's edge, causing tracking disruption and temporary loss of valid objects. This shrinks sample  
849 size and reduces training efficiency by decreasing the proportion of animals which are receiving  
850 the stimulus.

851 Control experiments were designed so that valid objects received optogenetic stimulation un-  
852 correlated with behaviour. These control experiments were split into 60 s time bins, during which  
853 each valid object was randomly assigned a stimulus train from this same time bin, pulled from a  
854 prior experiment where stimulation correlated with behaviour.

### 855 Data analysis

856 Data analysis was conducted using custom MATLAB software. To ensure high quality data, it was  
857 necessary to remove invalid objects from the data set prior to behavioural analysis. These included  
858 corrupted objects (e.g. scratches on the plate or residual food) that the software mistook for larvae.  
859 They also included larvae that lost their object identity and were consequently detected for only  
860 part of the experiment (e.g. after temporarily reaching the plate's edge or touching other larvae).  
861 After equally splitting each experiment into 60 s time bins, we retained objects for analysis that  
862 fulfilled strict criteria: i) the object must have been detected in every frame of the bin; ii) the object's  
863 initial detection must have occurred at least 20 s prior to the start of the bin; iii) at no point during  
864 the bin did the smoothed velocity of the larval centroid exceed 1.5 mm/s; and iv) the mean of the  
865 smoothed centroid velocity across the object's detection period in the bin was at least 0.5 mm/s.  
866 To quantify the accuracy of this method, we manually reviewed 350 videos of objects flagged as  
867 valid for a given 60 s bin. In this group, we observed no severely corrupted objects. In one case  
868 (0.3%), a larva briefly touched another larva. In another case (0.3%), head and tail of a larva were  
869 falsely detected the majority of the time, leading to flipped detection of left and right bends.

870 When analysing valid bin data for operant conditioning of bend direction preference, we counted,  
871 for each larva, the numbers of left and right bends initiated within the bin. This was defined as the  
872 bend rate towards the respective direction. The probability of the larva bending towards the side  
873 paired with the optogenetic stimulus was defined as the ratio of the number of bends towards this  
874 side to the total number of bends initiated in the bin. We pooled together all larval data within  
875 each bin because bends to the left and right were each paired with the optogenetic stimulus for  
876 approximately half of the larvae. Mean and standard error were calculated for bend rate to the  
877 stimulated side, bend rate to the unstimulated side, and probability of bending towards the stim-  
878 ulated side. For the control condition in which larvae received random stimulation during 50% of  
879 bends regardless of direction, we calculated mean and standard error for bend rates to the left  
880 and right and the probability for bending towards the left. Bend rates to either side were com-  
881 pared to each other using a two-sided Wilcoxon signed-rank test. The probability for bending to  
882 a given side was compared to chance level (0.5) using a two-sided Wilcoxon signed-rank test. The  
883 behaviour characteristics of experimental animals were compared to the control group using a  
884 two-sided Mann-Whitney *U* test.

### 885 Classical conditioning

#### 886 Experiment procedures

887 *CsChrimson* (Klapoetke *et al.*, 2014) was expressed under the control of driver lines targeting can-  
888 didate valence-conveying neurons. These driver lines were classified based on expression pattern

889 and previous functional data and are known to drive expression in larvae. Optogenetic activation  
890 of neurons (US) was paired with odour presentation (CS) to induce olfactory memory (**Figure 4A**).  
891 For each driver line, data was acquired from at least two separate crosses.

892 Classical conditioning followed a procedure similar to those described in *Gerber and Hendel*  
893 *(2006)*, *Saumweber et al. (2011)* and *Eschbach et al. (2020b)*. Approximately 40 third-instar larvae  
894 were transferred onto a 4% agarose petri dish. Larvae were presented with an odour (1:10<sup>4</sup> ethyl  
895 acetate in ddH<sub>2</sub>O) pipetted onto two pieces of filter paper attached to the lid of the dish. This en-  
896 closed dish was exposed to red light (630 nm, 350 μW/cm<sup>2</sup>) for three minutes. Larvae were then  
897 transferred to a new agarose-filled petri dish with no odour on its lid (“air”) and placed in the dark  
898 for three minutes. This training procedure was repeated three times, with alternating presentation  
899 of odour/light and air/dark (paired group). An unpaired group receiving reciprocal stimulus presen-  
900 tation (odour/dark, air/light) was trained simultaneously. This ensured that any observed effects  
901 were attributable to learning rather than innate odour preference or avoidance. The training trial  
902 order was reversed in half of the experiments, starting with air instead of odour presentation.

903 After training, larvae of both paired and unpaired groups were immediately transferred to a  
904 1 cm middle zone in the centre of fresh agarose-filled petri dishes. A lid was placed on each dish,  
905 with odour presented on one side (odour side) but not the other (air side). After a three-minute  
906 test period in the dark, the number of larvae on the odour side, the air side, and in the middle zone  
907 were manually counted and entered into an Excel spreadsheet (Microsoft Corporation, Remond,  
908 Washington).

#### 909 Data analysis

All data was manually entered into MATLAB and analysed using custom software. For each experi-  
ment, a performance index (PI) was calculated as follows:

$$\text{Pref}_{\text{paired}} = \frac{\#(\text{larvae on odour side}) - \#(\text{larvae on air side})}{\#(\text{larvae on plate})} \quad (\text{paired dish})$$

$$\text{Pref}_{\text{unpaired}} = \frac{\#(\text{larvae on odour side}) - \#(\text{larvae on air side})}{\#(\text{larvae on plate})} \quad (\text{unpaired dish})$$

$$\text{PI} = \frac{\text{Pref}_{\text{paired}} - \text{Pref}_{\text{unpaired}}}{2} \quad (\text{combined})$$

910 PIs take values between -1 and +1, where a positive PI reflects appetitive learning and a neg-  
911 ative PI reflects aversive learning. Mean and standard error were calculated for each condition.  
912 Statistical differences between two groups were tested using a two-sided Mann-Whitney *U* test  
913 with Bonferroni correction. Significance compared to zero was tested with a two-sided Wilcoxon  
914 signed-rank test with Bonferroni correction.

#### 915 Acknowledgments

916 We thank Dr. Chris McRaven for design and technical assistance with the thermogenetic laser light  
917 source; Howard Hughes Medical Institute (HHMI) Janelia FlyCore and FlyLight teams for assistance  
918 with fly crosses, fly food, and confocal imaging; Gates Cambridge Trust, Cambridge Trust, HHMI  
919 Janelia Visiting Scientist Program, University of Cambridge Trinity College, HHMI Janelia, European  
920 Research Council, Wellcome Trust, and Medical Research Council for funding.

#### 921 Competing interests

922 The authors declare that no competing interests exist.

#### 923 References

924 **Abramson CI**, Dinges CW, Wells H. Operant Conditioning in Honey Bees (*Apis mellifera* L.): The Cap Pushing  
925 Response. PLoS ONE. 2016; 11(9):e0162347. doi: [10.1371/journal.pone.0162347](https://doi.org/10.1371/journal.pone.0162347).



- 926 **Aceves-Piña EO**, Quinn WG. Learning in Normal and Mutant Drosophila Larvae. *Science*. 1979; 206(4414):93–  
927 96. doi: [10.1126/science.206.4414.93](https://doi.org/10.1126/science.206.4414.93).
- 928 **Alekseyenko OV**, Lee C, Kravitz EA. Targeted Manipulation of Serotonergic Neurotransmission Affects the Escalation of Aggression in Adult Male Drosophila melanogaster. *PLoS ONE*. 2010; 5(5):e10806. doi: [10.1371/journal.pone.0010806](https://doi.org/10.1371/journal.pone.0010806).
- 931 **Alexander J**, Audesirk TE, Audesirk GJ. One-trial reward learning in the snail *Lymnea stagnalis*. *Journal of Neurobiology*. 1984; 15(1):67–72. doi: [10.1002/neu.480150107](https://doi.org/10.1002/neu.480150107).
- 933 **Almeida-Carvalho MJ**, Berh D, Braun A, Chen YC, Eichler K, Eschbach C, Fritsch PMJ, Gerber B, Hoyer N, Jiang X, Kleber J, Klämbt C, König C, Louis M, Michels B, Miroshnikow A, Mirth C, Miura D, Niewalda T, Otto N, et al. The O1mpiad: concordance of behavioural faculties of stage 1 and stage 3 Drosophila larvae. *The Journal of Experimental Biology*. 2017; 220:2452–2475. doi: [10.1242/jeb.156646](https://doi.org/10.1242/jeb.156646).
- 937 **Andreatta M**, Pauli P. Appetitive vs. Aversive conditioning in humans. *Frontiers in Behavioral Neuroscience*. 2015; 9:128. doi: [10.3389/fnbeh.2015.00128](https://doi.org/10.3389/fnbeh.2015.00128).
- 939 **Apostolopoulou AA**, Mazija L, Wüst A, Thum AS. The neuronal and molecular basis of quinine-dependent bitter taste signaling in Drosophila larvae. *Frontiers in Behavioral Neuroscience*. 2014; 8:6. doi: [10.3389/fnbeh.2014.00006](https://doi.org/10.3389/fnbeh.2014.00006).
- 942 **Apostolopoulou AA**, Widmann A, Rohwedder A, Pfizenmaier JE, Thum AS. Appetitive Associative Olfactory Learning in Drosophila Larvae. *Journal of Visualized Experiments*. 2013; 72:e4334. doi: [10.3791/4334](https://doi.org/10.3791/4334).
- 944 **Aso Y**, Hattori D, Yu Y, Johnston RM, Iyer NA, Ngo TTB, Dionne H, Abbott LF, Axel R, Tanimoto H, Rubin GM. The neuronal architecture of the mushroom body provides a logic for associative learning. *eLife*. 2014; 3:e04577. doi: [10.7554/eLife.04577](https://doi.org/10.7554/eLife.04577).
- 947 **Aso Y**, Herb A, Ogueta M, Siwanowicz I, Templier T, Friedrich AB, Ito K, Scholz H, Tanimoto H. Three Dopamine pathways induce aversive odor memories with different stability. *PLoS Genetics*. 2012; 8(7):e1002768. doi: [10.1371/journal.pgen.1002768](https://doi.org/10.1371/journal.pgen.1002768).
- 950 **Aso Y**, Sitaraman D, Ichinose T, Kaun KR, Vogt K, Belliard-Guérin G, Plaçais PY, Robie AA, Yamagata N, Schnaitmann C, Rowell WJ, Johnston RM, Ngo TTB, Chen N, Korff W, Nitabach MN, Heberlein U, Preat T, Branson KM, Tanimoto H, et al. Mushroom body output neurons encode valence and guide memory-based action selection in Drosophila. *eLife*. 2014; 3:e04580. doi: [10.7554/eLife.04580](https://doi.org/10.7554/eLife.04580).
- 954 **Balleine BW**, Liljeholm M, Ostlund SB. The integrative function of the basal ganglia in instrumental conditioning. *Behavioural Brain Research*. 2009; 199:43–52. doi: [10.1016/j.bbr.2008.10.034](https://doi.org/10.1016/j.bbr.2008.10.034).
- 956 **Balleine BW**, Morris RW, Leung BK. Thalamocortical integration of instrumental learning and performance and their disintegration in addiction. *Brain Research*. 2015; 1628(Pt A):104–116. doi: [10.1016/j.brainres.2014.12.023](https://doi.org/10.1016/j.brainres.2014.12.023).
- 959 **Bath DE**, Stowers JR, Hörmann D, Poehlmann A, Dickson BJ, Straw AD. FlyMAD: rapid thermogenetic control of neuronal activity in freely walking Drosophila. *Nature Methods*. 2014; 11(7):756–762. doi: [10.1038/nmeth.2973](https://doi.org/10.1038/nmeth.2973).
- 962 **Berck ME**, Khandelwal A, Claus L, Hernandez-Nunez L, Si G, Tabone CJ, Li F, Truman JW, Fetter RD, Louis M, Samuel AD, Cardona A. The wiring diagram of a glomerular olfactory system. *eLife*. 2016; 5:e14859. doi: [10.7554/eLife.14859](https://doi.org/10.7554/eLife.14859).
- 965 **Berman GJ**, Choi DM, Bialek W, Shaevitz JW. Mapping the stereotyped behaviour of freely moving fruit flies. *Journal of The Royal Society Interface*. 2014; 11(99):20140672. doi: [10.1098/rsif.2014.0672](https://doi.org/10.1098/rsif.2014.0672).
- 967 **Booker R**, Quinn WG. Conditioning of leg position in normal and mutant Drosophila. *Proceedings of the National Academy of Sciences*. 1981; 78(6):3940–3944. doi: [10.1073/pnas.78.6.3940](https://doi.org/10.1073/pnas.78.6.3940).
- 969 **Brand AH**, Perrimon N. Targeted gene expression as a means of altering cell fates and generating dominant phenotypes. *Development (Cambridge, England)*. 1993; 118(2):401–15.
- 971 **Branson K**, Robie AA, Bender J, Perona P, Dickinson MH. High-throughput ethomics in large groups of Drosophila. *Nature Methods*. 2009; 6(6):451–457. doi: [10.1038/nmeth.1328](https://doi.org/10.1038/nmeth.1328).
- 973 **Braubach OR**, Wood HD, Gadbois S, Fine A, Croll RP. Olfactory conditioning in the zebrafish (*Danio rerio*). *Behavioural Brain Research*. 2009; 198(1):190–198. doi: [10.1016/j.bbr.2008.10.044](https://doi.org/10.1016/j.bbr.2008.10.044).

- 975 **Brembs B.** Operant conditioning in invertebrates. *Current Opinion in Neurobiology*. 2003; 13(6):710–717. doi:  
976 [10.1016/j.conb.2003.10.002](https://doi.org/10.1016/j.conb.2003.10.002).
- 977 **Brembs B.** Spontaneous decisions and operant conditioning in fruit flies. *Behavioural Processes*. 2011;  
978 87(1):157–164. doi: [10.1016/j.beproc.2011.02.005](https://doi.org/10.1016/j.beproc.2011.02.005).
- 979 **Brembs B, Lorenzetti FD, Reyes FD, Baxter DA, Byrne JH.** Operant Reward Learning in *Aplysia*: Neuronal Corre-  
980 lates and Mechanisms. *Science*. 2002; 296(5573):1706–1709. doi: [10.1126/science.1069434](https://doi.org/10.1126/science.1069434).
- 981 **Brembs B, Plendl W.** Double Dissociation of PKC and AC Manipulations on Operant and Classical Learning in  
982 *Drosophila*. *Current Biology*. 2008; 18(15):1168–1171. doi: [10.1016/j.cub.2008.07.041](https://doi.org/10.1016/j.cub.2008.07.041).
- 983 **Brown JS, Kalish HI, Farber IE.** Conditioned fear as revealed by magnitude of startle response to an auditory  
984 stimulus. *Journal of Experimental Psychology*. 1951; 41(5):317–328. doi: [10.1037/h0060166](https://doi.org/10.1037/h0060166).
- 985 **Campbell RAA, Honegger KS, Qin H, Li W, Demir E, Turner GC.** Imaging a Population Code for Odor  
986 Identity in the *Drosophila* Mushroom Body. *Journal of Neuroscience*. 2013; 33(25):10568–10581. doi:  
987 [10.1523/JNEUROSCI.0682-12.2013](https://doi.org/10.1523/JNEUROSCI.0682-12.2013).
- 988 **Caroni P.** Inhibitory microcircuit modules in hippocampal learning. *Current Opinion in Neurobiology*. 2015;  
989 35:66–73. doi: [10.1016/j.conb.2015.06.010](https://doi.org/10.1016/j.conb.2015.06.010).
- 990 **Carreira-Rosario A, Zarin AA, Clark MQ, Manning L, Fetter RD, Cardona A, Doe CQ.** MDN brain descend-  
991 ing neurons coordinately activate backward and inhibit forward locomotion. *eLife*. 2018; 7:e38554. doi:  
992 [10.7554/eLife.38554](https://doi.org/10.7554/eLife.38554).
- 993 **Chen YJ, Li YC, Huang KN, Young MS.** The Implementation of a Stand-alone Video Tracking and Analysis System  
994 for Animal Behavior Measurement in Morris Water Maze. In: *IEEE Engineering in Medicine and Biology 27th*  
995 *Annual Conference IEEE*; 2005. p. 1766–1768. doi: [10.1109/iembs.2005.1616788](https://doi.org/10.1109/iembs.2005.1616788).
- 996 **Chiuchisan I.** A new FPGA-based real-time configurable system for medical image processing. In: *E-Health and*  
997 *Bioengineering Conference (EHB) IEEE*; 2013. p. 1–4. doi: [10.1109/EHB.2013.6707301](https://doi.org/10.1109/EHB.2013.6707301).
- 998 **Claridge-Chang A, Roorda RD, Vrontou E, Sjulson L, Li H, Hirsh J, Miesenböck G.** Writing Memories with Light-  
999 Addressable Reinforcement Circuitry. *Cell*. 2009; 139(2):405–415. doi: [10.1016/j.cell.2009.08.034](https://doi.org/10.1016/j.cell.2009.08.034).
- 1000 **Clyne JD, Miesenböck G.** Sex-Specific Control and Tuning of the Pattern Generator for Courtship Song in  
1001 *Drosophila*. *Cell*. 2008; 133(2):354–363. doi: [10.1016/j.cell.2008.01.050](https://doi.org/10.1016/j.cell.2008.01.050).
- 1002 **Cognigni P, Felsenberg J, Waddell S.** Do the right thing: neural network mechanisms of memory for-  
1003 mation, expression and update in *Drosophila*. *Current Opinion in Neurobiology*. 2018; 49:51–58. doi:  
1004 [10.1016/j.conb.2017.12.002](https://doi.org/10.1016/j.conb.2017.12.002).
- 1005 **Colomb J, Brembs B.** The biology of psychology. *Communicative & Integrative Biology*. 2010; 3(2):142–145. doi:  
1006 [10.4161/cib.3.2.10334](https://doi.org/10.4161/cib.3.2.10334).
- 1007 **Colomb J, Brembs B.** PKC in motoneurons underlies selflearning, a form of motor learning in *Drosophila*.  
1008 *PeerJ*. 2016; 4:e1971. doi: [10.7717/peerj.1971](https://doi.org/10.7717/peerj.1971).
- 1009 **Cong L, Wang Z, Chai Y, Hang W, Shang C, Yang W, Bai L, Du J, Wang K, Wen Q.** Rapid whole brain imaging of neu-  
1010 ral activity in freely behaving larval zebrafish (*Danio rerio*). *eLife*. 2017; 6:e28158. doi: [10.7554/eLife.28158](https://doi.org/10.7554/eLife.28158).
- 1011 **Corbett D, Wise RA.** Intracranial self-stimulation in relation to the ascending dopaminergic systems of the  
1012 midbrain: A moveable electrode mapping study. *Brain Research*. 1980; 185(1):1–15. doi: [10.1016/0006-8993\(80\)90666-6](https://doi.org/10.1016/0006-8993(80)90666-6).
- 1014 **Curcio JA, Petty CC.** The near infrared absorption spectrum of liquid water. *Journal of the Optical Society of*  
1015 *America*. 1951; 41(5):302–304. doi: [10.1364/JOSA.41.000302](https://doi.org/10.1364/JOSA.41.000302).
- 1016 **van Dam EA, Noldus LPJJ, van Gerven MAJ.** Deep learning improves automated rodent behavior recog-  
1017 nition within a specific experimental setup. *Journal of Neuroscience Methods*. 2020; 332:108536. doi:  
1018 [10.1016/j.jneumeth.2019.108536](https://doi.org/10.1016/j.jneumeth.2019.108536).
- 1019 **Dankert H, Wang L, Hoopfer ED, Anderson DJ, Perona P.** Automated monitoring and analysis of social behavior  
1020 in *Drosophila*. *Nature Methods*. 2009; 6(4):297–303. doi: [10.1038/nmeth.1310](https://doi.org/10.1038/nmeth.1310).
- 1021 **DasGupta S, Ferreira CH, Miesenböck G.** FoxP influences the speed and accuracy of a perceptual decision in  
1022 *Drosophila*. *Science*. 2014; 344(6186):901–904. doi: [10.1126/science.1252114](https://doi.org/10.1126/science.1252114).

- 1023 **Davis RL.** Olfactory Memory Formation in *Drosophila*: From Molecular to Systems Neuroscience. Annual  
1024 Review of Neuroscience. 2005; 28:275–302. doi: [10.1146/annurev.neuro.28.061604.135651](https://doi.org/10.1146/annurev.neuro.28.061604.135651).
- 1025 **Denisov G,** Ohyama T, Jovanic T, Zlatic M. Model-based Detection and Analysis of Animal Behaviors using  
1026 Signals Extracted by Automated Tracking. In: *BIO SIGNALS*; 2013. p. 175–181. doi: [10.13140/2.1.5191.6168](https://doi.org/10.13140/2.1.5191.6168).
- 1027 **Dickinson A.** Conditioning and Associative Learning. British Medical Bulletin. 1981; 37(2):165–168. doi:  
1028 [10.1093/oxfordjournals.bmb.a071695](https://doi.org/10.1093/oxfordjournals.bmb.a071695).
- 1029 **Donelson N,** Kim EZ, Slawson JB, Vecsey CG, Huber R, Griffith LC. High-Resolution Positional Tracking for  
1030 Long-Term Analysis of *Drosophila* Sleep and Locomotion Using the “Tracker” Program. PLoS ONE. 2012;  
1031 7(5):e37250. doi: [10.1371/journal.pone.0037250](https://doi.org/10.1371/journal.pone.0037250).
- 1032 **Dong Y,** Green T, Saal D, Marie H, Neve R, Nestler EJ, Malenka RC. CREB modulates excitability of nucleus  
1033 accumbens neurons. Nature Neuroscience. 2006; 9(4):475–477. doi: [10.1038/nn1661](https://doi.org/10.1038/nn1661).
- 1034 **Eichler K,** Li F, Litwin-Kumar A, Park Y, Andrade I, Schneider-Mizell CM, Saumweber T, Huser A, Eschbach C, Ger-  
1035 ber B, Fetter RD, Truman JW, Priebe CE, Abbott LF, Thum AS, Zlatic M, Cardona A. The complete connectome  
1036 of a learning and memory centre in an insect brain. Nature. 2017; 548(7666):175–182. doi: [10.1038/nature23455](https://doi.org/10.1038/nature23455).
- 1038 **Eschbach C,** Cano C, Haberkern H, Schraut K, Guan C, Triphan T, Gerber B. Associative learning between  
1039 odorants and mechanosensory punishment in larval *Drosophila*. Journal of Experimental Biology. 2011;  
1040 214(Pt 23):3897–3905. doi: [10.1242/jeb.060533](https://doi.org/10.1242/jeb.060533).
- 1041 **Eschbach C,** Fushiki A, Winding M, Afonso B, Andrade IV, Cocanougher BT, Eichler K, Gepner R, Si G, Valdes-  
1042 Aleman J, Gershow M, Sxe Jefferis G, Truman JW, Fetter RD, Samuel A, Cardona A, Zlatic M. Circuits for  
1043 integrating learnt and innate valences in the fly brain. bioRxiv. 2020; doi: [10.1101/2020.04.23.058339](https://doi.org/10.1101/2020.04.23.058339).
- 1044 **Eschbach C,** Fushiki A, Winding M, Schneider-Mizell CM, Shao M, Arruda R, Eichler K, Valdes-Aleman J, Ohyama  
1045 T, Thum AS, Gerber B, Fetter RD, Truman JW, Litwin-Kumar A, Cardona A, Zlatic M. Recurrent architecture  
1046 for adaptive regulation of learning in the insect brain. Nature Neuroscience. 2020; 23(4):544–555. doi:  
1047 [10.1038/s41593-020-0607-9](https://doi.org/10.1038/s41593-020-0607-9).
- 1048 **von Essen AMHJ,** Pauls D, Thum AS, Sprecher SG. Capacity of Visual Classical Conditioning in *Drosophila* Larvae.  
1049 Behavioral Neuroscience. 2011; 125(6):921–929. doi: [10.1037/a0025758](https://doi.org/10.1037/a0025758).
- 1050 **Everitt BJ,** Giuliano C, Belin D. Addictive behaviour in experimental animals: prospects for translation. Philo-  
1051 sopherical Transactions of the Royal Society B. 2018; 373(1742):20170027. doi: [10.1098/rstb.2017.0027](https://doi.org/10.1098/rstb.2017.0027).
- 1052 **Fee MS,** Goldberg JH. A hypothesis for basal ganglia-dependent reinforcement learning in the songbird. Neu-  
1053 roscience. 2011; 198:152–170. doi: [10.1016/j.neuroscience.2011.09.069](https://doi.org/10.1016/j.neuroscience.2011.09.069).
- 1054 **Fee MS.** The role of efference copy in striatal learning. Current Opinion in Neurobiology. 2014; 25:194–200.  
1055 doi: [10.1016/j.conb.2014.01.012](https://doi.org/10.1016/j.conb.2014.01.012).
- 1056 **Fischer JA,** Giniger E, Maniatis T, Ptashne M. GAL4 activates transcription in *Drosophila*. Nature. 1988;  
1057 332(6167):853–856. doi: [10.1038/332853a0](https://doi.org/10.1038/332853a0).
- 1058 **Friggi-Grelín F,** Coulom H, Meller M, Gomez D, Hirsh J, Birman S. Targeted gene expression in *Drosophila*  
1059 dopaminergic cells using regulatory sequences from tyrosine hydroxylase. Journal of Neurobiology. 2003;  
1060 54(4):618–627. doi: [10.1002/neu.10185](https://doi.org/10.1002/neu.10185).
- 1061 **Fry SN,** Rohrseitz N, Straw AD, Dickinson MH. TrackFly: Virtual reality for a behavioral system  
1062 analysis in free-flying fruit flies. Journal of Neuroscience Methods. 2008; 171(1):110–117. doi:  
1063 [10.1016/j.jneumeth.2008.02.016](https://doi.org/10.1016/j.jneumeth.2008.02.016).
- 1064 **Fushiki A,** Zwart MF, Kohsaka H, Fetter RD, Cardona A, Nose A. A circuit mechanism for the propagation of  
1065 waves of muscle contraction in *Drosophila*. eLife. 2016; 5:e13253. doi: [10.7554/eLife.13253](https://doi.org/10.7554/eLife.13253).
- 1066 **Ganguly A,** Qi C, Bajaj J, Lee D. Serotonin receptor 5-HT7 in *Drosophila* mushroom body neurons mediates  
1067 larval appetitive olfactory learning. Scientific Reports. 2020; 10(1):21267. doi: [10.1038/s41598-020-77910-5](https://doi.org/10.1038/s41598-020-77910-5).
- 1068 **Gerber B,** Scherer S, Neuser K, Michels B, Hendel T, Stocker RF, Heisenberg M. Visual learning in indi-  
1069 vidually assayed *Drosophila* larvae. The Journal of Experimental Biology. 2004; 207(Pt 1):179–188. doi:  
1070 [10.1242/jeb.00718](https://doi.org/10.1242/jeb.00718).

- 1071 **Gerber B**, Hendel T. Outcome expectations drive learned behaviour in larval *Drosophila*. *Proceedings of the*  
1072 *Royal Society B*. 2006; 273(1604):2965–2968. doi: [10.1098/rspb.2006.3673](https://doi.org/10.1098/rspb.2006.3673).
- 1073 **Gershow M**, Berck M, Mathew D, Luo L, Kane EA, Carlson JR, Samuel ADT. Controlling airborne cues to study  
1074 small animal navigation. *Nature Methods*. 2012; 9(3):290–296. doi: [10.1038/nmeth.1853](https://doi.org/10.1038/nmeth.1853).
- 1075 **Giurfa M**. Associative Learning: The Instructive Function of Biogenic Amines. *Current Biology*. 2006;  
1076 16(20):R892–R895. doi: [10.1016/j.cub.2006.09.021](https://doi.org/10.1016/j.cub.2006.09.021).
- 1077 **Gomez-Marin A**, Stephens GJ, Louis M. Active sampling and decision making in *Drosophila* chemotaxis. *Nature*  
1078 *Communications*. 2011; 2:441. doi: [10.1038/ncomms1455](https://doi.org/10.1038/ncomms1455).
- 1079 **Gómez-Pinilla F**, Huie JR, Ying Z, Ferguson AR, Crown ED, Baumbauer KM, Edgerton VR, Grau JW. BDNF and  
1080 learning: Evidence that instrumental training promotes learning within the spinal cord by up-regulating BDNF  
1081 expression. *Neuroscience*. 2007; 148(4):893–906. doi: [10.1016/j.neuroscience.2007.05.051](https://doi.org/10.1016/j.neuroscience.2007.05.051).
- 1082 **Gonzalez RC**, Woods RE. Digital image processing, Ebook. Fourth, gl ed. Pearson Education, Limited; 2018.
- 1083 **Grau JW**, Barstow DG, Joynes RL. Instrumental learning within the spinal cord: I. Behavioral properties. *Behav-*  
1084 *ioral Neuroscience*. 1998; 112(6):1366–1386. doi: [10.1037/0735-7044.112.6.1366](https://doi.org/10.1037/0735-7044.112.6.1366).
- 1085 **Graving JM**, Couzin ID. VAE-SNE: a deep generative model for simultaneous dimensionality reduction and  
1086 clustering. *bioRxiv*. 2020; doi: [10.1101/2020.07.17.207993](https://doi.org/10.1101/2020.07.17.207993).
- 1087 **Groszer M**, Keays DA, Deacon RMJ, de Bono JP, Prasad-Mulcare S, Gaub S, Baum MG, French CA, Nicod J, Coventry  
1088 JA, Enard W, Fray M, Brown SDM, Nolan PM, Pääbo S, Channon KM, Costa RM, Eilers J, Ehret G, Rawlins JNP,  
1089 et al. Impaired Synaptic Plasticity and Motor Learning in Mice with a Point Mutation Implicated in Human  
1090 Speech Deficits. *Current Biology*. 2008; 18(5):354–362. doi: [10.1016/j.cub.2008.01.060](https://doi.org/10.1016/j.cub.2008.01.060).
- 1091 **Grover D**, Tower J, Tavaré S. O fly, where art thou? *Journal of the Royal Society Interface*. 2008; 5(27):1181–1191.  
1092 doi: [10.1098/rsif.2007.1333](https://doi.org/10.1098/rsif.2007.1333).
- 1093 **Gründemann J**, Lüthi A. Ensemble coding in amygdala circuits for associative learning. *Current Opinion in*  
1094 *Neurobiology*. 2015; 35:200–206. doi: [10.1016/j.conb.2015.10.005](https://doi.org/10.1016/j.conb.2015.10.005).
- 1095 **Gupta S**, Gomez-Marin A. A context-free grammar for *Caenorhabditis elegans* behavior. *bioRxiv*. 2019; <https://www.biorxiv.org/content/10.1101/708891v1>.
- 1097 **Haberkern H**, Basnak MA, Ahanonu B, Schauder D, Cohen JD, Bolstad M, Bruns C, Jayaraman V. Visually Guided  
1098 Behavior and Optogenetically Induced Learning in Head-Fixed Flies Exploring a Virtual Landscape. *Current*  
1099 *Biology*. 2019; 29(10):1647–1659.e8. doi: [10.1016/j.cub.2019.04.033](https://doi.org/10.1016/j.cub.2019.04.033).
- 1100 **Haesler S**, Rochefort C, Georgi B, Licznarski P, Osten P, Scharff C. Incomplete and inaccurate vocal imitation  
1101 after knockdown of FoxP2 in songbird basal ganglia nucleus Area X. *PLoS Biology*. 2007; 5(12):e321. doi:  
1102 [10.1371/journal.pbio.0050321](https://doi.org/10.1371/journal.pbio.0050321).
- 1103 **Hamada FN**, Rosenzweig M, Kang K, Pulver SR, Ghezzi A, Jegla TJ, Garrity PA. An internal thermal sensor control-  
1104 ling temperature preference in *Drosophila*. *Nature*. 2008; 454(7201):217–220. doi: [10.1038/nature07001](https://doi.org/10.1038/nature07001).
- 1105 **Hawkins RD**, Byrne JH. Associative Learning in Invertebrates. *Cold Spring Harbor Perspectives in Biology*. 2015;  
1106 7(5):a021709. doi: [10.1101/cshperspect.a021709](https://doi.org/10.1101/cshperspect.a021709).
- 1107 **Hazelrigg T**, Levis R, Rubin GM. Transformation of white locus DNA in *Drosophila*: Dosage compensation, zeste  
1108 interaction, and position effects. *Cell*. 1984; 36(2):469–481. doi: [10.1016/0092-8674\(84\)90240-X](https://doi.org/10.1016/0092-8674(84)90240-X).
- 1109 **Heckscher ES**, Lockery SR, Doe CQ. Characterization of *Drosophila* Larval Crawling at the Level of Organism,  
1110 Segment, and Somatic Body Wall Musculature. *Journal of Neuroscience*. 2012; 32(36):12460–12471. doi:  
1111 [10.1523/JNEUROSCI.0222-12.2012](https://doi.org/10.1523/JNEUROSCI.0222-12.2012).
- 1112 **Heisenberg M**. Mushroom body memoir: from maps to models. *Nature Reviews Neuroscience*. 2003; 4(4):266–  
1113 75. doi: [10.1038/nrn1074](https://doi.org/10.1038/nrn1074).
- 1114 **Heisenberg M**, Borst A, Wagner S, Byers D. *Drosophila* Mushroom Body Mutants are Deficient in Olfactory  
1115 Learning. *Journal of Neurogenetics*. 1985; 2(1):1–30. doi: [10.3109/01677068509100140](https://doi.org/10.3109/01677068509100140).

- 1116 **Hendel T**, Michels B, Neuser K, Schipanski A, Kaun K, Sokolowski MB, Marohn F, Michel R, Heisenberg M, Gerber  
1117 B. The carrot, not the stick: Appetitive rather than aversive gustatory stimuli support associative olfactory  
1118 learning in individually assayed *Drosophila* larvae. *Journal of Comparative Physiology A*. 2005; 191(3):265–  
1119 279. doi: 10.1007/s00359-004-0574-8.
- 1120 **Honegger KS**, Campbell RAA, Turner GC. Cellular-Resolution Population Imaging Reveals Robust Sparse  
1121 Coding in the *Drosophila* Mushroom Body. *Journal of Neuroscience*. 2011; 31(33):11772–11785. doi:  
1122 [10.1523/JNEUROSCI.1099-11.2011](https://doi.org/10.1523/JNEUROSCI.1099-11.2011).
- 1123 **Honjo K**, Furukubo-Tokunaga K. Induction of cAMP Response Element-Binding Protein-Dependent Medium-  
1124 Term Memory by Appetitive Gustatory Reinforcement in *Drosophila* Larvae. *Journal of Neuroscience*. 2005;  
1125 25(35):7905–7913. doi: [10.1523/jneurosci.2135-05.2005](https://doi.org/10.1523/jneurosci.2135-05.2005).
- 1126 **Honjo K**, Furukubo-Tokunaga K. Distinctive Neuronal Networks and Biochemical Pathways for Appetitive  
1127 and Aversive Memory in *Drosophila* Larvae. *Journal of Neuroscience*. 2009; 29(3):852–862. doi:  
1128 [10.1523/JNEUROSCI.1315-08.2009](https://doi.org/10.1523/JNEUROSCI.1315-08.2009).
- 1129 **Horridge GA**. Learning of leg position by the ventral nerve cord in headless insects. *Proceedings of the Royal*  
1130 *Society of London Series B Biological Sciences*. 1962; 157(966):33–52. doi: [10.1098/rspb.1962.0061](https://doi.org/10.1098/rspb.1962.0061).
- 1131 **Hoyle G**. Mechanisms of simple motor learning. *Trends in Neurosciences*. 1979; 2:153–155. doi: 10.1016/0166-  
1132 2236(79)90060-2.
- 1133 **Huang KM**, Cosman P, Schafer WR. Machine vision based detection of omega bends and reversals in *C. elegans*.  
1134 *Journal of Neuroscience Methods*. 2006; 158(2):323–336. doi: [10.1016/j.jneumeth.2006.06.007](https://doi.org/10.1016/j.jneumeth.2006.06.007).
- 1135 **Huser A**, Eschment M, Güllü N, Collins KAN, Böpplé K, Pankevych L, Rolsing E, Thum AS. Anatomy and behavioral  
1136 function of serotonin receptors in *Drosophila melanogaster* larvae. *PLoS ONE*. 2017; 12(8):e0181865. doi:  
1137 [10.1371/journal.pone.0181865](https://doi.org/10.1371/journal.pone.0181865).
- 1138 **Huser A**, Rohwedder A, Apostolopoulou AA, Widmann A, Pfitzenmaier JE, Maiolo EM, Selcho M, Pauls D, von  
1139 Essen A, Gupta T, Sprecher SG, Birman S, Riemensperger T, Stocker RF, Thum AS. The Serotonergic Central  
1140 Nervous System of the *Drosophila* Larva: Anatomy and Behavioral Function. *PLoS ONE*. 2012; 7(10):e47518.  
1141 doi: [10.1371/journal.pone.0047518](https://doi.org/10.1371/journal.pone.0047518).
- 1142 **Hwang RY**, Zhong L, Xu Y, Johnson T, Zhang F, Deisseroth K, Tracey WD. Nociceptive Neurons Protect *Drosophila*  
1143 Larvae from Parasitoid Wasps. *Current Biology*. 2007; 17(24):2105–2116. doi: [10.1016/j.cub.2007.11.029](https://doi.org/10.1016/j.cub.2007.11.029).
- 1144 **Jefferis GSXE**, Potter CJ, Chan AM, Marin EC, Rohlfsing T, Maurer, Jr CR, Luo L. Comprehensive Maps of  
1145 *Drosophila* Higher Olfactory Centers: Spatially Segregated Fruit and Pheromone Representation. *Cell*. 2007;  
1146 128(6):1187–1203. doi: [10.1016/j.cell.2007.01.040](https://doi.org/10.1016/j.cell.2007.01.040).
- 1147 **Jenett A**, Rubin GM, Ngo TTB, Shepherd D, Murphy C, Dionne H, Pfeiffer BD, Cavallaro A, Hall D, Jeter J, Iyer N,  
1148 Fetter D, Hausenfluck JH, Peng H, Trautman ET, Svirskas RR, Myers EW, Iwinski ZR, Aso Y, DePasquale GM,  
1149 et al. A GAL4-Driver Line Resource for *Drosophila* Neurobiology. *Cell Reports*. 2012; 2(4):991–1001. doi:  
1150 [10.1016/j.celrep.2012.09.011](https://doi.org/10.1016/j.celrep.2012.09.011).
- 1151 **Jin X**, Costa RM. Start/stop signals emerge in nigrostriatal circuits during sequence learning. *Nature*. 2010;  
1152 466(7305):457–462. doi: 10.1038/nature09263.
- 1153 **Joel D**. The signal attenuation rat model of obsessive-compulsive disorder: a review. *Psychopharmacology*.  
1154 2006; 186(4):487–503. doi: 10.1007/s00213-006-0387-2.
- 1155 **Johnson O**, Becnel J, Nichols CD. Serotonin receptor activity is necessary for olfactory learning and memory in  
1156 *Drosophila melanogaster*. *Neuroscience*. 2011; 192:372–381. doi: [10.1016/j.neuroscience.2011.06.058](https://doi.org/10.1016/j.neuroscience.2011.06.058).
- 1157 **Jones SV**, Heldt SA, Davis M, Ressler KJ. Olfactory-Mediated Fear Conditioning in Mice: Simultaneous Mea-  
1158 surements of Fear-Potentiated Startle and Freezing. *Behavioral Neuroscience*. 2005; 119(1):329–335. doi:  
1159 [10.1037/0735-7044.119.1.329](https://doi.org/10.1037/0735-7044.119.1.329).
- 1160 **Jovanic T**, Schneider-Mizell CM, Shao M, Masson JB, Denisov G, Fetter RD, Mensh BD, Truman JW, Cardona A,  
1161 Zlatić M. Competitive Disinhibition Mediates Behavioral Choice and Sequences in *Drosophila*. *Cell*. 2016;  
1162 167(3):858–870.e19. doi: [10.1016/j.cell.2016.09.009](https://doi.org/10.1016/j.cell.2016.09.009).
- 1163 **Jovanic T**, Winding M, Cardona A, Truman JW, Gershow M, Zlatić M, Jovanic T, Winding M, Cardona A, Truman  
1164 JW, Gershow M. Neural Substrates of *Drosophila* Larval Anemotaxis Article Neural Substrates of *Drosophila*  
1165 Larval Anemotaxis. *Current Biology*. 2019; 29(4):554–566. doi: [10.1016/j.cub.2019.01.009](https://doi.org/10.1016/j.cub.2019.01.009).



- 1166 **Joynes RL**, Janjua K, Grau JW. Instrumental learning within the spinal cord: VI: The NMDA receptor antagonist,  
1167 AP5, disrupts the acquisition and maintenance of an acquired flexion response. *Behavioural Brain Research*.  
1168 2004; 154(2):431–438. doi: [10.1016/j.bbr.2004.03.030](https://doi.org/10.1016/j.bbr.2004.03.030).
- 1169 **Kabra M**, Robie AA, Rivera-Alba M, Branson S, Branson K. JAABA: interactive machine learning for automatic  
1170 annotation of animal behavior. *Nature Methods*. 2013; 10(1):64–67. doi: [10.1038/nmeth.2281](https://doi.org/10.1038/nmeth.2281).
- 1171 **Kane EA**, Gershow M, Afonso B, Larderet I, Klein M, Carter AR, de Bivort BL, Sprecher SG, Samuel ADT. Senso-  
1172 rimotor structure of *Drosophila* larva phototaxis. *Proceedings of the National Academy of Sciences*. 2013;  
1173 110(40):E3868–E3877. doi: [10.1073/pnas.1215295110](https://doi.org/10.1073/pnas.1215295110).
- 1174 **Karagoyzov D**, Mihovilovic Skanata M, Lesar A, Gershow M. Recording Neural Activity in Unrestrained Animals  
1175 with Three-Dimensional Tracking Two-Photon Microscopy. *Cell Reports*. 2018; 25(5):1371–1383.e10. doi:  
1176 [10.1016/j.celrep.2018.10.013](https://doi.org/10.1016/j.celrep.2018.10.013).
- 1177 **Katsov AY**, Clandinin TR. Motion Processing Streams in *Drosophila* Are Behaviorally Specialized. *Neuron*. 2008;  
1178 59(2):322–335. doi: [10.1016/j.neuron.2008.05.022](https://doi.org/10.1016/j.neuron.2008.05.022).
- 1179 **Keene AC**, Krashes MJ, Leung B, Bernard JA, Waddell S. *Drosophila* Dorsal Paired Medial Neurons Pro-  
1180 vide a General Mechanism for Memory Consolidation. *Current Biology*. 2006; 16(15):1524–1530. doi:  
1181 [10.1016/j.cub.2006.06.022](https://doi.org/10.1016/j.cub.2006.06.022).
- 1182 **Keene AC**, Stratmann M, Keller A, Perrat PN, Vosshall LB, Waddell S. Diverse odor-conditioned memo-  
1183 ries require uniquely timed dorsal paired medial neuron output. *Neuron*. 2004; 44(3):521–533. doi:  
1184 [10.1016/j.neuron.2004.10.006](https://doi.org/10.1016/j.neuron.2004.10.006).
- 1185 **Kernan M**, Cowan D, Zuker C. Genetic dissection of mechanosensory transduction: Mechanoreception-  
1186 defective mutations of *drosophila*. *Neuron*. 1994; 12(6):1195–1206. doi: [10.1016/0896-6273\(94\)90437-5](https://doi.org/10.1016/0896-6273(94)90437-5).
- 1187 **Khurana S**, Robinson BG, Wang Z, Shropshire WC, Zhong AC, Garcia LE, Corpuz J, Chow J, Hatch MM, Precise  
1188 EF, Cady A, Godinez RM, Pulpanyawong T, Nguyen AT, Li Wk, Seiter M, Jahanian K, Sun JC, Shah R, Rajani  
1189 S, et al. Olfactory Conditioning in the Third Instar Larvae of *Drosophila melanogaster* Using Heat Shock  
1190 Reinforcement. *Behavior Genetics*. 2012; 42(1):151–161. doi: [10.1007/s10519-011-9487-9](https://doi.org/10.1007/s10519-011-9487-9).
- 1191 **Kitamoto T**. Conditional modification of behavior in *Drosophila* by targeted expression of a temperature-  
1192 sensitive shibire allele in defined neurons. *Journal of Neurobiology*. 2001; 47(2):81–92. doi:  
1193 [10.1002/neu.1018](https://doi.org/10.1002/neu.1018).
- 1194 **Klapoetke NC**, Murata Y, Kim SS, Pulver SR, Birdsey-Benson A, Cho YK, Morimoto TK, Chuong AS, Carpenter  
1195 EJ, Tian Z, Wang J, Xie Y, Yan Z, Zhang Y, Chow BY, Surek B, Melkonian M, Jayaraman V, Constantine-Paton  
1196 M, Wong GKS, et al. Independent optical excitation of distinct neural populations. *Nature Methods*. 2014;  
1197 11(3):338–346. doi: [10.1038/nmeth.2836](https://doi.org/10.1038/nmeth.2836).
- 1198 **Klibaite U**, Berman GJ, Cande J, Stern DL, Shaevitz JW. An unsupervised method for quantifying the behavior  
1199 of paired animals. *Physical Biology*. 2017; 14(1):015006. doi: [10.1088/1478-3975/aa5c50](https://doi.org/10.1088/1478-3975/aa5c50).
- 1200 **Krajbich I**. Accounting for attention in sequential sampling models of decision making. *Current Opinion in*  
1201 *Psychology*. 2019; 29:6–11. doi: [10.1016/j.copsyc.2018.10.008](https://doi.org/10.1016/j.copsyc.2018.10.008).
- 1202 **Krynitsky J**, Legaria AA, Pai JJ, Garmendia-Cedillos M, Salem G, Pohida T, Kravitz AV. Rodent arena tracker  
1203 (Rat): A machine vision rodent tracking camera and closed loop control system. *eNeuro*. 2020; 7(3). doi:  
1204 [10.1523/ENEURO.0485-19.2020](https://doi.org/10.1523/ENEURO.0485-19.2020).
- 1205 **Kudow N**, Miura D, Schleyer M, Tushima N, Gerber B, Tanimura T. Preference for and learning of amino acids  
1206 in larval *Drosophila*. *Biology Open*. 2017; 6(3):365–369. doi: [10.1242/bio.020412](https://doi.org/10.1242/bio.020412).
- 1207 **Lahiri S**, Shen K, Klein M, Tang A, Kane E, Gershow M, Garrity P, Samuel ADT. Two Alternating Motor Programs  
1208 Drive Navigation in *Drosophila* Larva. *PLoS ONE*. 2011; 6(8):e23180. doi: [10.1371/journal.pone.0023180](https://doi.org/10.1371/journal.pone.0023180).
- 1209 **Lai CSL**, Fisher SE, Hurst JA, Vargha-Khadem F, Monaco AP. A forkhead-domain gene is mutated in a severe  
1210 speech and language disorder. *Nature*. 2001; 413(6855):519–523. doi: [10.1038/35097076](https://doi.org/10.1038/35097076).
- 1211 **Larderet I**, Fritsch PMJ, Gendre N, Neagu-Maier GL, Fetter RD, Schneider-Mizell CM, Truman JW, Zlatić M,  
1212 Cardona A, Sprecher SG. Organization of the *Drosophila* larval visual circuit. *eLife*. 2017; 6:e28387. doi:  
1213 [10.7554/eLife.28387](https://doi.org/10.7554/eLife.28387).

- 1214 **Lee PT**, Lin HW, Chang YH, Fu TF, Dubnau J, Hirsh J, Lee T, Chiang AS. Serotonin-mushroom body circuit mod-  
1215 ulating the formation of anesthesia-resistant memory in *Drosophila*. *Proceedings of the National Academy*  
1216 *of Sciences*. 2011; 108(33):13794–13799. doi: [10.1073/pnas.1019483108](https://doi.org/10.1073/pnas.1019483108).
- 1217 **Lee T**, Luo L. Mosaic analysis with a repressible cell marker for studies of gene function in neuronal morpho-  
1218 genesis. *Neuron*. 1999; 22(3):451–461. doi: [10.1016/S0896-6273\(00\)80701-1](https://doi.org/10.1016/S0896-6273(00)80701-1).
- 1219 **Li H**, Chaney S, Forte M, Hirsh J. Ectopic G-protein expression in dopamine and serotonin neurons blocks  
1220 cocaine sensitization in *Drosophila melanogaster*. *Current Biology*. 2000; 10(4):211–214. doi: [10.1016/S0960-9822\(00\)00340-7](https://doi.org/10.1016/S0960-9822(00)00340-7).
- 1222 **Li HH**, Kroll JR, Lennox SM, Ogundeyi O, Jeter J, Depasquale G, Truman JW. A GAL4 driver resource for devel-  
1223 opmental and behavioral studies on the larval CNS of *Drosophila*. *Cell Reports*. 2014; 8(3):897–908. doi:  
1224 [10.1016/j.celrep.2014.06.065](https://doi.org/10.1016/j.celrep.2014.06.065).
- 1225 **Li Y**, Yao Q, Tian B, Xu W. Fast double-parallel image processing based on FPGA. In: *IEEE International Conference*  
1226 *on Vehicular Electronics and Safety* IEEE; 2011. p. 97–102. doi: [10.1109/ICVES.2011.5983754](https://doi.org/10.1109/ICVES.2011.5983754).
- 1227 **Lima SQ**, Miesenböck G. Remote control of behavior through genetically targeted photostimulation of neurons.  
1228 *Cell*. 2005; 121(1):141–152. doi: [10.1016/j.cell.2005.02.004](https://doi.org/10.1016/j.cell.2005.02.004).
- 1229 **Lin S**, Oswald D, Chandra V, Talbot C, Huetteroth W, Waddell S. Neural correlates of water reward in thirsty  
1230 *Drosophila*. *Nature Neuroscience*. 2014; 17(11):1536–1542. doi: [10.1038/nn.3827](https://doi.org/10.1038/nn.3827).
- 1231 **Liu C**, Plaçais PY, Yamagata N, Pfeiffer BD, Aso Y, Friedrich AB, Siwanowicz I, Rubin GM, Preat T, Tanimoto H. A  
1232 subset of dopamine neurons signals reward for odour memory in *Drosophila*. *Nature*. 2012; 488(7412):512–  
1233 516. doi: [10.1038/nature11304](https://doi.org/10.1038/nature11304).
- 1234 **Liu Z**, Zhou J, Li Y, Hu F, Lu Y, Ma M, Feng Q, Zhang Je, Wang D, Zeng J, Bao J, Kim JY, Chen ZF, El Mestikawy S,  
1235 Luo M. Dorsal Raphe Neurons Signal Reward through 5-HT and Glutamate. *Neuron*. 2014; 81(6):1360–1374.  
1236 doi: [10.1016/j.neuron.2014.02.010](https://doi.org/10.1016/j.neuron.2014.02.010).
- 1237 **Lorenzetti FD**, Baxter DA, Byrne JH. Molecular Mechanisms Underlying a Cellular Analog of Operant Reward  
1238 Learning. *Neuron*. 2008; 59(5):815–828. doi: [10.1016/j.neuron.2008.07.019](https://doi.org/10.1016/j.neuron.2008.07.019).
- 1239 **Lovell JM**, Mylius J, Scheich H, Brosch M. Stimulation of the dopaminergic midbrain as a behavioral reward in  
1240 instrumentally conditioned monkeys. *Brain Stimulation*. 2015; 8(5):868–874. doi: [10.1016/j.brs.2015.04.007](https://doi.org/10.1016/j.brs.2015.04.007).
- 1241 **Lovinger DM**. Neurotransmitter roles in synaptic modulation, plasticity and learning in the dorsal striatum.  
1242 *Neuropharmacology*. 2010; 58(7):951–961. doi: [10.1016/j.neuropharm.2010.01.008](https://doi.org/10.1016/j.neuropharm.2010.01.008).
- 1243 **Luan H**, Peabody NC, Vinson CR, White BH. Refined Spatial Manipulation of Neuronal Function by Combinatorial  
1244 Restriction of Transgene Expression. *Neuron*. 2006; 52(3):425–436. doi: [10.1016/j.neuron.2006.08.028](https://doi.org/10.1016/j.neuron.2006.08.028).
- 1245 **Lundell MJ**, Hirsh J. Temporal and Spatial Development of Serotonin and Dopamine Neurons in the *Drosophila*  
1246 CNS. *Developmental Biology*. 1994; 165(2):385–396. doi: [10.1006/dbio.1994.1261](https://doi.org/10.1006/dbio.1994.1261).
- 1247 **Luo L**, Gershow M, Rosenzweig M, Kang K, Fang-Yen C, Garrity PA, Samuel ADT. Navigational Decision Making in  
1248 *Drosophila* Thermotaxis. *Journal of Neuroscience*. 2010; 30(12):4261–4272. doi: [10.1523/JNEUROSCI.4090-09.2010](https://doi.org/10.1523/JNEUROSCI.4090-09.2010).
- 1249
- 1250 **Luxem K**, Fuhrmann F, Kürsch J, Remy S, Bauer P. Identifying behavioral structure from deep variational em-  
1251 beddings of animal motion. *bioRxiv*. 2020; doi: [10.1101/2020.05.14.095430](https://doi.org/10.1101/2020.05.14.095430).
- 1252 **Marin EC**, Jefferis GSXE, Komiyama T, Zhu H, Luo L. Representation of the Glomerular Olfactory Map in the  
1253 *Drosophila* Brain. *Cell*. 2002; 109(2):243–255. doi: [10.1016/S0092-8674\(02\)00700-6](https://doi.org/10.1016/S0092-8674(02)00700-6).
- 1254 **Masson JB**, Voisinne G, Wong-Ng J, Celani A, Vergassola M. Noninvasive inference of the molecular chemotactic  
1255 response using bacterial trajectories. *Proceedings of the National Academy of Sciences*. 2012; 109(5):1802–  
1256 1807. doi: [10.1073/pnas.1116772109](https://doi.org/10.1073/pnas.1116772109).
- 1257 **Masson JB**, Laurent F, Cardona A, Barré C, Skatchkovsky N, Zlatic M, Jovanic T. Identifying neural substrates of  
1258 competitive interactions and sequence transitions during mechanosensory responses in *Drosophila*. *PLoS*  
1259 *Genetics*. 2020; 16(2):e1008589. doi: [10.1371/journal.pgen.1008589](https://doi.org/10.1371/journal.pgen.1008589).
- 1260 **Mathis A**, Mamidanna P, Cury KM, Abe T, Murthy VN, Mathis MW, Bethge M. DeepLabCut: markerless pose  
1261 estimation of user-defined body parts with deep learning. *Nature Neuroscience*. 2018; 21(9):1281–1289. doi:  
1262 [10.1038/s41593-018-0209-y](https://doi.org/10.1038/s41593-018-0209-y).

- 1263 **Mendoza E**, Colomb J, Rybak J, Pflüger HJ, Zars T, Scharff C, Brembs B. *Drosophila* FoxP mutants are deficient  
1264 in operant self-learning. *PLoS ONE*. 2014; 9(6):e100648. doi: [10.1371/journal.pone.0100648](https://doi.org/10.1371/journal.pone.0100648).
- 1265 **Meneses A**, Liy-Salmeron G. Serotonin and emotion, learning and memory. *Reviews in the Neurosciences*.  
1266 2012; 23(5-6):543–553. doi: [10.1515/revneuro-2012-0060](https://doi.org/10.1515/revneuro-2012-0060).
- 1267 **Mirat O**, Sternberg JR, Severi KE, Wyart C. ZebraZoom: an automated program for high-throughput behavioral  
1268 analysis and categorization. *Frontiers in Neural Circuits*. 2013; 7:107. doi: [10.3389/fncir.2013.00107](https://doi.org/10.3389/fncir.2013.00107).
- 1269 **Mischiati M**, Lin HT, Herold P, Imler E, Olberg R, Leonardo A. Internal models direct dragonfly interception  
1270 steering. *Nature*. 2015; 517(7534):333–338. doi: [10.1038/nature14045](https://doi.org/10.1038/nature14045).
- 1271 **Nargeot R**, Baxter DA, Byrne JH. Contingent-Dependent Enhancement of Rhythmic Motor Patterns: An  
1272 In Vitro Analog of Operant Conditioning. *The Journal of Neuroscience*. 1997; 17(21):8093–8105. doi:  
1273 [10.1523/JNEUROSCI.17-21-08093.1997](https://doi.org/10.1523/JNEUROSCI.17-21-08093.1997).
- 1274 **Nargeot R**, Le Bon-Jego M, Simmers J. Cellular and Network Mechanisms of Operant Learning-Induced Com-  
1275 pulsive Behavior in *Aplysia*. *Current Biology*. 2009; 19(12):975–984. doi: [10.1016/j.cub.2009.05.030](https://doi.org/10.1016/j.cub.2009.05.030).
- 1276 **Nern A**, Pfeiffer BD, Rubin GM. Optimized tools for multicolor stochastic labeling reveal diverse stereo-  
1277 typed cell arrangements in the fly visual system. *Proceedings of the National Academy of Sciences*. 2015;  
1278 112(22):E2967–E2976. doi: [10.1073/pnas.1506763112](https://doi.org/10.1073/pnas.1506763112).
- 1279 **Neuser K**, Husse J, Stock P, Gerber B. Appetitive olfactory learning in *Drosophila* larvae: effects of repetition,  
1280 reward strength, age, gender, assay type and memory span. *Animal Behaviour*. 2005; 69(4):891–898. doi:  
1281 [10.1016/j.anbehav.2004.06.013](https://doi.org/10.1016/j.anbehav.2004.06.013).
- 1282 **Neuser K**, Triphan T, Mronz M, Poeck B, Strauss R. Analysis of a spatial orientation memory in *Drosophila*.  
1283 *Nature*. 2008; 453(7199):1244–1247. doi: [10.1038/nature07003](https://doi.org/10.1038/nature07003).
- 1284 **Niewalda T**, Singhal N, Fiala A, Saumweber T, Wegener S, Gerber B. Salt Processing in Larval *Drosophila*: Choice,  
1285 Feeding, and Learning Shift from Appetitive to Aversive in a Concentration-Dependent Way. *Chemical Senses*.  
1286 2008; 33(8):685–692. doi: [10.1093/chemse/bjn037](https://doi.org/10.1093/chemse/bjn037).
- 1287 **Nottebohm F**. Reassessing the mechanisms and origins of vocal learning in birds. *Trends in Neurosciences*.  
1288 1991; 14(5):206–211. doi: [10.1016/0166-2236\(91\)90107-6](https://doi.org/10.1016/0166-2236(91)90107-6).
- 1289 **Nuwal N**, Stock P, Hiemeyer J, Schmid B, Fiala A, Buchner E. Avoidance of Heat and Attraction to Optogenetically  
1290 Induced Sugar Sensation as Operant Behavior in Adult *Drosophila*. *Journal of Neurogenetics*. 2012; 26(3-  
1291 4):298–305. doi: [10.3109/01677063.2012.700266](https://doi.org/10.3109/01677063.2012.700266).
- 1292 **Ohyama T**, Jovanic T, Denisov G, Dang TC, Hoffmann D, Kerr RA, Zlatic M. High-Throughput Analysis of Stimulus-  
1293 Evoked Behaviors in *Drosophila* Larva Reveals Multiple Modality-Specific Escape Strategies. *PLoS ONE*. 2013;  
1294 8(8):e71706. doi: [10.1371/journal.pone.0071706](https://doi.org/10.1371/journal.pone.0071706).
- 1295 **Ohyama T**, Schneider-Mizell CM, Fetter RD, Aleman JV, Franconville R, Rivera-Alba M, Mensh BD, Branson KM,  
1296 Simpson JH, Truman JW, Cardona A, Zlatic M. A multilevel multimodal circuit enhances action selection in  
1297 *Drosophila*. *Nature*. 2015; 520(7549):633–639. doi: [10.1038/nature14297](https://doi.org/10.1038/nature14297).
- 1298 **Olds J**, Milner P. Positive reinforcement produced by electrical stimulation of septal area and other regions of  
1299 rat brain. *Journal of Comparative and Physiological Psychology*. 1954; 47(6):419–427. doi: [10.1037/h0058775](https://doi.org/10.1037/h0058775).
- 1300 **Owald D**, Felsenberg J, Talbot CB, Das G, Perisse E, Huetteroth W, Waddell S. Activity of defined mushroom  
1301 body output neurons underlies learned olfactory behavior in *Drosophila*. *Neuron*. 2015; 86(2):417–427. doi:  
1302 [10.1016/j.neuron.2015.03.025](https://doi.org/10.1016/j.neuron.2015.03.025).
- 1303 **Owald D**, Waddell S. Olfactory learning skews mushroom body output pathways to steer behavioral choice in  
1304 *Drosophila*. *Current Opinion in Neurobiology*. 2015; 35:178–184. doi: [10.1016/j.conb.2015.10.002](https://doi.org/10.1016/j.conb.2015.10.002).
- 1305 **Park J**, Lee SB, Lee S, Kim Y, Song S, Kim S, Bae E, Kim J, Shong M, Kim JM, Chung J. Mitochondrial dysfunc-  
1306 tion in *Drosophila* PINK1 mutants is complemented by parkin. *Nature*. 2006; 441(7097):1157–1161. doi:  
1307 [10.1038/nature04788](https://doi.org/10.1038/nature04788).
- 1308 **Pavlov IP**. *Conditioned reflexes: an investigation of the physiological activity of the cerebral cortex*. Oxford:  
1309 Oxford University Press; 1927. doi: [10.2307/1134737](https://doi.org/10.2307/1134737).

- 1310 **Perisse E**, Oswald D, Barnstedt O, Talbot CB, Huetteroth W, Waddell S. Aversive Learning and Appetitive Moti-  
1311 vation Toggle Feed-Forward Inhibition in the Drosophila Mushroom Body. *Neuron*. 2016; 90(5):1086–1099.  
1312 doi: [10.1016/j.neuron.2016.04.034](https://doi.org/10.1016/j.neuron.2016.04.034).
- 1313 **Pfeiffer BD**, Jenett A, Hammonds AS, Ngo TTB, Misra S, Murphy C, Scully A, Carlson JW, Wan KH, Laverty TR,  
1314 Mungall C, Svirskas R, Kadonaga JT, Doe CQ, Eisen MB, Celniker SE, Rubin GM. Tools for neuroanatomy and  
1315 neurogenetics in Drosophila. *Proceedings of the National Academy of Sciences*. 2008; 105(28):9715–9720.  
1316 doi: [10.1073/pnas.0803697105](https://doi.org/10.1073/pnas.0803697105).
- 1317 **Pfeiffer BD**, Ngo TTB, Hibbard KL, Murphy C, Jenett A, Truman JW, Rubin GM. Refinement of Tools for Targeted  
1318 Gene Expression in Drosophila. *Genetics*. 2010; 186(2):735–755. doi: [10.1534/genetics.110.119917](https://doi.org/10.1534/genetics.110.119917).
- 1319 **Plaçais PY**, Trannoy S, Friedrich AB, Tanimoto H, Preat T. Two pairs of mushroom body efferent neurons are  
1320 required for appetitive long-term memory retrieval in drosophila. *Cell Reports*. 2013; 5(3):769–780. doi:  
1321 [10.1016/j.celrep.2013.09.032](https://doi.org/10.1016/j.celrep.2013.09.032).
- 1322 **Reddy G**, Desban L, Tanaka H, Roussel J, Mirat O, Wyart C. A lexical approach for identifying behavioral action  
1323 sequences. *bioRxiv*. 2020; doi: [10.1101/2020.08.27.270694](https://doi.org/10.1101/2020.08.27.270694).
- 1324 **Redgrave P**, Vautrelle N, Reynolds JNJ. Functional properties of the basal ganglia's re-entrant loop architecture:  
1325 selection and reinforcement. *Neuroscience*. 2011; 198:138–151. doi: [10.1016/j.neuroscience.2011.07.060](https://doi.org/10.1016/j.neuroscience.2011.07.060).
- 1326 **Rescorla RA**. Behavioral Studies of Pavlovian Conditioning. *Annual Review of Neuroscience*. 1988; 11:329–352.  
1327 doi: [10.1146/annurev.neuro.11.1.329](https://doi.org/10.1146/annurev.neuro.11.1.329).
- 1328 **Reynolds JNJ**, Wickens JR. Dopamine-dependent plasticity of corticostriatal synapses. *Neural Networks*. 2002;  
1329 15(4-6):507–521. doi: [10.1016/S0893-6080\(02\)00045-X](https://doi.org/10.1016/S0893-6080(02)00045-X).
- 1330 **Robertson JL**, Tsubouchi A, Tracey WD. Larval Defense against Attack from Parasitoid Wasps Requires Noci-  
1331 ceptive Neurons. *PLoS ONE*. 2013; 8(10):e78704. doi: [10.1371/journal.pone.0078704](https://doi.org/10.1371/journal.pone.0078704).
- 1332 **Robie AA**, Hirokawa J, Edwards AW, Umayam LA, Lee A, Phillips ML, Card GM, Korff W, Rubin GM, Simpson  
1333 JH, Reiser MB, Branson K. Mapping the Neural Substrates of Behavior. *Cell*. 2017; 170(2):393–406. doi:  
1334 [10.1016/j.cell.2017.06.032](https://doi.org/10.1016/j.cell.2017.06.032).
- 1335 **Rohwedder A**, Pfitzenmaier JE, Ramsperger N, Apostolopoulou AA, Widmann A, Thum AS. Nutritional Value-  
1336 Dependent and Nutritional Value-Independent Effects on Drosophila melanogaster Larval Behavior. *Chemical Senses*. 2012; 37(8):711–721. doi: [10.1093/chemse/bjs055](https://doi.org/10.1093/chemse/bjs055).
- 1338 **Rohwedder A**, Wenz NL, Stehle B, Huser A, Yamagata N, Zlatic M, Truman JW, Tanimoto H, Saumweber T, Ger-  
1339 ber B, Thum AS. Four Individually Identified Paired Dopamine Neurons Signal Reward in Larval Drosophila.  
1340 *Current Biology*. 2016; 26(5):661–669. <http://linkinghub.elsevier.com/retrieve/pii/S0960982216000622>, doi:  
1341 [10.1016/j.cub.2016.01.012](https://doi.org/10.1016/j.cub.2016.01.012).
- 1342 **Rosenegger D**, Lukowiak K. The participation of NMDA receptors, PKC, and MAPK in the formation of memory  
1343 following operant conditioning in Lymnaea. *Molecular Brain*. 2010; 3:24. doi: [10.1186/1756-6606-3-24](https://doi.org/10.1186/1756-6606-3-24).
- 1344 **Roy B**, Singh AP, Shetty C, Chaudhary V, North A, Landgraf M, VijayRaghavan K, Rodrigues V. Metamorphosis of  
1345 an identified serotonergic neuron in the Drosophila olfactory system. *Neural Development*. 2007; 2:20. doi:  
1346 [10.1186/1749-8104-2-20](https://doi.org/10.1186/1749-8104-2-20).
- 1347 **Saumweber T**, Husse J, Gerber B. Innate attractiveness and associative learnability of odors can be dissociated  
1348 in larval Drosophila. *Chemical Senses*. 2011; 36(3):223–235. doi: [10.1093/chemse/bjq128](https://doi.org/10.1093/chemse/bjq128).
- 1349 **Saumweber T**, Rohwedder A, Schleyer M, Eichler K, Chen Yc, Aso Y, Cardona A, Eschbach C, Kobler O, Voigt A,  
1350 Durairaja A, Mancini N, Zlatic M, Truman JW, Thum AS, Gerber B. Functional architecture of reward learning  
1351 in mushroom body extrinsic neurons of larval Drosophila. *Nature Communications*. 2018; 9(1):1104. doi:  
1352 [10.1038/s41467-018-03130-1](https://doi.org/10.1038/s41467-018-03130-1).
- 1353 **Sawin-McCormack EP**, Sokolowski MB, Campos AR. Characterization and Genetic Analysis of Drosophila  
1354 Melanogaster Photobehavior During Larval Development. *Journal of Neurogenetics*. 1995; 10(2):119–135.  
1355 doi: [10.3109/01677069509083459](https://doi.org/10.3109/01677069509083459).
- 1356 **Scherer S**, Stocker RF, Gerber B. Olfactory Learning in Individually Assayed Drosophila Larvae. *Learning &*  
1357 *Memory*. 2003; 10(3):217–225. doi: [10.1101/lm.57903](https://doi.org/10.1101/lm.57903).

- 1358 **Schipanski A**, Yarali A, Niewalda T, Gerber B. Behavioral Analyses of Sugar Processing in Choice, Feeding, and  
1359 Learning in Larval *Drosophila*. *Chemical Senses*. 2008; 33(6):563–573. doi: 10.1093/chemse/bjn024.
- 1360 **Schlegel P**, Texada MJ, Miroschnikow A, Schoofs A, Hückesfeld S, Peters M, Schneider-Mizell CM, Lacin H, Li F,  
1361 Fetter RD, Truman JW, Cardona A, Pankratz MJ. Synaptic transmission parallels neuromodulation in a central  
1362 food-intake circuit. *eLife*. 2016; 5:e16799. doi: 10.7554/eLife.16799.
- 1363 **Schleyer M**, Miura D, Tanimura T, Gerber B. Learning the specific quality of taste reinforcement in larval  
1364 *Drosophila*. *eLife*. 2015; 4:e04711. doi: 10.7554/eLife.04711.001.
- 1365 **Schleyer M**, Saumweber T, Nahrendorf W, Fischer B, von Alpen D, Pauls D, Thum A, Gerber B. A behavior-  
1366 based circuit model of how outcome expectations organize learned behavior in larval *Drosophila*. *Learning*  
1367 & *Memory*. 2011; 18(10):639–653. doi: 10.1101/lm.2163411.
- 1368 **Schroll C**, Riemensperger T, Bucher D, Ehmer J, Völler T, Erbguth K, Gerber B, Hendel T, Nagel G, Buchner E,  
1369 Fiala A. Light-Induced Activation of Distinct Modulatory Neurons Triggers Appetitive or Aversive Learning in  
1370 *Drosophila* Larvae. *Current Biology*. 2006; 16(17):1741–1747. doi: 10.1016/j.cub.2006.07.023.
- 1371 **Schulze A**, Gomez-Marin A, Rajendran VG, Lott G, Musy M, Ahammad P, Deogade A, Sharpe J, Riedl J, Jarriault D,  
1372 Trautman ET, Werner C, Venkadesan M, Druckmann S, Jayaraman V, Louis M. Dynamical feature extraction  
1373 at the sensory periphery guides chemotaxis. *eLife*. 2015; 4:e06694. doi: 10.7554/eLife.06694.
- 1374 **Schwaerzel M**, Monastirioti M, Scholz H, Friggi-Grelin F, Birman S, Heisenberg M. Dopamine and Octopamine  
1375 Differentiate between Aversive and Appetitive Olfactory Memories in *Drosophila*. *The Journal of Neuro-*  
1376 *science*. 2003; 23(33):10495–10502. doi: 10.1523/JNEUROSCI.23-33-10495.2003.
- 1377 **Séjourné J**, Plaçais PY, Aso Y, Siwanowicz I, Trannoy S, Thoma V, Tedjakumala SR, Rubin GM, Tchénio P, Ito K,  
1378 Isabel G, Tanimoto H, Preat T. Mushroom body efferent neurons responsible for aversive olfactory memory  
1379 retrieval in *Drosophila*. *Nature Neuroscience*. 2011; 14(7):903–910. doi: 10.1038/nn.2846.
- 1380 **Selcho M**, Pauls D, Han KA, Stocker RF, Thum AS. The Role of Dopamine in *Drosophila* Larval Classical Olfactory  
1381 Conditioning. *PLoS ONE*. 2009; 4(6):e5897. doi: 10.1371/journal.pone.0005897.
- 1382 **Shen W**, Hamilton SE, Nathanson NM, Surmeier DJ. Cholinergic Suppression of KCNQ Channel Currents En-  
1383 hances Excitability of Striatal Medium Spiny Neurons. *Journal of Neuroscience*. 2005; 25(32):7449–7458. doi:  
1384 10.1523/JNEUROSCI.1381-05.2005.
- 1385 **Shirvaikar M**, Bushnaq T. A comparison between DSP and FPGA platforms for real-time imaging applications.  
1386 In: Kehtarnavaz N, Carlsohn MF, editors. *Real-Time Image and Video Processing*, vol. 7244 International Society  
1387 for Optics and Photonics; 2009. p. 724406. doi: 10.1117/12.806099.
- 1388 **Shyu WH**, Chiu TH, Chiang MH, Cheng YC, Tsai YL, Fu TF, Wu T, Wu CL. Neural circuits for long-term  
1389 water-reward memory processing in thirsty *Drosophila*. *Nature Communications*. 2017; 8:15230. doi:  
1390 10.1038/ncomms15230.
- 1391 **Sitaraman D**, LaFerriere H, Birman S, Zars T. Serotonin is Critical for Rewarded Olfactory Short-Term Memory  
1392 in *Drosophila*. *Journal of Neurogenetics*. 2012; 26(2):238–244. doi: 10.3109/01677063.2012.666298.
- 1393 **Sitaraman D**, Zars M, LaFerriere H, Chen YC, Sable-Smith A, Kitamoto T, Rottinghaus GE, Zars T. Serotonin  
1394 is necessary for place memory in *Drosophila*. *Proceedings of the National Academy of Sciences*. 2008;  
1395 105(14):5579–5584. doi: 10.1073/pnas.0710168105.
- 1396 **Skeath JB**, Thor S. Genetic control of *Drosophila* nerve cord development. *Current Opinion in Neurobiology*.  
1397 2003; 13(1):8–15. doi: 10.1016/S0959-4388(03)00007-2.
- 1398 **Skinner BF**. *The Behavior of Organisms: An Experimental Analysis*. New York: NY: Appleton-Century-Crofts;  
1399 1938.
- 1400 **Soares dos Santos MP**, Ferreira JAF. Novel intelligent real-time position tracking system using FPGA and fuzzy  
1401 logic. *ISA Transactions*. 2014; 53(2):402–414. doi: 10.1016/j.isatra.2013.09.003.
- 1402 **Stephens GJ**, Johnson-Kerner B, Bialek W, Ryu WS. Dimensionality and Dynamics in the Behavior of *C. elegans*.  
1403 *PLoS Computational Biology*. 2008; 4(4):e1000028. doi: 10.1371/journal.pcbi.1000028.
- 1404 **Stowers JR**, Hofbauer M, Bastien R, Griessner J, Higgins P, Farooqui S, Fischer RM, Nowikovsky K, Haubensak  
1405 W, Couzin ID, Tessmar-Raible K, Straw AD. Virtual reality for freely moving animals. *Nature Methods*. 2017;  
1406 14(10):995–1002. doi: 10.1038/nmeth.4399.



- 1407 **Straw AD**, Branson K, Neumann TR, Dickinson MH. Dimensional Tracking of Multiple Flying Animals. *Journal*  
1408 *of the Royal Society Interface*. 2011; 8(56):395–409. doi: [10.1098/rsif.2010.0230](https://doi.org/10.1098/rsif.2010.0230).
- 1409 **Straw AD**, Dickinson MH. Motmot, an open-source toolkit for realtime video acquisition and analysis. *Source*  
1410 *Code for Biology and Medicine*. 2009; 4:5. doi: [10.1186/1751-0473-4-5](https://doi.org/10.1186/1751-0473-4-5).
- 1411 **Sun R**, Delly J, Sereno E, Wong S, Chen X, Wang Y, Huang Y, Greenspan RJ. Anti-instinctive Learning Behavior  
1412 Revealed by Locomotion-Triggered Mild Heat Stress in *Drosophila*. *Frontiers in Behavioral Neuroscience*.  
1413 2020; 14:41. doi: [10.3389/fnbeh.2020.00041](https://doi.org/10.3389/fnbeh.2020.00041).
- 1414 **Surmeier DJ**, Ding J, Day M, Wang Z, Shen W. D1 and D2 dopamine-receptor modulation of striatal gluta-  
1415 matergic signaling in striatal medium spiny neurons. *Trends in Neurosciences*. 2007; 30(5):228–235. doi:  
1416 [10.1016/j.tins.2007.03.008](https://doi.org/10.1016/j.tins.2007.03.008).
- 1417 **Swierczek NA**, Giles AC, Rankin CH, Kerr RA. High-throughput behavioral analysis in *C. elegans*. *Nature Meth-*  
1418 *ods*. 2011; 8(7):592–598. doi: [10.1038/nmeth.1625](https://doi.org/10.1038/nmeth.1625).
- 1419 **Tadres D**, Louis M. PiVR: An affordable and versatile closed-loop platform to study unrestrained sensorimotor  
1420 behavior. *PLOS Biology*. 2020; 18(7):e3000712. doi: [10.1371/journal.pbio.3000712](https://doi.org/10.1371/journal.pbio.3000712).
- 1421 **Takeda K**. Classical conditioned response in the honey bee. *Journal of Insect Physiology*. 1961; 6(3):168–179.  
1422 doi: [10.1016/0022-1910\(61\)90060-9](https://doi.org/10.1016/0022-1910(61)90060-9).
- 1423 **Thorndike EL**. *Animal intelligence; experimental studies*. New York: The Macmillan company; 1911. doi:  
1424 [10.5962/bhl.title.1201](https://doi.org/10.5962/bhl.title.1201).
- 1425 **Tonegawa S**, Pignatelli M, Roy DS, Ryan TJ. Memory engram storage and retrieval. *Current Opinion in Neuro-*  
1426 *biology*. 2015; 35:101–109. doi: [10.1016/j.conb.2015.07.009](https://doi.org/10.1016/j.conb.2015.07.009).
- 1427 **Topál J**, Byrne RW, Miklósi Á, Csányi V. Reproducing human actions and action sequences: "Do as I do!" in a  
1428 dog. *Animal Cognition*. 2006; 9(4):355–367. doi: [10.1007/s10071-006-0051-6](https://doi.org/10.1007/s10071-006-0051-6).
- 1429 **Tracey WD**, Wilson RI, Laurent G, Benzer S. painless, a *Drosophila* Gene Essential for Nociception. *Cell*. 2003;  
1430 113(2):261–273. doi: [10.1016/S0092-8674\(03\)00272-1](https://doi.org/10.1016/S0092-8674(03)00272-1).
- 1431 **Tully T**, Cambiazo V, Kruse L. Memory through Metamorphosis. *Journal of Neuroscience*. 1994; 14(1):68–74.  
1432 doi: [10.1523/JNEUROSCI.14-01-00068.1994](https://doi.org/10.1523/JNEUROSCI.14-01-00068.1994).
- 1433 **Turner GC**, Bazhenov M, Laurent G. Olfactory Representations by *Drosophila* Mushroom Body Neurons. *Jour-*  
1434 *nal of Neurophysiology*. 2008; 99(2):734–746. doi: [10.1152/jn.01283.2007](https://doi.org/10.1152/jn.01283.2007).
- 1435 **Uzun IS**, Amira A, Bouridane A. FPGA implementations of fast Fourier transforms for real-time signal and image  
1436 processing. *IEE Proceedings - Vision, Image, and Signal Processing*. 2005; 152(3):283–296. doi: [10.1049/ip-](https://doi.org/10.1049/ip-vis:20041114)  
1437 [vis:20041114](https://doi.org/10.1049/ip-vis:20041114).
- 1438 **Veeraraghavan A**, Chellappa R, Srinivasan M. Shape-and-Behavior Encoded Tracking of Bee  
1439 Dances. *IEEE Transactions on Pattern Analysis and Machine Intelligence*. 2008; 30(3):463–476. doi:  
1440 [10.1109/TPAMI.2007.70707](https://doi.org/10.1109/TPAMI.2007.70707).
- 1441 **Vinauger C**, Lutz EK, Riffell JA. Olfactory learning and memory in the disease vector mosquito *Aedes aegypti*.  
1442 *Journal of Experimental Biology*. 2014; 217(Pt 13):2321–2330. doi: [10.1242/jeb.101279](https://doi.org/10.1242/jeb.101279).
- 1443 **Vogelstein JT**, Park Y, Ohyama T, Kerr R, Truman JW, Priebe CE, Zlatic M. Discovery of Brainwide Neural-  
1444 Behavioral Maps via Multiscale Unsupervised Structure Learning. *Science*. 2014; 344(6182):386–392. doi:  
1445 [10.1126/science.1250298](https://doi.org/10.1126/science.1250298).
- 1446 **Vogt K**, Schnaitmann C, Dylla KV, Knapek S, Aso Y, Rubin GM, Tanimoto H. Shared mushroom body circuits  
1447 underlie visual and olfactory memories in *Drosophila*. *eLife*. 2014; 3:e02395. doi: [10.7554/eLife.02395](https://doi.org/10.7554/eLife.02395).
- 1448 **Waddell S**. Reinforcement signalling in *Drosophila*; dopamine does it all after all. *Current Opinion in Neurobi-*  
1449 *ology*. 2013; 23(3):324–329. doi: [10.1016/j.conb.2013.01.005](https://doi.org/10.1016/j.conb.2013.01.005).
- 1450 **Webb B**. Neural mechanisms for prediction: Do insects have forward models? *Trends in Neurosciences*. 2004;  
1451 27(5):278–282. doi: [10.1016/j.tins.2004.03.004](https://doi.org/10.1016/j.tins.2004.03.004).
- 1452 **Weiglein A**, Gerstner F, Mancini N, Schleyer M, Gerber B. One-trial learning in larval *Drosophila*. *Learning &*  
1453 *Memory*. 2019; 26(4):109–120. doi: [10.1101/lm.049106.118](https://doi.org/10.1101/lm.049106.118).

- 1454 **Wen JYM**, Kumar N, Morrison G, Rambaldini G, Runciman S, Rousseau J, van der Kooy D. Mutations that pre-  
1455 vent associative learning in *C. elegans*. *Behavioral Neuroscience*. 1997; 111(2):354–368. doi: [10.1037/0735-](https://doi.org/10.1037/0735-7044.111.2.354)  
1456 [7044.111.2.354](https://doi.org/10.1037/0735-7044.111.2.354).
- 1457 **Wirtz RA**, Semey HG. The *Drosophila* kitchen-equipment, media preparation, and supplies. *Drosophila Infor-*  
1458 *mation Service*. 1982; 58:176–180.
- 1459 **Wolf R**, Heisenberg M. Basic organization of operant behavior as revealed in *Drosophila* flight orientation.  
1460 *Journal of Comparative Physiology A*. 1991; 169(6):699–705. doi: [10.1007/BF00194898](https://doi.org/10.1007/BF00194898).
- 1461 **Wolf R**, Wittig T, Liu L, Wustmann G, Eyding D, Heisenberg M. *Drosophila* mushroom bodies are dispensable  
1462 for visual, tactile, and motor learning. *Learning & Memory*. 1998; 5(1-2):166–78.
- 1463 **Wong AM**, Wang JW, Axel R. Spatial representation of the glomerular map in the *Drosophila* protocerebrum.  
1464 *Cell*. 2002; 109(2):229–241. doi: [10.1016/S0092-8674\(02\)00707-9](https://doi.org/10.1016/S0092-8674(02)00707-9).
- 1465 **Wright GA**, Mustard JA, Simcock NK, Ross-Taylor AAR, McNicholas LD, Popescu A, Marion-Poll F. Parallel rein-  
1466 forcement pathways for conditioned food aversions in the honeybee. *Current Biology*. 2010; 20(24):2234–  
1467 2240. doi: [10.1016/j.cub.2010.11.040](https://doi.org/10.1016/j.cub.2010.11.040).
- 1468 **Wu MC**, Chu LA, Hsiao PY, Lin YY, Chi CC, Liu TH, Fu CC, Chiang AS. Optogenetic control of selective neural  
1469 activity in multiple freely moving *Drosophila* adults. *Proceedings of the National Academy of Sciences*. 2014;  
1470 111(14):5367–5372. doi: [10.1073/pnas.1400997111](https://doi.org/10.1073/pnas.1400997111).
- 1471 **Yasukawa S**, Okuno H, Ishii K, Yagi T. Real-time object tracking based on scale-invariant features employing  
1472 bio-inspired hardware. *Neural Networks*. 2016; 81:29–38. doi: [10.1016/j.neunet.2016.05.002](https://doi.org/10.1016/j.neunet.2016.05.002).
- 1473 **Yu D**, Keene AC, Srivatsan A, Waddell S, Davis RL. *Drosophila* DPM neurons form a delayed and  
1474 branch-specific memory trace after olfactory classical conditioning. *Cell*. 2005; 123(5):945–957. doi:  
1475 [10.1016/j.cell.2005.09.037](https://doi.org/10.1016/j.cell.2005.09.037).
- 1476 **Zemelman BV**, Lee GA, Ng M, Miesenböck G. Selective photostimulation of genetically chARGed neurons.  
1477 *Neuron*. 2002; 33(1):15–22. doi: [10.1016/S0896-6273\(01\)00574-8](https://doi.org/10.1016/S0896-6273(01)00574-8).
- 1478 **Zhang C**, Liang T, Mok PKT, Yu W. FPGA Implementation of the Coupled Filtering Method and the Affine Warping  
1479 Method. *IEEE Transactions on Nanobioscience*. 2017; 16(5):314–325. doi: [10.1109/TNB.2017.2705104](https://doi.org/10.1109/TNB.2017.2705104).

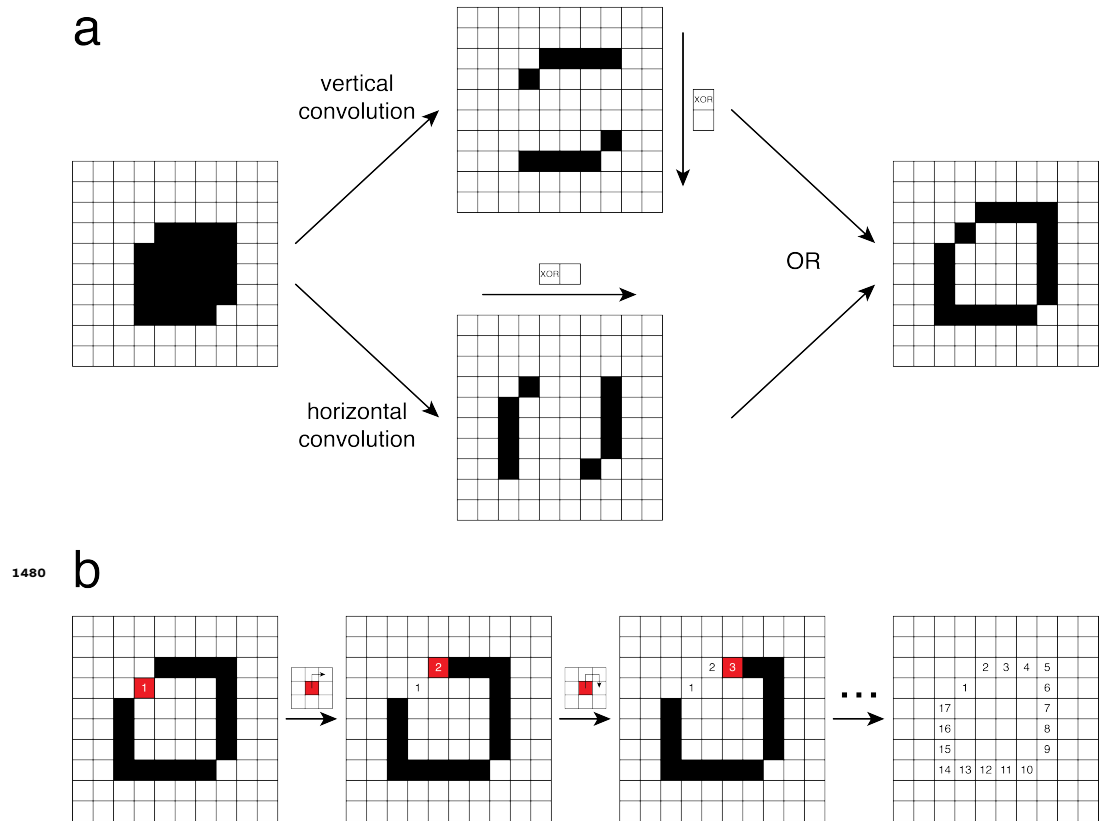

**Figure 1-Figure supplement 1. Contour calculation on field-programmable gate array (FPGA).**

A simplified example is shown using a 10 x 10 pixel box containing a small object. **a.** The object (black) was detected against the background (white) using binary thresholding. Edge pixels were detected by combining the results of vertical and horizontal image convolution with a 2 x 1 XOR kernel using an OR operator. **b.** The contour points were reconstructed in an iterative process, starting with the edge pixel closest to the centre of the box. The next contour point was defined as the first neighbouring pixel that was found to be an edge pixel. Neighbouring pixels were assessed clockwise from the pixel directly above the contour point. The process ended when no eligible edge pixels could be found.

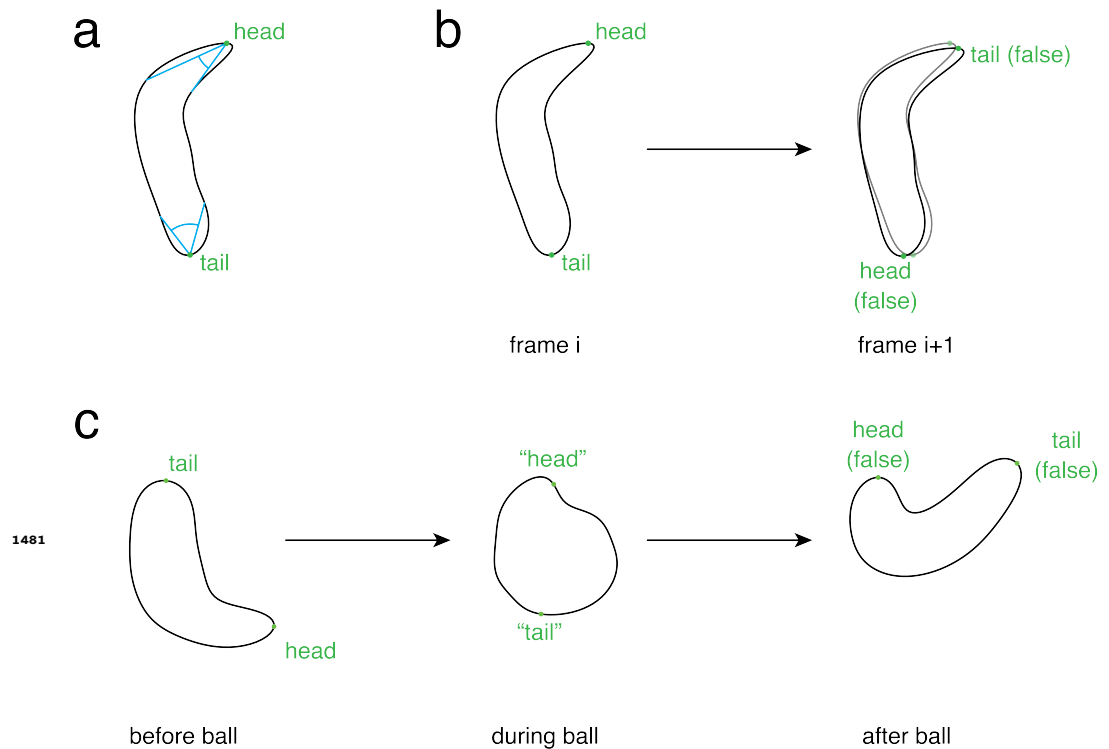

1481

**Figure 1-Figure supplement 2. Detecting head and tail.** The larval contour (black outline) and head and tail (green) are shown. **a.** Initial detection of head and tail. The head was the contour point with the sharpest curvature. The tail was the contour point with the next-sharpest curvature which did not lie in close proximity to the head. **b.** The initial detection of head and tail was incorrect in some cases. False detection could be corrected by swapping head and tail, thereby minimising the distances from head and tail in the current frame (solid contour) to head and tail in the previous frame (transparent contour). **c.** The correction described in **b** failed if larvae curled up such that the contour appeared circular ("ball"). To eliminate this source of false head and tail detection, these events were detected using a ball classifier.

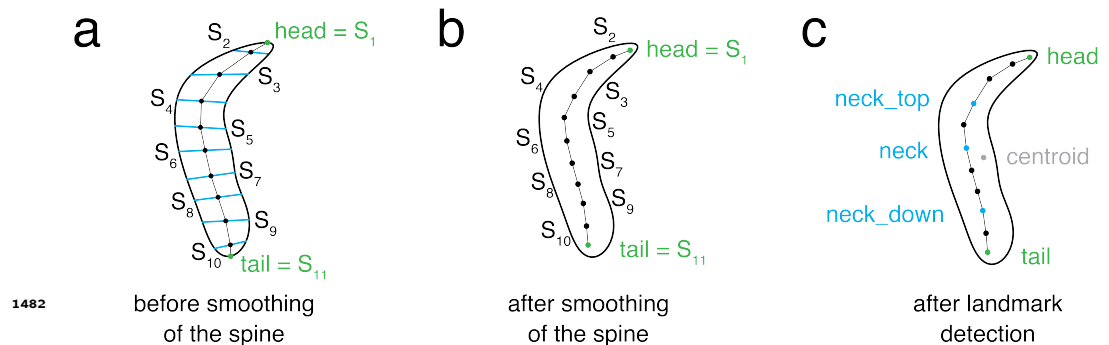

1482

**Figure 1-Figure supplement 3. Calculating a smooth spine and landmark points.** The larval contour is shown (black outline). The spine  $S$  was comprised of eleven points (black), including head and tail (green). **a.** The raw spine points were obtained by finding the centres between equally spaced contour points on either half of the contour as defined by head and tail. The first spine point was the head, the last spine point was the tail. **b.** The smooth spine was obtained by exponentially smoothing the raw spine. **c.** Four additional landmark points, `neck_top`, `neck`, and `neck_down` (blue), and the contour `centroid` (grey), were calculated.

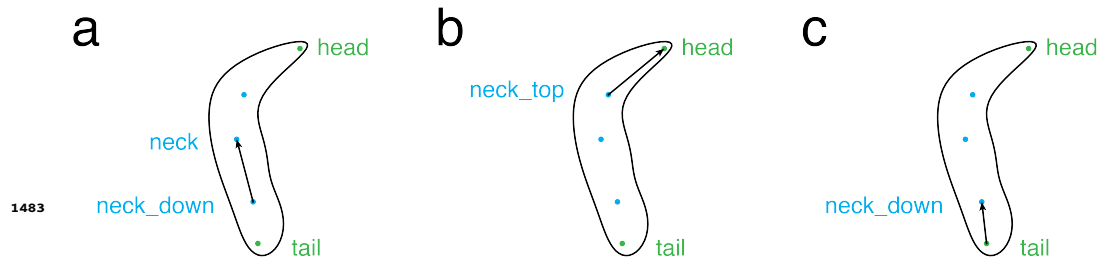

**Figure 1-Figure supplement 4. Calculating direction vectors.** Three direction vectors were calculated based on head, tail, and the landmark points. **a.** `direction_vector` was the normalised vector from `neck_down` to `neck`. **b.** `direction_head_vector` was the normalised vector from `neck_top` to `head`. **c.** `direction_tail_vector` was the normalised vector from `tail` to `neck_down`.

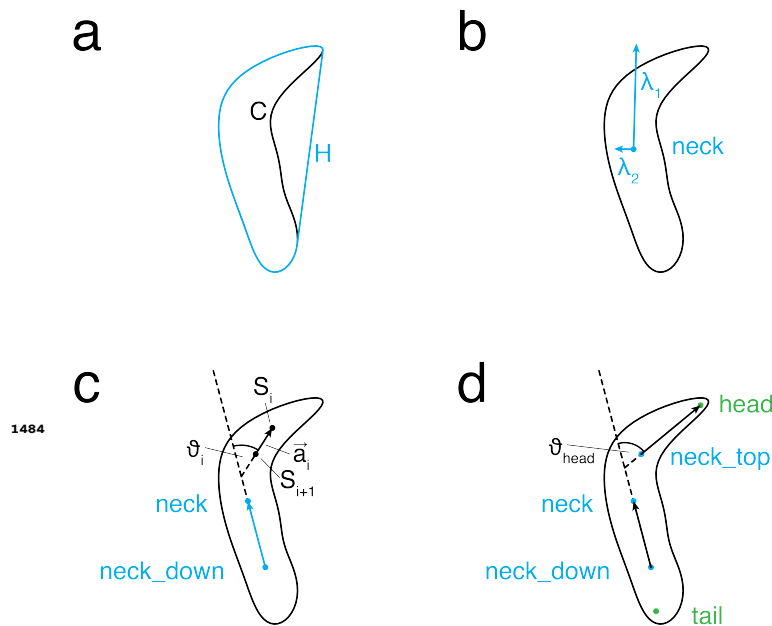

**Figure 1-Figure supplement 5. Features describing body shape.** **a.** Outline of a larva with contour  $C$  (black) and its convex hull  $H$  (blue). **b.** Shown here are the eigenvectors (blue) of the larval contour (black) structure tensor with respect to `neck` and their corresponding eigenvalues  $\lambda_1$  and  $\lambda_2$ . **c.**  $\vartheta_i$  was defined as the angle between `direction_vector` (blue) and the vector  $\vec{a}_i$  that passed through spine points  $S_i$  and  $S_{i+1}$  (black). **d.**  $\vartheta_{\text{head}}$  was defined as the angle between `direction_vector` and `direction_head_vector`. `head` and `tail` are shown in green.



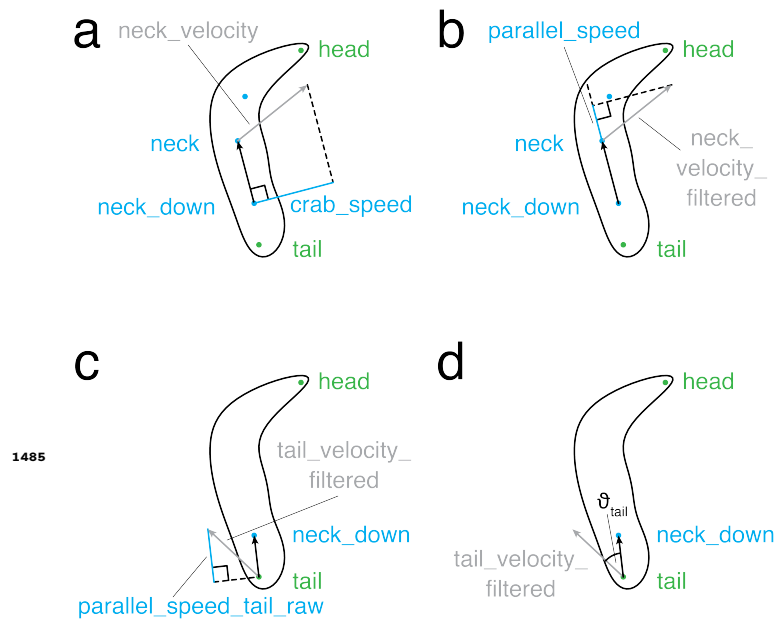

1485

**Figure 1-Figure supplement 6. Velocity features.** The larval contour is shown in black while head and tail are shown in green. **a.** crab\_speed (blue) was defined as the component of neck\_speed (grey) that was orthogonal to direction\_vector\_filtered (black). **b.** parallel\_speed (blue) was defined as the component of neck\_speed\_filtered (grey) that was parallel to direction\_vector\_filtered (black). **c.** parallel\_speed\_tail\_raw (blue) was defined as the component of tail\_speed\_filtered (grey) that was parallel to direction\_tail\_vector\_filtered (black). **d.**  $\vartheta_{tail}$  was defined as the angle between tail\_speed\_filtered (grey) and direction\_tail\_vector\_filtered (black).

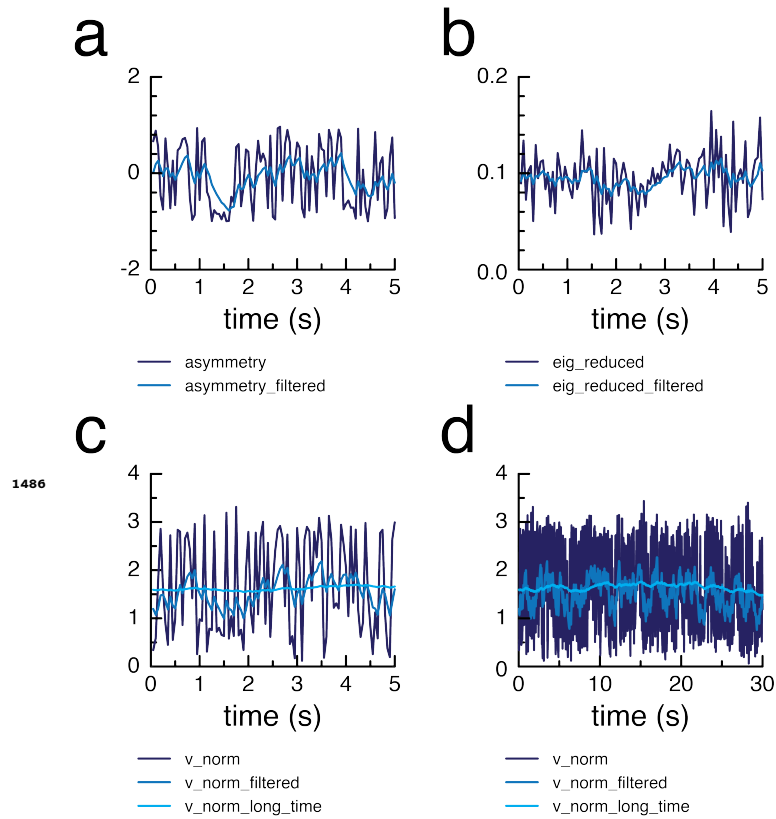

**Figure 1-Figure supplement 7. Temporal smoothing of features.** a-b. Example graphs of raw (dark blue) and filtered (mid blue) *asymmetry* (a) and *eig\_reduced* (b) values over time. c-d. Example graphs of raw (dark blue), filtered (mid blue), and long-time filtered (light blue) *v\_norm* values over a short (c) and a long (d) period of time.

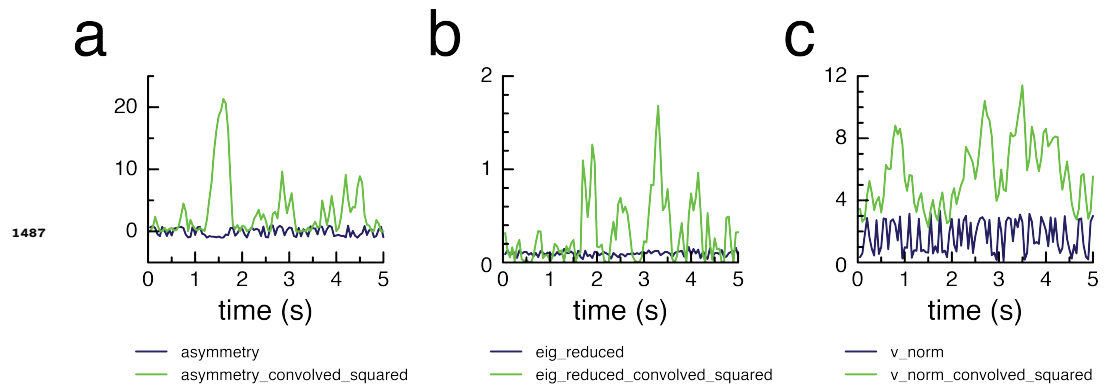

**Figure 1-Figure supplement 8. Differentiation by convolution.** Example graphs of raw (dark blue) and convolved squared (green) *asymmetry* (a), *eig\_reduced* (b) and *v\_norm* (c) values over time.

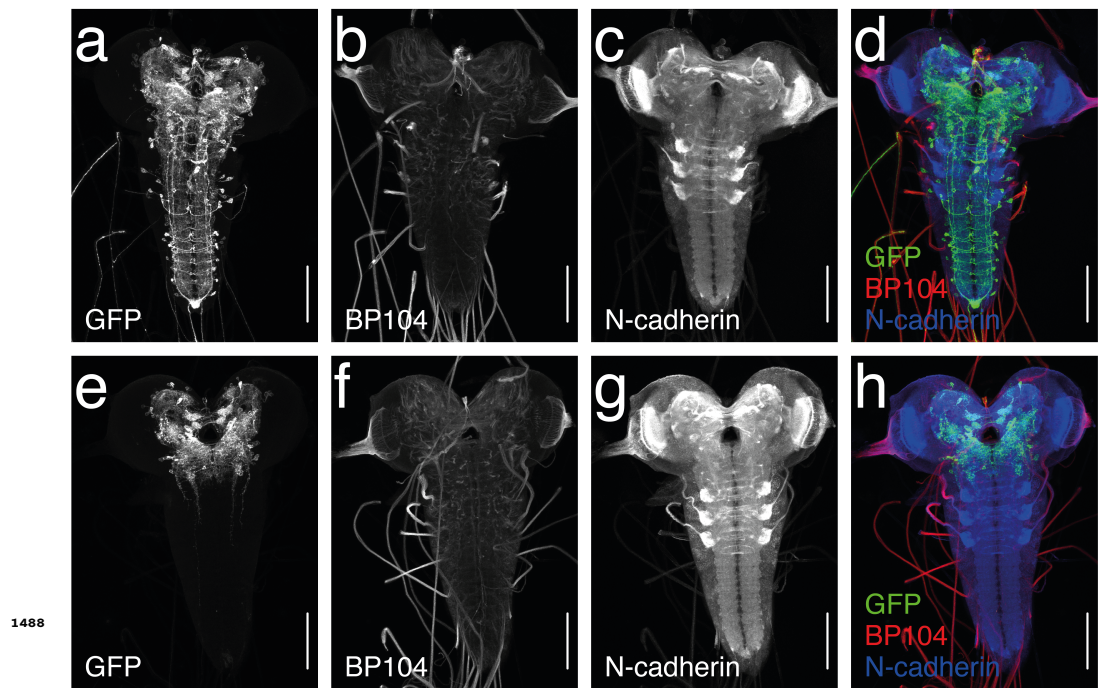

1488

**Figure 3-Figure supplement 1. *Ddc-Gal4* expression pattern without and with *tsh-Gal80* restriction.** Maximum intensity projections of confocal images obtained after immunohistochemical staining. **a, e**; green in **d** and **h**. Targeting a green fluorescent protein (GFP) antibody to the *mVenus* tag of *CsChrimson*. **b, f**; red in **d** and **h**. Staining against BP104. **c, g**; blue in **d** and **h**. Staining against N-cadherin. **a-d**. *Ddc-Gal4* x *UAS-CsChrimson* larvae. Manually counting the cell bodies in the image stacks revealed more than 200 GFP-positive neurons located in the brain, subesophageal zone (SEZ), and ventral nerve cord (VNC), including the PAM cluster dopaminergic neurons innervating the mushroom body ( $n = 2$ ). This confirmed that *Ddc-Gal4* drives broad expression across the central nervous system (CNS) (Lundell and Hirsh, 1994; Li et al., 2000). **e-h**. *Ddc-Gal4* x *UAS-CsChrimson*; *tsh-LexA*, *LexAop-Gal80* larvae. As expected, no GFP-positive neurons were found in the VNC ( $n = 6$ ). *Ddc-Gal4* brain and SEZ expression remained largely unaffected by GAL80, as the GFP-positive neurons in both areas that could be consistently identified in *Ddc-Gal4* x *UAS-CsChrimson* larvae ( $n = 3$ ) were also present in *Ddc-Gal4* x *UAS-CsChrimson*; *tsh-LexA*, *LexAop-Gal80* larvae ( $n = 3$ ). **a-h**. Plan-Apochromat 20x objective, resolution: 592 x 800 pixels, scale bar: 100  $\mu$ m. Images courtesy of the HHMI Janelia FlyLight team.

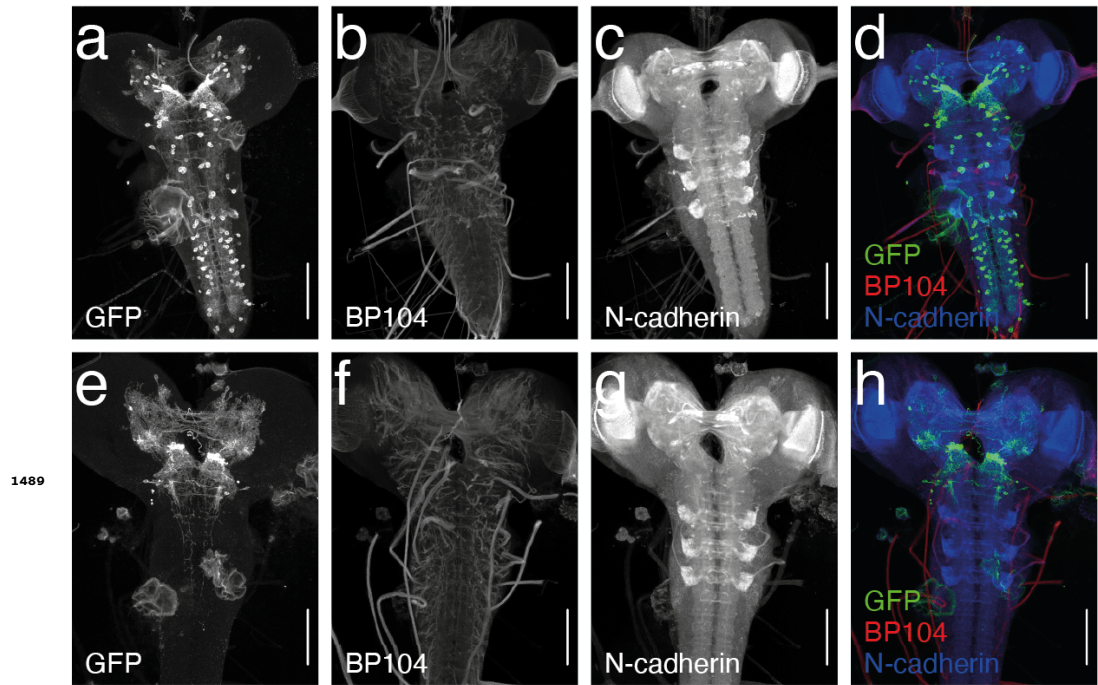

**Figure 4-Figure supplement 1. *Tph-Gal4* expression pattern without and with *tsh-Gal80* restriction.** Maximum intensity projections of confocal images obtained after immunohistochemistry. **a-d.** *Tph-Gal4* x *UAS-CsChrimson* larvae, **e-h.** *Tph-Gal4* x *UAS-CsChrimson*; *tsh-LexA*, *LexAop-Gal80* larvae. **a, e;** green in **d** and **h.** Staining against green fluorescent protein (GFP) antibody targeting the *mVenus* tag of *CsChrimson*. **b, f;** red in **d** and **h.** Staining against BP104. **c, g;** blue in **d** and **h.** Staining against N-cadherin. **a-h.** Plan-Apochromat 20x objective, resolution: 592 x 800 pixels, scale bar: 100  $\mu$ m. Image courtesy of the HHMI Janelia FlyLight team.

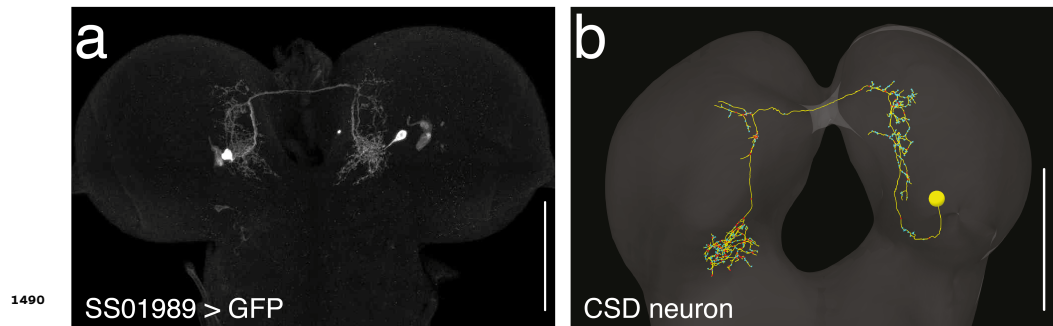

**Figure 4-Figure supplement 2. *SS01989* exclusively drives expression in the CSD neuron.** **a.** Confocal image of a third-instar *SS01989* x *UAS-GFP* larva CNS, derived from maximum intensity projections, obtained after immunohistochemical staining against *GFP*. C-Apochromat 40x objective, resolution: 975 x 651 pixels, scale bar: 100  $\mu$ m. Image courtesy of the HHMI Janelia FlyLight team. **b.** Electron microscopy reconstruction of the contralaterally projecting serotonergic-immunoreactive deutocerebral (CSD) neuron from the central nervous system of a first-instar larva (Berck et al., 2016), scale bar: 50  $\mu$ m.

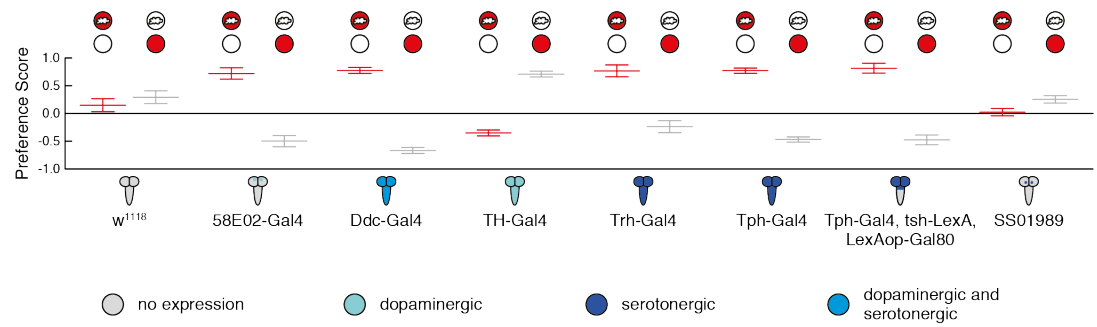

**Figure 4-Figure supplement 3. Paired and unpaired group data for olfactory conditioning experiments.** The data shown here underlies the performance indices depicted in **Figure 4B**. Gal4 expression depicted as color-coded central nervous system. Preference scores for paired (light/odour, dark/air) and unpaired (dark/odour, light/air) groups are shown in red and grey, respectively.
